# Supplementary material for: De novo apical domain formation inside the Drosophila adult midgut epithelium
Source: eLife. 2022 Sep 28;11:e76366. doi: 10.7554/eLife.76366 (PMC9545526; doi:10.7554/eLife.76366)
Supplement: Figure 1—source data 1. [file elife-76366-fig1-data1.xlsx]

## Sheet: Sheet1
ISC/EB	ISC/EB	ee	ee							ISC/EB	ISC/EB	ee	ee
TCJ	BCJ	BCJ	TCJ							TCJ	BCJ	BCJ	TCJ
16	4	3	2							80	20	60	40
25	1	4	1							96.1538	3.84615	80	20
20	0	1	0							100	0	100	0
15	4	6	1							78.9474	21.0526	85.7143	14.2857
15	6	5	2							71.4286	28.5714	71.4286	28.5714
26	5	7	1							83.871	16.129	87.5	12.5
27	0	15	3							100	0	83.3333	16.6667
19	3	5	5							86.3636	13.6364	50	50
49	4	10	5							92.4528	7.54717	66.6667	33.3333
34	0	8	6							100	0	57.1429	42.8571
21	1	13	2							95.4545	4.54545	86.6667	13.3333
37	0	8	5							100	0	61.5385	38.4615
33	0	11	5							100	0	68.75	31.25
17	8	7	0							68	32	100	0
354	36	103	38	531
	390		141
