# Supplementary material for: De novo apical domain formation inside the Drosophila adult midgut epithelium
Source: eLife. 2022 Sep 28;11:e76366. doi: 10.7554/eLife.76366 (PMC9545526; doi:10.7554/eLife.76366)
Supplement: Figure 2—figure supplement 1—source data 1. [file elife-76366-fig2-figsupp1-data1.xlsx]

## Sheet: 1889 hs
sample name	long axis um	short axis um	Vol um3
1889 1p1	4.19	3.863	32.7387
	4.628	2.514	15.3152
	6.756	4.777	80.7233
	8.005	4.211	74.3242
	5.045	4.685	57.9801
	4.418	4.513	47.1145
	4.532	3.191	24.1625
	7.495	4.127	66.8404
	7.554	5.621	124.969
	3.953	3.953	32.3429
	4.314	3.191	23.0002
	6.409	4.314	62.4524
	7.46	4.19	68.5749
	5.3	3.021	25.3265
	5.115	4.314	49.843
	3.975	2.65	14.616
	4.628	2.65	17.017
	5.511	3.794	41.5359
	4.273	2.963	19.6424
	4.532	3.863	35.411
	4.127	3.863	32.2465
1-p2	4.532	3.272	25.4048
	4.273	3.021	20.4189
	6.558	4.532	70.5261
	4.314	2.549	14.6764
	3.863	3.191	20.5957
	4.777	4.314	46.5494
	5.999	2.963	27.5766
	4.904	3.604	33.3518
	3.863	3.272	21.6546
	4.886	4.685	56.1528
	5.3	3.455	33.1261
	3.352	2.059	7.44073
	5.821	4.454	60.464
	4.74	4.454	49.2354
	5.836	4.777	69.7308
	5.999	4.127	53.4991
	5.621	2.811	23.2559
	5.366	3.555	35.5082
	6.285	2.811	26.0031
	4.454	3.953	36.442
	5.699	3.58	38.244
	3.975	2.656	14.6822
	4.19	2.549	14.2545
1-p3	5.002	3.93	40.4508
	4.6	2.779	18.6009
	5.169	4.323	50.5796
	4.6	3.559	30.5079
	4.341	3.537	28.4353
	6.337	3.95	51.7698
	5.668	3.708	40.8045
	3.358	2.993	15.7504
	8.206	4.861	101.527
	6.337	5.502	100.444
	3.761	4.046	32.2369
	4.797	3.069	23.6571
	3.708	3.069	18.2866
	5.124	3.358	30.253
1-p4	5.563	4.685	63.9333
	5.063	3.378	30.25
	3.953	3.555	26.158
	4.374	4.127	39.0073
	5.699	5.463	89.0553
	8.317	5.637	138.376
1-a1	4.74	4.19	43.5718
	3.455	3.05	16.8285
	4.211	3.378	25.1596
	4.314	2.549	14.6764
	3.863	2.963	17.7577
	7.123	4.374	71.3541
	4.374	3.352	25.7327
	4.19	4.028	35.5952
1-a2	5.502	4.029	46.7642
	6.246	4.773	74.5047
	6.321	5.502	100.19
	5.587	5.151	77.6176
	4.029	2.793	16.4565
	4.363	3.95	35.6433
	5.151	3.398	31.1413
	3.009	2.014	6.39057
	5.587	4.029	47.4867
	7.94	5.151	110.307
	7.454	4.029	63.3552
	6.727	4.067	58.2597
	5.151	3.16	26.9317
	5.151	5.3	75.7603
	7.495	6.515	166.571
	6.321	6.043	120.862
	6.75	6.539	151.121
	8.529	6.246	174.221
	7.599	6.75	181.285
	6.727	3.911	53.876
	4.773	4.363	47.573
	4.029	3.577	26.9919
	5.939	4.363	59.1946
	5.939	5.151	82.5078
	5.27	5.151	73.2137
	7.154	4.255	67.8183
	8.258	5.939	152.511
	7.999	4.806	96.7391
	7.284	6.819	177.341
	7.348	6.145	145.282
	6.37	4.806	77.0381
	6.515	4.363	64.9357
	8.727	6.321	182.572
	7.284	5.697	123.783
	8.305	6.37	176.448
	5.939	4.363	59.1946
	7.901	6.043	151.073
	8.305	7.599	251.103
	8.057	6.819	196.161
	7	5.727	120.213
	7.111	6.321	148.765
	6.727	6.043	128.625
	6.91	7.067	180.695
	10.79	8.509	409.051
2-p2	5.028	3.911	40.2689
	5.151	3.577	34.5087
	3.95	2.793	16.1338
	4.029	4.029	34.2445
	3.95	3.16	20.6524
	4.997	4.029	42.472
	6.515	4.504	69.2006
	4.504	4.029	38.2817
	5.059	3.533	33.0636
	5.151	3.95	42.0808
	4.067	3.258	22.6035
	5.587	3.577	37.4296
2-p3	5.587	2.793	22.8202
	5.587	2.793	22.8202
	5.151	3.258	28.6281
	3.398	2.793	13.8792
	5.151	2.498	16.8296
	5.028	2.303	13.9631
	5.3	3.533	34.6387
	4.806	4.363	47.9019
	6.171	2.303	17.1373
	6.145	3.911	49.2148
	6.321	3.16	33.049
	6.246	4.504	66.3433
	6.37	4.029	54.1418
	5.697	3.533	37.2334
	5.587	4.067	48.3867
	5.615	5.059	75.245
	4.806	3.748	35.3494
	5.833	4.504	61.9566
	6.246	4.773	74.5047
	5.615	3.911	44.9701
	6.043	3.577	40.4845
	4.806	4.363	47.9019
	7.999	7.284	222.215
	7.454	7.067	194.921
	8.134	6.515	180.772
	8.673	7.263	239.552
	8.727	7.761	275.232
	7.495	6.043	143.31
	8.673	6.37	184.267
	6.246	3.748	45.9409
	5.502	4.029	46.7642
	7.999	3.398	48.3594
	6.321	3.258	35.1307
	4.029	3.16	21.0654
	6.727	4.806	81.3556
	4.504	3.577	30.1741
	6.515	4.029	55.3742
	4.363	3.577	29.2295
	5.151	3.577	34.5087
	4.363	3.258	24.2486
	4.607	4.607	51.198
	3.577	2.793	14.6103
	3.258	2.37	9.58178
	3.16	2.37	9.29357
	4.997	3.009	23.6893
	3.911	2.793	15.9745
	3.533	3.16	18.4721
	5.151	4.029	43.7809
	7.284	5.697	123.783
	5.697	5.697	96.8138
	5.587	5.028	73.955
	6.727	5.028	89.0452
	4.504	2.303	12.5079
	8.528	6.515	189.529
	4.806	4.363	47.9019
	7.781	5.502	123.332
	3.95	3.95	32.2693
	3.748	2.014	7.96007
	4.363	2.498	14.255
	5.151	2.793	21.0393
	4.363	3.577	29.2295
	3.577	2.793	14.6103
	4.029	3.16	21.0654
	2.793	2.793	11.4081
	3.95	3.533	25.8156
	7.263	6.171	144.819
	7.454	5.752	129.13
	7.284	5.939	134.523
	4.029	3.95	32.9147
	4.067	3.748	29.9138
	4.74	3.577	31.7552
	5.587	4.74	65.7255
	5.752	3.258	31.9683
	6.796	5.833	121.07
	7.901	6.246	161.393
3-p1	4.714	2.325	13.3424
	2.74	2.451	8.61858
	3.195	2.951	14.5683
	5.502	1.733	8.652
	4.714	4.714	54.8488
	5.17	4.28	49.588
	4.28	2.74	16.8246
	4.519	3.509	29.1345
	4.418	4.28	42.3752
	4.28	3.195	22.8762
3-p2	4.714	3.676	33.3533
	4.65	3.1	23.3978
3-p3	5.507	2.451	17.3221
	4.173	2.74	16.4039
	5.48	4.418	56.0055
	5.052	2.259	13.4988
	3.952	3.502	25.3774
	2.74	2.74	10.7709
	6.599	5.642	109.987
	3.952	2.74	15.5352
3-a1	4.418	3.466	27.7895
	3.195	2.451	10.0498
	6.028	3.836	46.4439
	4.962	4.384	49.934
	2.74	2.74	10.7709
	3.875	2.74	15.2325
	3.952	2.74	15.5352
	5.507	3.875	43.2969
	5.721	3.333	33.2768
	5.589	3.466	35.1552
	6.391	3.952	52.2638
	4.28	2.74	16.8246
	6.127	3.875	48.1715
	4.418	3.333	25.6977
	6.053	3.99	50.4563
3-a2	5.425	4.714	63.1215
	3.952	3.1	19.8856
	4.418	3.509	28.4834
	5.509	3.99	45.9216
	3.875	3.676	27.4171
	6.414	4.28	61.5198
	4.682	3.875	36.8106
	5.589	4.682	64.1498
	3.509	2.325	9.9318
	5.052	4.714	58.7816
	7.018	5.825	124.682
	3.539	4.418	36.1685
	4.65	3.952	38.0264
	7.672	4.418	78.4077
	6.576	4.418	67.2066
	4.714	3.676	33.3533
	6.2	5.48	97.4881
4-p1	5.48	3.509	35.3302
	6.599	4.173	60.1691
	5.17	3.1	26.0143
	5.052	2.74	19.8593
	4.173	3.288	23.6217
	3.952	3.195	21.1231
	5.507	4.173	50.2123
	4.418	3.509	28.4834
	6.208	4.384	62.4729
	3.466	3.333	20.1603
	8.238	4.962	106.202
	5.17	3.952	42.2788
4-a1	5.17	3.952	42.2788
	3.952	3.952	32.3184
	4.901	4.28	47.0079
	3.195	2.325	9.04306
	4.173	3.509	26.9038
	3.952	2.951	18.02
	4.932	3.333	28.6875
	3.875	2.794	15.8388
	4.384	3.333	25.5
	5.721	3.99	47.6888
	4.173	3.195	22.3043
	5.199	3.466	32.7021
	4.682	3.875	36.8106
4-a2	4.45	3.053	21.7176
	3.98	3.514	25.7327
	3.77	2.73	14.7118
	5.39	3.379	32.2228
	7.304	6.826	178.194
	7.175	5.221	102.407
	4.553	4.096	39.996
	4.371	3.514	28.2607
	7.493	5.396	114.235
	3.891	3.514	25.1573
	4.754	3.091	23.7824
	3.98	3.891	31.5503
	6.348	4.317	61.9441
	4.344	2.896	19.0759
	6.348	5.309	93.683
	4.45	3.091	22.2616
	3.77	3.091	18.8598
	4.317	3.238	23.6992
	4.152	3.091	20.7708
	5.892	4.45	61.0916
	4.827	3.413	29.4407

## Sheet: 1890 non hs
2-p1	4.394	2.779	17.7679
	5.033	2.516	16.682
1-p1	4.985	3.324	28.8394
	4.11	2.689	15.5604
	4.081	2.28	11.108
	4.461	2.934	20.1072
	4.595	2.435	14.2653
	5.043	4.35	49.965
1-p3	4.033	2.704	15.4397
	3.941	2.137	9.42354
	4.275	2.737	16.7681
	4.78	3.653	33.3984
	4.056	2.6	14.3563
	3.941	2.565	13.5762
	5.023	4.296	48.5389
	5.475	3.023	26.1975
	3.627	3.447	22.5647
	4.624	3.941	37.6036
	3.941	2.737	15.458
	5.004	3.42	30.6456
	6.539	4.275	62.5723
	5.574	4.463	58.1325
1-a1	5.084	2.599	17.9811
	5.359	3.789	40.2839
	3.877	2.599	13.7122
	3.789	2.013	8.03916
	3.512	2.5	11.493
	4.54	2.877	19.6759
	4.11	2.906	18.1732
	3.722	2.055	8.22998
	3.676	3.512	23.7401
	4.069	1.744	6.48006
	4.191	3.288	23.7236
	3.389	2.5	11.0905
	3.487	2.325	9.86953
	3.877	3.314	22.2946
	4.793	3.13	24.5864
	4.191	3.512	27.0661
	4.291	2.757	17.0778
	3.314	2.964	15.2443
	4.191	2.466	13.3445
	4.369	2.964	20.0973
	4.686	2.325	13.2632
	4.291	2.096	9.87051
	3.789	2.599	13.401
	3.512	2.757	13.9774
	3.314	2.466	10.5521
	4.232	2.632	15.3503
1-a2	4.11	2.632	14.9078
	3.536	2.632	12.8257
	3.722	2.5	12.1802
	5.084	2.992	23.8302
	4.793	2.599	16.9519
	3.314	2.632	12.0205
	5.529	2.757	22.0049
	6.498	3.487	41.3697
	5.841	3.676	41.3273
	5.359	3.21	28.913
	5.406	2.992	25.3395
	5.984	3.13	30.6958
	5.984	3.889	47.3878
2-p2	4.831	3.705	34.7226
	8.102	5.842	144.782
	6.541	3.891	51.852
	6.693	3.95	54.6781
	5.124	3.559	33.9832
2-p3	4.904	3.191	26.1458
	5.183	2.514	17.1518
	7.123	3.378	42.558
	4.777	2.549	16.2515
	5.063	2.443	15.8217
2-a1	4.273	2.095	9.81973
	4.777	2.683	18.0051
	6.717	4.628	75.3287
	5.999	3.455	37.495
	3.378	3.021	16.1421
	3.771	2.549	12.8291
	5.463	2.963	25.1127
	5.333	4.19	49.0228
	4.74	2.37	13.9403
	4.314	3.021	20.6149
	4.777	3.272	26.7781
2-a2	4.314	2.683	16.26
	3.191	2.811	13.2022
	4.777	3.748	35.1361
	4.628	3.455	28.926
	5.045	3.455	31.5323
	3.378	3.191	18.0099
2-a3	6.382	4.374	63.9312
	3.748	2.65	13.7813
	4.454	3.378	26.6114
	3.748	3.378	22.3933
	4.777	3.748	35.1361
	4.863	3.191	25.9273
	5.028	3.771	37.4375
	4.904	3.021	23.4342
	4.685	3.378	27.9916
	6.229	4.19	57.2592
	5.463	2.549	18.5853
	5.097	3.378	30.4532
	5.25	5.045	69.9649
	5.999	3.58	40.2572
3-p3	5.637	5.366	84.9861
	8.005	5.097	108.89
	5.59	4.127	49.8516
	6.229	3.863	48.6706
	5.063	4.19	46.5409
	4.628	3.794	34.8808
	5.097	2.549	17.3402
3-a1	5.699	3.378	34.05
	5.097	3.378	30.4532
	5.463	4.314	53.2341
	4.19	3.05	20.4086
	5.045	3.272	28.2805
	4.685	3.05	22.8196
	4.314	3.191	23.0002
3-a2	3.975	3.272	22.2824
	4.314	3.352	25.3797
	4.685	3.05	22.8196
	3.863	2.963	17.7577
	6.285	4.211	58.3545
	4.904	3.378	29.3001
	4.19	3.604	28.4959
	4.19	3.021	20.0223
	3.771	3.05	18.3677
	4.127	3.021	19.7213
	5.063	4.532	54.4486
	3.378	3.352	19.8731
	3.863	3.352	22.7264
	3.794	3.58	25.4602
3-a3	3.352	2.963	15.4087
	2.963	2.963	13.6205
	4.19	3.272	23.4876
	4.127	2.811	17.0748
	4.374	4.127	39.0073
	3.378	3.352	19.8731
4-p2	6.11	3.877	48.0874
	3.899	3.314	22.4211
	4.949	4.949	63.4674
	5.928	3.536	38.8089
	5.984	1.838	10.5848
	5.084	2.5	16.6374
	4.949	2.466	15.758
	3.877	2.757	15.4301
4-a1	4.13	2.757	16.437
	4.446	3.21	23.9871
	4.793	3.512	30.9539
	4.11	3.536	26.907
	5.483	4.291	52.8608
	4.966	2.964	22.8435
4-a2	3.512	2.599	12.4213
	4.13	2.906	18.2616
	5.483	3.314	31.5298
	4.291	2.5	14.0423
	3.789	3.13	19.4362
	4.427	3.13	22.7089
	4.686	2.964	21.5555
	3.487	2.632	12.648
	3.789	2.5	12.3995
	3.699	3.288	20.9385
	5.263	3.536	34.4553
	3.877	2.906	17.143
