# Supplementary material for: De novo apical domain formation inside the Drosophila adult midgut epithelium
Source: eLife. 2022 Sep 28;11:e76366. doi: 10.7554/eLife.76366 (PMC9545526; doi:10.7554/eLife.76366)
Supplement: Figure 2—figure supplement 1—source data 2. [file elife-76366-fig2-figsupp1-data2.xlsx]

## Sheet: Sheet1
Ctrl	HS
13	9
2	6
0	23
1	16
2	22
2	11
6	31
14	16
2	21
8	25
11	49
4	17
1	25
2	51
4	19
3	22
3	58
12	54
0	34
5	18
2	30
14	34
2	19
17	4
2	17
2	20
8	30
3	17
4	21
0	25
4	39
2	26
4	30
4	19
3	27
4	19
3	28
2	54
2	22
3	67
1	25
3	41
2	28
2	69
3	16
10	26
1
3
2
2
5
2
1
0
3
1
6
