# Supplementary material for: De novo apical domain formation inside the Drosophila adult midgut epithelium
Source: eLife. 2022 Sep 28;11:e76366. doi: 10.7554/eLife.76366 (PMC9545526; doi:10.7554/eLife.76366)
Supplement: Figure 4—source data 1. [file elife-76366-fig4-data1.xlsx]

## Sheet: 4c left
X	actin	arm	cno
0	1205.2	370.959	192.935
0.15	1448.94	475.615	191.089
0.3	1622.48	473.023	218.134
0.45	1535.11	469.24	241.448
0.6	1672.07	769.016	247.208
0.75	1624.63	853.528	294.196
0.9	1457.12	783.934	267.068
1.05	1315.04	882.761	295.329
1.2	1267.1	830.893	287.717		actin/arm/cno
1.35	1180.46	783.601	284.736
1.5	1234.96	764.436	247.26
1.65	1137.71	735.148	264.098
1.8	1256.33	747.559	253.334
1.95	1224.73	805.614	266.637
2.1	1193.81	865.356	265.008
2.25	1201.25	1032.85	292.792
2.4	1303.69	1217.06	354.562
2.55	1351.85	1213.69	388.792
2.7	1313.78	1317.01	398.996
2.85	1275.77	1063.21	390.093
3	1229.89	1022.07	374.196
3.15	1221.02	1116.05	385.522
3.3	1201.51	1225.04	404.376
3.45	1161.64	1586.54	393.346
3.6	1216.98	1950.1	397.366
3.75	1072.94	1872.9	386.385
3.9	993.628	1806.67	340.708
4.05	882.386	1675.44	332.835
4.2	862.767	1457.54	354.928
4.35	908.244	1456.35	403.339
4.5	865.561	1165.58	386.748
4.65	931.724	1416.37	396.406
4.8	910.839	1429.66	395.911
4.95	810.027	1417.11	378.939
5.1	898.059	1510.84	458.897
5.25	846.216	1554.72	396.367
5.4	794.408	1453.58	385.493
5.55	910.563	1424.7	445.563
5.7	847.481	1384.26	425.384
5.85	901.95	1406.17	424.226
6	960.939	1372.68	407.829
6.15	1021.41	1704.58	495.964
6.3	890.971	1448.02	394.642
6.45	799.312	1547.28	340.219
6.6	756.996	1741.32	380.546
6.75	795.442	1917.01	363.288
6.9	740.321	1850.92	373.834
7.05	767.71	1949.73	389.911
7.2	798.99	1946.99	367.048
7.35	750.042	2119.98	368.153
7.5	717.982	1906.86	324.022
7.65	748.716	1968.28	320.577
7.8	741.201	1997.47	439.703
7.95	681.934	1837.84	345.183
8.1	627.234	1746.23	340.518
8.25	638.272	1720.3	330.117
8.4	601.396	1719.07	317.768
8.55	581.562	1485.71	297.472
8.7	574.34	1383.89	303.173
8.85	520.56	1005.47	312.895
9	484.864	933.246	289.166
9.15	510.434	1109.8	331.869
9.3	465.223	899.84	306.223
9.45	437.218	966.745	306.387
9.6	434.286	1054.69	293.302
9.75	448.281	1169.88	371.835
9.9	426.556	964.778	323.984
10.05	443.655	909.232	274.307
10.2	465.85	841.905	311.785
10.35	502.242	1132.91	315.998
10.5	477.204	1036.39	315.655
10.65	493.468	1157.14	358.861
10.8	510.921	1235.71	403.777
10.95	513.641	1370.81	446.82
11.1	500.585	1246.22	436.842
11.25	546.386	1275.43	421.937
11.4	540.131	1129.77	467.49
11.55	511.692	1193.53	486.866
11.7	535.146	1169.22	532.821
11.85	595.303	1276.43	614.104
12	610.493	1081.37	679.819
12.15	580.409	1030.39	651.72
12.3	588.576	958.378	717.033
12.45	632.764	969.414	744.212
12.6	649.026	832.372	867.308
12.75	733.66	907.36	978.234
12.9	751.73	714.085	869.704
13.05	797.74	701.068	1006.02
13.2	831.847	724.466	1024.22
13.35	893.797	694.104	1016.03
13.5	1103.94	757.753	1068.87
13.65	1194.01	815.698	1317.99
13.8	1345.22	836.024	1273.88
13.95	1587.64	834.527	1292.14
14.1	1973.43	778.923	1348.09
14.25	2295.87	710.406	1585.98
14.4	2227.96	771.099	1434.72
14.55	2731.23	626.558	1952.1
14.7	2891.59	627.747	2012.07
14.85	2925.33	604.842	2045.49
15	2885.95	684.792	2202.7
15.15	2899.5	634.225	1887.65
15.3	2980.96	538.553	1426.26
15.45	3149.52	682.711	1862.38
15.6	3058.85	576.95	1508.95
15.75	2968.21	654.245	1612.25
15.9	3063.52	721.047	1805.81
16.05	3105.99	753.517	1697.91
16.2	3144.01	741.178	1775.25
16.35	3158.75	698.413	1842.62
16.5	3699.25	746.717	2099.45
16.65	3223.77	727.754	2198.92
16.8	3359.48	777.108	2360.03
16.95	3292.35	732.053	2001.41
17.1	3900.16	872.862	2731.03
17.25	3365.94	771.04	2118.71
17.4	3943.91	838.973	2773.83
17.55	3593.37	731.528	2316.13
17.7	3355.94	801.74	2438.62
17.85	3577.84	660.793	2547.15
18	3762.45	815.228	2473.81
18.15	3784.31	565.912	2218.56
18.3	3734.51	586.904	2420.35
18.45	3736.43	590.06	2286.4
18.6	3617.1	573.671	2175.12
18.75	3762.98	557.711	1726.94
18.9	3613.04	573.972	1946.2
19.05	3562.71	582.133	1998.33
19.2	3600.37	546.608	2075.32
19.35	3551.81	630.611	2125.84
19.5	3510	568.944	2215.09
19.65	3608.97	575.58	2238.44
19.8	3542.96	650.261	2461.8
19.95	3694.34	661.771	2208.54
20.1	3623.23	636.723	1813.3
20.25	3513.81	766.728	1680.25
20.4	4074.2	735.854	2021.73
20.55	3634.23	934.813	1727.49
20.7	3578.13	845.368	1668.82
20.85	3842.99	617.798	1732.18
21	3485.56	695.004	1988.28
21.15	3482.86	723.169	2132.16
21.3	3480	751.208	2086.43
21.45	3474.71	785.346	2025
21.6	3471.52	824.386	1991.4
21.75	3922.79	622.385	1977.31
21.9	3462.36	697.475	2058.98
22.05	3421.93	667.358	1934.91
22.2	3329.15	662.589	1727.78
22.35	3176.06	650.786	1738.37
22.5	3526.62	702.305	2004.9
22.65	2968.19	633.529	1508.94
22.8	2615.23	629.314	1285.7
22.95	2975.4	748.475	1674.22
23.1	2065.08	658.124	1234.93
23.25	1818.53	698.064	1046.95
23.4	1685.16	742.229	889.442
23.55	1449.17	852.841	772.775
23.7	1221.24	941.434	647.352
23.85	1017.15	922.2	511.667
24	851.035	926.652	507.889
24.15	718.151	999.764	488.658
24.3	634.606	1070.61	476.715
24.45	572.429	1028.99	489.127
24.6	549.394	927.575	479.288
24.75	562.849	898.404	446.82
24.9	563.934	910.056	440.3
25.05	595.032	956.791	440.481
25.2	628.33	910.097	437.592
25.35	598.075	830.837	425.027
25.5	593.389	756.612	409.898
25.65	632.749	758.156	501.695
25.8	744.744	1032.25	710.357
25.95	626.164	1087.66	585.55
26.1	702.005	900.596	610.719
26.25	659.578	1246.05	682.514
26.4	549.941	989.477	303.924
26.55	461.182	991.707	258.141
26.7	553.53	1170.75	412.985
26.85	452.567	970.433	217.189
27	392.259	1024.41	206.873
27.15	380.784	1055.73	213.425
27.3	455.168	1145.69	241.532
27.45	392.358	1029.13	238.624
27.6	416.001	1071.85	200.38
27.75	396.307	1221.74	213.432
27.9	387.297	1257.49	238.582
28.05	419.596	1416.28	263.03
28.2	446.005	1228.34	220.777
28.35	460.605	1298.51	224.327
28.5	466.816	1299.68	257.901
28.65	483.69	1211.91	237.663
28.8	537.427	1079.62	220.455
28.95	590.117	1056.07	231.74
29.1	612.181	1100.54	227.44
29.25	613.823	1281.54	244.914
29.4	618.732	1425.72	219.553
29.55	630.684	1428.08	240.955
29.7	598.618	1472.59	213.518
29.85	616.82	1498.56	238.869
30	625.044	1653.45	242.978
30.15	604.615	1773.2	208.77
30.3	607.384	1840.3	207.522
30.45	582.656	1769.7	234.835
30.6	581.105	1540.38	220.991
30.75	554.3	1561.97	211.717
30.9	511.949	1778.53	183.866
31.05	552.131	1902.08	174.593
31.2	569.475	1878.19	176.086
31.35	571.068	1889.23	167.872
31.5	571.077	1915.94	173.666
31.65	576.814	1762.87	193.548
31.8	576.612	1689.8	179.768
31.95	587.243	1710.12	204.275
32.1	612.614	1821.43	201.725
32.25	630.152	1932.89	193.945
32.4	622.174	1961.27	184.476
32.55	614.597	1821.98	192.275
32.7	638.947	1702.1	232.185
32.85	658.565	1675.15	237.896
33	673.696	1693.46	204.343
33.15	697.306	1568.57	198.032
33.3	696.394	1386.32	219.034
33.45	695.899	1272.95	220.396
33.6	692.323	1217.94	210.158
33.75	701.834	1247.03	226.061
33.9	684.501	1311.28	245.387
34.05	658.38	1451.55	226.905
34.2	648.853	1632.71	213.065
34.35	641.571	1677.93	216.54
34.5	648.44	1497.51	223.254
34.65	632.12	1346.68	231.159
34.8	594.325	1358.66	237.099
34.95	582.369	1489.08	253.728
35.1	589.214	1707.9	275
35.25	608.227	1833.55	261.532
35.4	625.626	1749.62	239.43
35.55	631.644	1744.1	235.134
35.7	637.298	1894.74	216.577
35.85	646.634	1956.6	216.179
36	664.041	1644.26	223.711
36.15	705.167	2320.85	233.182
36.3	673.264	1608.51	184.918
36.45	700.141	1584.76	197.011
36.6	686.418	1703.07	229.995
36.75	682.177	1619.96	259.103
36.9	731.462	1666.15	266.652
37.05	770.455	1622.17	246.635
37.2	864.514	1771.97	261.159
37.35	849.255	1623.8	262.188
37.5	836.842	1490.55	226.185
37.65	836.257	1551.37	205.662
37.8	826.967	1634.46	201.79
37.95	814.526	1645.85	196.117
38.1	862.691	1698.63	195.875
38.25	884.951	1842.45	225.583
38.4	856.68	1949.3	226.114
38.55	891.796	1927.5	178.539
38.7	949.743	1986.01	199.19
38.85	996.441	2033.3	240.663
39	1122.49	1915.75	230.593
39.15	1227.86	1714.65	217.012
39.3	1258.58	1437.63	235.972
39.45	1282.42	1129.48	213.715
39.6	1317.47	870.84	208.844
39.75	1368.54	680.172	227.975
39.9	1389.45	561.556	223.763
40.05	1334.16	509.7	194.656

## Sheet: 4c right
X	actin	arm	cno
0	942.538	395.047	156.6
0.15	1076.96	465.607	166.826
0.3	1335.58	525.828	174.679
0.45	1390.65	610.24	225.988
0.6	1357.17	754.89	218.974
0.75	1325.55	967.469	202.15
0.9	1301.94	1242.99	233.475
1.05	1275.02	1551.87	242.165		actin/arm/cno
1.2	1202.81	1792.79	231.749
1.35	1066.54	1973.95	243.114
1.5	976.587	2024.98	234.922
1.65	921.085	1912.77	186.987
1.8	851.826	1887.72	202.357
1.95	845.356	1876.68	236.805
2.1	860.837	1750.45	209.753
2.25	811.483	1625.58	192.089
2.4	793.558	1617.35	198.855
2.55	797.67	1573.78	201.495
2.7	815.889	1461.93	200.567
2.85	808.863	1449.03	225.366
3	806.104	1505.22	251.525
3.15	785.493	1594.15	251.707
3.3	746.988	1655.14	260.056
3.45	700.51	1635.98	262.49
3.6	684.559	1672.48	240.996
3.75	697.413	1631.38	208.819
3.9	668.144	1538.01	193.07
4.05	685.547	1538.83	201.997
4.2	693.707	1838.91	217.315
4.35	678.179	2058.36	216.422
4.5	668.09	1955.49	221.403
4.65	669.557	1842.13	232.168
4.8	657.981	1937.99	261.923
4.95	622.646	1635.37	255.416
5.1	598.838	1821.25	277.59
5.25	582.12	1524.12	260.482
5.4	587.96	1386.69	239.315
5.55	619.065	1331.29	232.056
5.7	650.798	1437.14	226.323
5.85	643.106	1636.6	217.482
6	644.186	1685.11	214.048
6.15	657.128	1501.62	219.476
6.3	672.657	1344.19	241.64
6.45	701.574	1255.59	238.067
6.6	697.155	1226.29	209.689
6.75	690.889	1240.31	215.682
6.9	699.455	1351.94	222.815
7.05	694.872	1500.42	206.003
7.2	686.994	1674.41	196.155
7.35	657.886	1696.03	226.25
7.5	649.165	1675.82	242.184
7.65	620.665	1777.66	206.276
7.8	614.791	1917.26	180.161
7.95	630.378	1972.58	191.65
8.1	621.37	1855.5	199.078
8.25	595.302	1747.87	204.44
8.4	577.675	1679.77	192.155
8.55	576.143	1730.91	179.888
8.7	574.368	1854.23	191
8.85	569.389	1934.54	161.977
9	571.137	1861.18	174.804
9.15	560.284	1898.06	175.993
9.3	528.88	1844.53	178.387
9.45	524.444	1643.41	199.838
9.6	580.999	1513.88	221.672
9.75	581.896	1661.95	227.295
9.9	594.781	1850.98	225.159
10.05	611.519	1803.77	200.484
10.2	611.613	1703.45	228.617
10.35	626.902	1559.24	246.853
10.5	608.341	1450.36	222.343
10.65	599.829	1478.73	206.222
10.8	599.292	1455.55	219.264
10.95	633.171	1214.65	234.735
11.1	624.249	1041.64	229.049
11.25	594.202	1017.65	229.494
11.4	536.667	1063.44	215.422
11.55	483.784	1204.64	233.447
11.7	472.782	1280.14	252.708
11.85	464.839	1251.31	222.314
12	449.537	1165.6	221.186
12.15	436.679	1127.91	245.241
12.3	412.882	1178.82	237.554
12.45	407.337	1117.81	212.742
12.6	411.084	1009.27	217.707
12.75	385.701	977.577	234.508
12.9	379.335	962.982	227.862
13.05	405.998	918.652	228.472
13.2	434.718	905.953	227.299
13.35	474.417	949.921	245.855
13.5	528.338	953.171	261.423
13.65	582.597	916.35	305.341
13.8	620.637	987.183	413.309
13.95	704.73	1152.06	549.018
14.1	813.766	1227.29	692.847
14.25	889.822	715.52	1051.95
14.4	949.564	878.429	1120.12
14.55	1081.04	728.5	1247.01
14.7	930.568	503.636	1018.91
14.85	1045.69	489.831	1352.05
15	952.699	491.514	1047.9
15.15	1101.28	449.681	1485.56
15.3	944.703	428.851	976.521
15.45	937.72	400.819	906.054
15.6	975.795	382.523	936.094
15.75	953.852	426.363	870.053
15.9	963.31	363.795	891.093
16.05	1011.96	403.776	795.119
16.2	1066.84	382.611	713.561
16.35	1154.4	385.011	657.11
16.5	1274.28	430.92	715.839
16.65	1234.99	429.166	756.342
16.8	1261.53	409.208	653.863
16.95	1070.72	424.94	735.466
17.1	1092.7	487.923	807.072
17.25	1143.23	424.809	809.129
17.4	1176.28	450.625	735.929
17.55	1308.67	483.881	860.042
17.7	1182.84	387.512	705.87
17.85	1201.66	467.67	711.981
18	1428.71	488.829	651.059
18.15	1454.62	449.405	678.327
18.3	1642.32	394.682	622.745
18.45	1734.37	428.487	786.051
18.6	1776.92	410.622	611.584
18.75	1740.76	407.005	645.538
18.9	1884.87	379.259	655.67
19.05	2196.61	367.861	749.681
19.2	2117.85	348.948	710.05
19.35	2017.9	409.774	769.777
19.5	1831.12	431.956	780.49
19.65	1692.84	435.098	823.053
19.8	1772.09	416.167	879.646
19.95	1970.19	374.498	912.052
20.1	2052.89	342.534	1029.05
20.25	2082.06	340.788	1036.01
20.4	2198.99	339.523	972.289
20.55	2393.99	321.918	917.003
20.7	2531.64	317.215	930.883
20.85	2555.21	335.408	883.465
21	2499.53	323.341	864.455
21.15	2525.28	310.423	828.395
21.3	2457.28	281.851	873.787
21.45	2309.77	297.728	969.212
21.6	2835.75	345.644	1529.64
21.75	2153.52	326.825	969.143
21.9	2261.54	351.998	894.429
22.05	2277.06	355.621	992.086
22.2	2399.64	347.603	1671.73
22.35	2209.09	350.87	1392.3
22.5	2395.94	354.641	1362.15
22.65	2116.23	332.097	1518.15
22.8	2072.97	343.616	1711.18
22.95	1755.76	354.345	1277.77
23.1	1823.21	332.241	1269.22
23.25	1342.57	387.03	983.755
23.4	1155.59	398.569	853.392
23.55	886.522	400.465	680.175
23.7	855.548	418.323	737.991
23.85	781.204	389.134	697.905
24	682.585	457.453	584.43
24.15	628.645	599.951	529.072
24.3	558.952	550.055	471.375
24.45	520.552	530.427	357.326
24.6	479.486	596.619	306.95
24.75	448.668	590.037	337.922
24.9	444.825	625.115	261.489
25.05	449.042	686.186	299.559
25.2	458.493	760.138	300.542
25.35	468.33	794.515	289.126
25.5	483.944	1030.1	255.569
25.65	471.931	1094.88	280.276
25.8	464.902	1199.5	259.081
25.95	459.946	1157.04	275.634
26.1	455.811	1162.41	273.961
26.25	447.197	1161.01	239.653
26.4	434.113	949.476	268.704
26.55	443.055	928.803	268.642
26.7	443.326	975.668	250.805
26.85	453.231	1025.49	272.398
27	448.704	1047.57	288.396
27.15	450.803	1054.02	274.75
27.3	428.393	1034.15	256.159
27.45	481.588	1090.41	275.471
27.6	411.042	1000.14	284.922
27.75	417.969	894.717	245.921
27.9	445.981	904.86	250.952
28.05	424.186	867.506	219.966
28.2	429.128	918.389	207.803
28.35	436.116	1054.82	187.922
28.5	447.675	1105.27	205.955
28.65	424.67	975.342	236.436
28.8	434.529	930.861	224.125
28.95	435.797	919.169	230.947
29.1	487.096	1235.18	221.434
29.25	397.362	978.486	267.774
29.4	369.975	1025.35	235.584
29.55	410.18	1053.16	179.485
29.7	454.826	1105.17	239.304
29.85	431.68	712.1	188.252
30	429.911	670.61	231.856
30.15	426.579	751.125	231.594
30.3	435.74	891.283	230.968
30.45	459.39	977.359	238.235
30.6	492.836	977.939	226.93
30.75	498.512	924.947	217.915
30.9	484.112	933.714	243.701
31.05	476.291	960.865	241.064
31.2	477.416	1033.55	262.863
31.35	483.476	1164.61	240.85
31.5	485.261	1125.13	244.422
31.65	473.177	1080.44	245.588
31.8	486.602	1223.64	222.182
31.95	524.351	1348.38	225.604
32.1	534.257	1163.74	227.199
32.25	543.425	961.548	261.059
32.4	564.942	810.037	239.468
32.55	595.109	780.88	239.358
32.7	619.94	863.259	245.86
32.85	623.079	874.948	249.01
33	629.951	797.232	230.095
33.15	684.162	774.006	225.752
33.3	708.002	893.022	256.864
33.45	728.975	838.071	239.458
33.6	802.517	712.809	245.743
33.75	850.838	717.692	246.125
33.9	854.189	683.661	216.168
34.05	893.112	678.169	221.986
34.2	938.462	745.503	244.409
34.35	963.159	778.08	260.957
34.5	973.53	777.436	207.52
34.65	931.648	749.341	217.988
34.8	873.057	731.796	226.27
34.95	976.926	783.128	225.101
35.1	885.41	782.348	197.155
35.25	819.988	730.628	215.718
35.4	817.462	786.683	220.267
35.55	785.879	867.851	222.559
35.7	765.202	847.621	207.492
35.85	970.937	818.664	268.709
36	765.274	891.872	206.649
36.15	763.627	906.63	215.555
36.3	732.72	896.758	202.286
36.45	830.622	834.771	208.661
36.6	876.127	808.499	250.439
36.75	830.598	1046.45	234.204
36.9	843.039	886.262	223.048
37.05	883.396	885.944	203.163
37.2	919.985	1084.28	203
37.35	954.62	1207.35	222.889
37.5	984.158	1242.9	225.03
37.65	996.87	1310.87	214.353
37.8	1037.08	1349.65	191.881
37.95	1080.35	1369.98	202.912
38.1	975.779	1249.83	173.775
38.25	998.037	1177.31	203.539
38.4	1050.02	1189.45	204.932
38.55	1039.61	1210.04	203.207
38.7	1035	1321.99	212.308
38.85	1042.89	1428.07	256.036
39	1095.06	1848.66	233.179
39.15	1007.54	1825.49	234.418
39.3	974.819	1838.87	229.319
39.45	1013.73	1477.48	221.447
39.6	1040.99	1275.85	243.664
39.75	1127.05	1341.66	256.788
39.9	1186.22	1426.65	248.947
40.05	1194.38	1392.8	227.082
40.2	1178.87	1249.43	233.628
40.35	1175.14	1029.83	182.707
40.5	1117.01	895.768	224.293
40.65	1068.92	813.994	252.31
40.8	942.228	602.428	182.674

## Sheet: 4a
X	Ecad	cno	cora
0	809.723	125.759	172.011
0.091	785.617	130.68	175.588
0.182	818.524	138.816	171.22
0.273	838.072	135.774	182.937
0.364	860.739	123.498	166.974
0.455	922.377	126.041	167.823
0.546	939.006	115.254	162.613
0.637	964.251	117.911	150.667
0.728	955.347	111.147	161.903
0.819	920.213	111.364	145.312		X	Y
0.91	901.811	108.284	144.211		microns	Ecad/cno/cora
1.001	957.904	108.5	150.52
1.092	927.673	110.886	143.495
1.183	923.028	113.314	136.336
1.274	928.769	114.791	130.759
1.365	977.676	126.511	141.839
1.456	954.972	121.415	133.512
1.547	1039.42	135.17	136.042
1.638	1079.24	130.186	138.339
1.729	1085.89	134.128	135.761
1.82	1088.93	137.813	140.489
1.911	1137.6	130.051	135.063
2.002	1127.55	128.391	141.243
2.093	1108.23	121.953	138.828
2.184	1201.89	126.971	153.048
2.275	1083.25	122.274	139.888
2.366	1058.93	126.476	152.883
2.457	1085.05	130.554	160.303
2.548	1135.93	136.181	140.631
2.639	1023.57	131.159	154.239
2.73	993.004	127.237	151.951
2.821	917.413	118.876	153.797
2.912	904.357	115.345	154.937
3.003	875.481	109.224	150.658
3.094	877.265	108.767	149.408
3.185	910.369	109.377	150.17
3.276	924.721	112.534	152.001
3.367	998.363	111.469	156.325
3.458	955.21	114.312	156.679
3.549	965.607	117.491	159.738
3.64	1007.89	121.544	140.588
3.731	998.613	129.211	155.539
3.822	980.207	133.995	155.645
3.913	948.717	143.774	154.679
4.004	941.992	153.418	151.251
4.095	953.25	167.184	140.198
4.186	1004.1	185.73	131.665
4.277	1033.1	173.733	128.953
4.368	1020.08	175.133	129.313
4.459	980.246	179.561	130.728
4.55	957.423	189.059	134.548
4.641	1086.29	199.548	135.21
4.732	937.476	197.858	134.357
4.823	949.801	197.822	143.048
4.914	964.355	193.748	153.679
5.005	956.35	184.762	160.662
5.096	926.824	177.064	157.542
5.187	893.257	173.429	145.88
5.278	866.739	174.758	132.079
5.369	846.033	180.298	120.043
5.46	827.85	189.67	113.59
5.551	812.139	201.401	113.176
5.642	803.468	211.892	115.831
5.733	804.172	219.866	118.537
5.824	812.283	226.732	120.066
5.915	826.505	232.779	118.776
6.006	851.764	236.832	116.483
6.097	888.297	237.67	115.838
6.188	929.734	240.024	115.734
6.279	950.838	234.397	114.407
6.37	988.268	248.15	115.325
6.461	1027.67	285.963	118.489
6.552	1044.37	311.33	121.028
6.643	1039.53	324.321	128.976
6.734	1142.07	373.532	136.377
6.825	1191	423.681	148.322
6.916	1129.06	419.739	153.416
7.007	1083.2	410.781	151.006
7.098	1013.62	407.444	149.677
7.189	909.558	380.382	145.026
7.28	874.351	358.117	132.562
7.371	876.688	366.826	138.331
7.462	880.156	331.437	125.701
7.553	909.574	321.424	127.287
7.644	995.223	336.978	132.978
7.735	1065.28	354.73	138.56
7.826	1158.35	378.861	148.038
7.917	1237.59	395.335	158.651
8.008	1264.72	434.628	154.684
8.099	1280.89	442.731	171.672
8.19	1248.27	401.07	165.046
8.281	1365.26	475.112	180.686
8.372	1288.4	389.466	170.765
8.463	1197.74	396.026	175.971
8.554	1188.57	359.229	168.997
8.645	1232.22	346.368	171.018
8.736	1310.57	358.549	184.063
8.827	1183.78	306.799	159.429
8.918	1196.68	300.907	157.401
9.009	1215.35	300.002	162.415
9.1	1211.67	280.501	162.942
9.191	1188.23	284.843	167.77
9.282	1167.41	272.208	172.431
9.373	1098.28	281.718	178.659
9.464	1006.86	264.867	175.776
9.555	989.943	258.591	169.56
9.646	1120.74	271.58	178.856
9.737	1055.99	250.359	165.445
9.828	1063.18	222.939	158.325
9.919	1053.78	215.643	158.137
10.01	1255.23	247.012	171.75
10.101	1057.77	216.401	148.048
10.192	1034.45	203.317	142.41
10.283	1028.99	210.084	136.476
10.374	1052.04	228.192	144.246
10.465	1311.45	256.392	152.069
10.556	1037.83	233.24	142.846
10.647	1057.33	246.295	145.578
10.738	1350.78	333.055	172.357
10.829	1346.22	324.676	170.851
10.92	1430.55	359.673	183.887
11.011	1549.22	399.494	207.511
11.102	1616.29	437.734	224.046
11.193	1639.52	415.87	230.665
11.284	1423.07	352.847	215.639
11.375	1238.93	310.315	188.479
11.466	1103.64	282.176	161.477
11.557	1046.65	265.491	143.403
11.648	1009.78	250.134	133.535
11.739	967.585	239.984	130.373
11.83	921.826	238.776	129.373
11.921	1017.53	257.49	134.386
12.012	936.788	253.054	128.654
12.103	1016.17	276.811	130.825
12.194	1123.1	298.177	139.405
12.285	1181.87	284.859	130.884
12.376	1200.3	275.703	143.819
12.467	1310	280.6	161.906
12.558	1299.07	262.737	165.389
12.649	1616.51	293.866	158.066
12.74	1343.4	251.741	173.423
12.831	1378.96	239.281	167.509
12.922	1506.24	243.094	153.592
13.013	1350.27	214.201	149.853
13.104	1461.48	234.294	158.773
13.195	1264.24	205.508	149.612
13.286	1380.01	221.698	155.528
13.377	1210.4	205.721	148.86
13.468	1162.43	199.22	150.369
13.559	1285.48	213.016	152.158
13.65	1327.83	241.115	163.984
13.741	1460.05	257.877	155.442
13.832	1324.29	249.784	158.473
13.923	1434.58	267.689	164.406
14.014	1475.5	292.539	173.358
14.105	1590.8	300.077	174.312
14.196	1395.65	261.116	158.62
14.287	1339.28	247.596	164.568
14.378	1468.25	256.408	176.115
14.469	1206.04	203.408	156.907
14.56	1233.48	200.318	154.917
14.651	1203.74	173.272	144.978
14.742	1183.48	168.179	151.128
14.833	1217.46	153.445	134.99
14.924	1088.38	149.094	142.755
15.015	1119.48	149.588	142.16
15.106	1240.49	154.28	143.934
15.197	1263.31	148.082	128.698
15.288	1304.77	145.978	128.273
15.379	1319.02	148.039	126.37
15.47	1378.48	150.198	123.038
15.561	1429.38	160.721	127.528
15.652	1358.69	169.837	137.669
15.743	1257.83	182.665	146.655
15.834	1183.71	199.786	149.027
15.925	1164	220.94	146.448
16.016	1138.03	232.777	142.002
16.107	1171.56	254.39	141.968
16.198	1108.59	248.579	138.743
16.289	1204.7	255.054	138.4
16.38	1252.64	260.769	136.791
16.471	1282.99	257.014	136.417
16.562	1285.25	240.225	135.514
16.653	1294.82	216.82	135.265
16.744	1392.04	211.146	134.657
16.835	1381.35	186.285	131.252
16.926	1336.77	175	128.466
17.017	1311.04	173.029	126.058
17.108	1269.64	172.45	127.427
17.199	1236.73	180.314	135.235
17.29	1223.95	200.206	147.796
17.381	1217.51	216.907	158.471
17.472	1212.17	219.26	162.471
17.563	1235.08	218.182	160.126
17.654	1291.3	224.136	156.423
17.745	1345.85	232.489	156.549
17.836	1367.36	234.259	160.47
17.927	1354.79	227.445	159.826
18.018	1335.15	215.208	156.169
18.109	1341.21	197.94	163.132
18.2	1360.29	175.31	179.929
18.291	1360.22	157.13	190.081
18.382	1340.93	146.305	184.422
18.473	1336.73	138.41	176.43
18.564	1375.1	133.433	174.728
18.655	1413.48	132.012	173.393
18.746	1401.07	132.3	162.683
18.837	1344.44	134.235	144.135
18.928	1273.48	136.48	131.513
19.019	1209.66	137.256	130.788
19.11	1168.7	136.051	137.118
19.201	1135.77	130.596	140.204
19.292	1180.7	138.766	138.487
19.383	1210.8	126.447	147.788
19.474	1197.91	121.18	138.738
19.565	1155.38	120.586	136.061
19.656	1164.16	120.088	145.267
19.747	1137.19	128.051	151.249
19.838	1151.05	134.177	159.218
19.929	1242.76	139.022	165.722
20.02	1148.34	129.639	173.824
20.111	1161.81	123.609	172.303
20.202	1304.4	129.254	182.712
20.293	1296.81	126.92	187.911
20.384	1360.05	136.417	179.838
20.475	1521.22	144.355	198.064
20.566	1362.7	138.905	191.502
20.657	1279.16	134.764	182.228
20.748	1477.32	147.662	196.034
20.839	1235.36	129.609	183.81
20.93	1144.99	124.067	181.512
21.021	1254.49	131.083	179.948
21.112	1077.05	134.177	174.427
21.203	1015.79	146.717	147.057
21.294	932.606	152.99	129.126
21.385	1127.87	150.513	156.313

## Sheet: 4b
X	Ecad	cno	cora
0	658.199	146.1	136.5
0.091	767.56	141.497	135.696
0.182	860.962	137.013	128.894
0.273	832.028	144.275	125.753
0.364	876.573	135.324	136.85
0.455	886.118	138.856	127.959
0.546	924.367	136.278	127.503
0.637	878.07	135.979	130.668
0.728	1244.38	129.155	145.115
0.819	883.278	130.025	141.956		X	Y
0.91	828.56	117.254	151.891		microns	Ecad/cno/cora
1.001	797.453	111.213	126.16
1.092	828.429	113.132	118.07
1.183	925.574	114.372	128.546
1.274	931.071	102.206	132.863
1.365	930.389	111.829	125.936
1.456	1014.27	123.145	147.897
1.547	988.746	132.156	156.969
1.638	1032.85	141.412	164.38
1.729	1111.08	160.221	156.611
1.82	1156.66	157.517	138.658
1.911	1173.95	142.998	140.528
2.002	1216.09	126.274	131.061
2.093	1288.33	112.43	145.392
2.184	1313.87	122.083	145.332
2.275	1210.46	127.364	143.547
2.366	1133.41	125.314	145.139
2.457	1196.22	134.791	144.797
2.548	1224.41	126.392	153.126
2.639	1219.03	111.43	158.57
2.73	1205.07	116.474	147.373
2.821	1202.76	131.6	144.396
2.912	1234.92	134.87	140.191
3.003	1210.05	142.084	145.716
3.094	1121.14	145.685	145.129
3.185	1121.88	145.704	146.512
3.276	1303.06	156.55	137.929
3.367	1353.3	150.988	150.014
3.458	1354.48	135.676	145.751
3.549	1337.66	125.627	135.04
3.64	1343.43	137.216	134.658
3.731	1332.02	150.023	134.208
3.822	1362.53	145.112	151.117
3.913	1367.15	131.66	144.665
4.004	1311.81	120.512	133.087
4.095	1287.88	119.8	138.475
4.186	1363.63	130.833	173.824
4.277	1360.26	148.733	185.001
4.368	1334.71	176.766	169.138
4.459	1385.08	170.977	177.927
4.55	1435.98	156.932	165.959
4.641	1359.38	146.992	158.633
4.732	1276.07	144.497	136.861
4.823	1376.38	130.448	129.873
4.914	1530.88	127.367	120.231
5.005	1501.35	128.941	127.392
5.096	1450	141.718	137.99
5.187	1385.49	146.744	144.115
5.278	1374.51	133.956	139.951
5.369	1332.16	128.599	130.187
5.46	1235.88	140.685	127.164
5.551	1250.41	141.201	137.817
5.642	1273.18	154.03	134.877
5.733	1271.63	166.742	132.461
5.824	1347.97	188.034	137.785
5.915	1330.39	200.849	139.553
6.006	1224.99	194.88	137.375
6.097	1219.07	160.65	141.074
6.188	1260.9	169.593	143.78
6.279	1466.97	181.433	154.161
6.37	1506.64	185.017	135.915
6.461	1477.81	181.423	120.674
6.552	1432.67	186.721	110.032
6.643	1489.29	176.97	111.82
6.734	1596.61	186.195	126.62
6.825	1382.54	142.397	112.442
6.916	1342.91	136.58	126.362
7.007	1315.68	130.671	137.572
7.098	1368.07	126.464	129.631
7.189	1340.85	147.765	121.208
7.28	1603.33	211.198	137.957
7.371	1220.93	185.383	116.147
7.462	1351.37	200.846	124.63
7.553	1331.5	186.476	127.893
7.644	1239.4	177.252	125.287
7.735	1277.88	169.327	106.369
7.826	1257.31	155.624	106.814
7.917	1304.87	150.496	117.923
8.008	1243.06	162.926	121.867
8.099	1286.89	182.176	125.384
8.19	1164.53	168.067	120.149
8.281	1189.14	171.873	115.744
8.372	1200.69	159.565	120.407
8.463	1199	147.903	120.975
8.554	1212.07	138.692	134.042
8.645	1094.22	145.012	128.026
8.736	1128.61	129.005	131.195
8.827	1128.74	126.987	134.741
8.918	1108.34	125.322	127.218
9.009	1161.62	133.41	123.185
9.1	1161.95	138.974	116.696
9.191	1263.24	127.796	114.465
9.282	1199.98	127.194	133.961
9.373	1202.58	148.773	117.791
9.464	1244.97	147.066	117.852
9.555	1227.91	153.15	111.13
9.646	1159.63	156.552	118.63
9.737	1039.75	151.468	120.161
9.828	1180.4	145.738	110.267
9.919	1127.35	157.847	111.097
10.01	1186.94	154.204	115.805
10.101	1232.77	144.848	120.309
10.192	1165.54	156.89	125.77
10.283	1029.92	168.4	128.673
10.374	1060.86	151.669	120.497
10.465	954.191	169.053	111.815
10.556	955.968	169.646	120.289
10.647	1014.73	201.178	128.826
10.738	1043	201.677	131.021
10.829	974.154	204.883	138.982
10.92	1101.56	208.491	145.169
11.011	1146.12	244.062	161.916
11.102	1131.52	232.861	169.744
11.193	1185.75	258.467	209.58
11.284	1239.4	391.533	224.99
11.375	1433.36	287.774	219.177
11.466	1311.62	510.106	284.36
11.557	1371.33	528.961	310.486
11.648	1582.61	588.5	346.106
11.739	1676.94	641.606	379.661
11.83	1698.13	732.376	388.651
11.921	1730.03	851.387	407.994
12.012	1745.71	945.084	461.797
12.103	1580.78	1095.67	657.552
12.194	1944.45	1087.67	700.749
12.285	2050.15	1102.92	832.982
12.376	2021.61	1155.64	1025.58
12.467	2007.66	1205.09	1221.67
12.558	2020.83	1288.09	1404.89
12.649	2082.51	1379.37	1540.23
12.74	2130.55	1437.19	1618.75
12.831	2031.35	1440.9	1671.22
12.922	1786.49	1420.88	1571.28
13.013	1654.46	1422.89	1433.3
13.104	1527.33	1720.66	1086.86
13.195	1323.41	1357.53	930.056
13.286	1205.71	1313.93	802.264
13.377	1565.17	2082.86	909.437
13.468	1239.16	1274.5	691.132
13.559	1235.97	1220.46	576.551
13.65	1341.52	1059.71	547.618
13.741	1455.25	1355.42	621.426
13.832	1246.71	907.075	477.88
13.923	1243.72	871.1	443.266
14.014	1363.53	857.147	456.892
14.105	1268.91	679.715	394.255
14.196	1466.42	743.823	476.003
14.287	1136.29	475.032	326.832
14.378	1165.12	440.999	301.17
14.469	1156.61	371.995	242.865
14.56	1064.9	292.875	197.941
14.651	1061.51	262.802	179.612
14.742	1037.17	276.196	157.719
14.833	1052.74	249.903	151.7
14.924	987.44	236.689	137.813
15.015	964.522	223.916	122.216
15.106	1038.37	270.571	133.655
15.197	883.633	226.881	121.186
15.288	1011.56	256.443	146.856
15.379	968.775	210.691	120.888
15.47	994.779	200.875	115.04
15.561	1002.95	200.09	114.343
15.652	1002.82	195.667	122.794
15.743	1008.65	204.705	111.022
15.834	985.664	175.371	115.202
15.925	1012.36	176.106	119.301
16.016	1099.57	175.532	107.694
16.107	1176.49	185.209	102.719
16.198	1174.89	202.567	107.959
16.289	1209.85	214.166	113.549
16.38	1117.9	190.371	112.652
16.471	1538.66	237.542	119.225
16.562	1137.67	172.696	104.6
16.653	1160.12	176.631	114.166
16.744	1157.29	174.547	113.225
16.835	1236.34	185.1	125.184
16.926	1202.83	188.716	102.672
17.017	1319.36	200.98	106.606
17.108	1290.46	195.99	117.126
17.199	1218.14	180.334	112.686
17.29	1225.68	193.154	113.899
17.381	1308.8	212.126	115.026
17.472	1352.28	210.604	111.66
17.563	1357.11	193.392	118.591
17.654	1366.27	164.119	130.075
17.745	1363.38	151.872	134.164
17.836	1590.39	191.235	143.815
17.927	1356.81	180.768	121.904
18.018	1431.22	188.987	119.138
18.109	1310.89	218.749	123.344
18.2	1189.3	183.462	125.885
18.291	1267.31	171.11	141.517
18.382	1115.44	167.666	135.555
18.473	1085.93	150.165	136.984
18.564	1131.71	140.337	127.815
18.655	1178.65	156.61	145.628
18.746	1153.55	165.071	131.852
18.837	1136.61	152.464	125.415
18.928	1166.35	133.221	136.808
19.019	1166.65	145.099	144.253
19.11	1139.63	165.209	127.952
19.201	1075.59	160.251	132.348
19.292	1178.8	153.219	148.289
19.383	1309.68	128.507	158.327
19.474	1287.24	136.026	130.181
19.565	1340.3	149.549	140.043
19.656	1192.04	146.828	126.623
19.747	1198.13	157.529	141.608
19.838	1181.78	148.856	137.685
19.929	1245.26	126.481	136.678
20.02	1219.67	135.518	126.048
20.111	1048.81	127.184	112.499
20.202	1008.79	131.794	123.047
20.293	907.697	136.092	114.709
20.384	1194.62	154.434	133.914
20.475	1112.62	129.814	122.367
20.566	1112.87	134.431	125.421
20.657	1108.56	164.963	132.59
20.748	1336.13	165.097	146.909
20.839	1265.91	187.718	134.865
20.93	1231.95	212.357	162.399
21.021	1248.79	190.358	167.279
21.112	1275.8	184.164	171.264
21.203	1305.85	219.75	170.051
21.294	1434.59	200.93	196.713
21.385	1426.62	214.493	182.22
21.476	1590.09	213.025	200.344
21.567	1672.19	221.164	172.941
21.658	1661.7	252.747	181.815
21.749	1855.61	281.836	202.764
21.84	1568.28	248.1	183.502
21.931	1567.4	257.328	167.321
22.022	1609.67	263.534	151.991
22.113	1470.96	255.269	138.629
22.204	1595.42	223.257	123.631
22.295	1402.67	227.398	120.914
22.386	1309.16	231.89	122.641
22.477	1655.1	249.792	127.877
22.568	1278.27	250.737	127.295
22.659	1256.93	200.604	130.331
22.75	1282.13	203.87	118.578
22.841	1606.28	224.439	119.092
22.932	1314.89	158.409	108.758
23.023	1303.74	167.715	107.538
23.114	1276.73	154.373	108.564
23.205	1241.19	146.786	108.06
23.296	1350.8	142.248	105.81
23.387	1263.9	128.208	113.537
23.478	1202.35	128.37	106.713
23.569	1244.1	121.397	98.5379
23.66	1253.97	128.57	102.445
23.751	1332.45	134.837	111.502
23.842	1210.42	132.436	115.804
23.933	1203.41	133.181	108.455
24.024	1123.65	130.808	114.277
24.115	1075.86	126.931	109.277
24.206	1071.09	122.067	113.925
24.297	1345.02	140.689	109.802
24.388	1013.11	118.494	106.385
24.479	1037.11	119.711	114.913
24.57	1081.27	124.378	124.303
24.661	1085.92	123.591	136.845
24.752	1063.53	123.476	121.284
24.843	1033.22	117.87	129.924
24.934	1101.13	108.413	130.498
25.025	1146.01	110.03	108.118
25.116	1073.35	130.53	108.564
25.207	954.554	138.145	111.099
25.298	920.546	130.624	126.182

## Sheet: 4d
X	Ecad	cno	cora
0	859.044	146.8	149.806
0.091	966.835	166.473	148.284
0.182	1078.38	173.07	163.45
0.273	1117.9	208.101	162.052
0.364	1145.54	266.648	165.477
0.455	1399.79	318.724	199.706
0.546	1287.23	322.362	187.894
0.637	1268.29	298.028	185.591
0.728	1263.11	275.987	191.131
0.819	1262.27	232.434	175.255		X	Y
0.91	1605.31	254.005	201.95		microns	Ecad/cno/cora
1.001	1405.75	218.496	174.813
1.092	1403.43	204.149	176.29
1.183	1583.98	204.787	183.357
1.274	1241.23	206.465	168.119
1.365	1194.69	198.228	158.608
1.456	1205.5	198.162	160.539
1.547	1269.8	198.786	160.955
1.638	1270.22	216.696	181.739
1.729	1421.17	211.111	193.646
1.82	1316.21	195.752	201.12
1.911	1221.86	181.895	207.987
2.002	1089.31	171.964	197.853
2.093	1371.7	185.023	222.065
2.184	1326.24	182.595	240.629
2.275	1303.47	178.722	193.504
2.366	1352.1	192.227	208.42
2.457	1310.14	198.795	228.725
2.548	1281.31	216.834	252.027
2.639	1321.56	230.224	264.778
2.73	1391.06	229.525	252.78
2.821	1429.19	232.429	250.872
2.912	1307.94	237.813	250.774
3.003	1230.37	212.718	261.139
3.094	1350.49	227.942	307.906
3.185	1274.25	237.11	293.682
3.276	1489.95	250.715	311.877
3.367	1383.64	259.363	278.364
3.458	1313.35	271.823	237.089
3.549	1118.98	268.982	209.808
3.64	1091.31	246.769	193.226
3.731	1186.22	214.903	188.247
3.822	1223.33	264.84	224.287
3.913	1027.83	200.69	182.836
4.004	933.117	199.415	179.167
4.095	932.769	207.766	173.926
4.186	1008.93	210.021	167.849
4.277	832.793	207.054	154.806
4.368	772.292	201.086	143.083
4.459	763.321	197.315	154.414
4.55	788.833	198.496	159.446
4.641	676.904	179.313	172.191
4.732	723.278	179.867	177.193
4.823	834.144	196.019	175.066
4.914	944.293	205.565	168.071
5.005	944.178	226.617	146.85
5.096	907.427	217.835	145.358
5.187	967.999	206.875	148.884
5.278	977.914	224.062	144.623
5.369	1012.4	237.149	148.498
5.46	1063.33	232.995	128.904
5.551	1191.08	222.116	148.256
5.642	1109.04	215.734	150.119
5.733	1134.57	215.016	175.837
5.824	1096.97	178.579	174.246
5.915	1454.05	238.662	171.566
6.006	1589.5	264.007	183.124
6.097	1450.59	211.429	176.324
6.188	1444.1	319.915	179.589
6.279	1337.04	280.127	182.193
6.37	1288.38	235.662	179.131
6.461	1375.03	217.301	166.754
6.552	1315.94	230.197	198.086
6.643	1237.6	216.992	213.588
6.734	1193.62	230.917	197.822
6.825	1136.21	191.73	220.051
6.916	1108.98	177.899	221.617
7.007	1209.7	180.129	235.5
7.098	1212.63	179.441	241.395
7.189	1268.69	187.034	235.45
7.28	1249.91	211.751	237.128
7.371	1255.2	223.485	219.402
7.462	1232.26	211.114	199.928
7.553	1171.09	198.536	203.99
7.644	1086.04	173.493	208.238
7.735	962.421	189.921	184.851
7.826	1041.28	154.593	202.795
7.917	980.052	144.547	175.81
8.008	1009.48	149.45	178.46
8.099	986.987	152.665	163.928
8.19	1004.4	173.652	159.468
8.281	1111.16	182.43	188.804
8.372	976.442	216.327	176.064
8.463	851.023	234.433	201.863
8.554	756.233	237.143	187.166
8.645	852.638	202.68	179.224
8.736	695.88	204.04	176.131
8.827	840.936	276.863	147.455
8.918	765.259	199.256	164.35
9.009	828.111	212.731	187.367
9.1	925.788	284.253	174.06
9.191	995.199	263.928	165.864
9.282	953.8	307.715	178.946
9.373	977.63	330.51	180.977
9.464	1006.71	271.201	176.35
9.555	1001.81	289.885	184.188
9.646	999.364	329.259	182.941
9.737	1218.73	378.666	182.475
9.828	1274.36	401.488	174.691
9.919	1300.64	340.291	175.412
10.01	1296.05	376.093	172.459
10.101	1457.04	313.984	195.034
10.192	1335.07	393.003	249.842
10.283	1374.1	270.482	197.855
10.374	1299.19	263.795	199.338
10.465	1198.68	259.506	183.365
10.556	1229.67	274.03	185.326
10.647	1561.87	458.666	254.805
10.738	1284.9	316.603	174.585
10.829	1323.79	353.455	179.262
10.92	1351.49	363.288	189.148
11.011	1373.51	367.065	202.906
11.102	1585	445.808	212.164
11.193	1406.02	396.556	170.799
11.284	1315.26	395.822	152.101
11.375	1386.65	360.797	151.463
11.466	1276.17	295.597	157.223
11.557	1247.68	259.478	163.687
11.648	1948.77	347.576	178.877
11.739	1287.1	247.745	146.218
11.83	1403.23	255.444	155.781
11.921	1487.65	238.804	167.844
12.012	1456.81	225.111	162.987
12.103	1400.91	206.768	145.878
12.194	1386.28	189.745	135.26
12.285	1328.81	180.22	140.773
12.376	1274.39	197.535	155.832
12.467	1199.61	196.46	159.4
12.558	1180.81	173.806	154.698
12.649	1134.83	167.489	157.383
12.74	1104.26	167.184	166.133
12.831	1062.82	169.744	172.005
12.922	1130.68	185.142	183.96
13.013	1040.87	168.496	176.878
13.104	1119.96	169.038	162.108
13.195	1252.07	168.03	193.484
13.286	1252.99	170.876	193.731
13.377	1357.31	159.99	207.345
13.468	1341.88	168.944	204.333
13.559	1317.3	166.796	193.353
13.65	1367.55	171.847	202.298
13.741	1333.82	170.905	198.949
13.832	1489.59	206.366	239.885
13.923	1134.1	181.019	213.439
14.014	1115.52	196.618	242.186
14.105	1225.58	235.936	246.719
14.196	1228.92	272.286	257.593
14.287	1228.32	247.202	246.661
14.378	1168.25	256.868	234.185
14.469	1116.23	306.691	271.276
14.56	1029.8	319.892	266.783
14.651	991.236	320.003	251.954
14.742	883.601	338.663	255.247
14.833	910.808	343.652	292.737
14.924	837.066	380.477	307.676
15.015	1062.27	502.194	371.502
15.106	857.242	581.265	354.888
15.197	887.139	669.155	376.984
15.288	873.965	754.943	412.855
15.379	825.341	894.914	438.213
15.47	771.852	1129.81	469.308
15.561	671.061	1398.47	506.531
15.652	569.406	1597.42	554.15
15.743	507.945	1739.28	593.986
15.834	460.784	1796.4	649.481
15.925	398.956	1786.68	688.436
16.016	391.378	1829.48	711.314
16.107	406.099	1969.35	719.835
16.198	397.695	2237.56	712.412
16.289	387.786	2400.31	685.869
16.38	342.329	1467.61	543.201
16.471	341.702	1315.24	534.457
16.562	368.708	1440.22	531.063
16.653	342.25	1165.44	522.555
16.744	325.247	1070.52	519.076
16.835	325.392	1084.21	513.907
16.926	341.375	1237.88	534.021
17.017	365.265	1394.88	569.685
17.108	338.296	875.571	430.922
17.199	343.776	1236.48	487.615
17.29	323.141	1142.87	442.536
17.381	324.173	1052.78	364.092
17.472	336.019	990.12	302.744
17.563	347.991	946.286	298.468
17.654	351.971	970.657	295.887
17.745	362.248	1112.71	314.807
17.836	388.928	1291.3	374.534
17.927	388.446	1348.17	457.368
18.018	398.723	1299.63	507.495
18.109	462.952	931.519	469.98
18.2	501.993	723.76	467.407
18.291	528.677	789.111	467.011
18.382	581.251	537.032	424.858
18.473	609.892	477.035	375.48
18.564	691.742	484.925	362.463
18.655	745.413	418.85	345.197
18.746	785.373	311.436	311.142
18.837	855.996	278.294	277.39
18.928	872.278	280.228	281.779
19.019	822.268	242.902	231.398
19.11	784.164	219.844	217.947
19.201	929.358	212.291	226.623
19.292	846.162	183.5	195.376
19.383	872.284	196.293	209.062
19.474	948.22	194.174	220.533
19.565	890.574	193.708	208.098
19.656	875.002	184.97	219
19.747	851.408	172.501	208.586
19.838	933.475	178.04	201.865
19.929	1030.32	193.551	237.315
20.02	1087.47	219.767	238.132
20.111	1048.88	199.163	215.63
20.202	1113.06	208.567	214.887
20.293	1005.75	216.158	195.345
20.384	1030.34	244.179	178.809
20.475	1084.83	259.417	172.147
20.566	1074.82	289.368	184.655
20.657	1060.53	308.784	187.23
20.748	1214.49	302.421	169.163
20.839	1106.72	300.799	184.713
20.93	922.745	235.206	165.359
21.021	879.734	232.579	166.715
21.112	838.997	221.894	165.524
21.203	921.701	215.325	190.752
21.294	868.843	215.593	176.945
21.385	730.826	197.656	168.364
21.476	737.805	185.017	170.721
21.567	981.97	184.673	201.312
21.658	928.245	196.94	174.201
21.749	923.877	188.617	174.547
21.84	1077.55	222.846	196.967
21.931	1139.73	248.249	194.951
22.022	1223.58	241.447	209.537
22.113	1161.28	231.738	197.447
22.204	1185.76	233.077	194.921
22.295	1114.19	207.882	200.299
22.386	1014.75	185.927	175.449
22.477	1035.86	164.779	181.593
22.568	1032.38	169.564	176.533
22.659	1282.93	161.215	211.819
22.75	1288.76	164.294	179.197
22.841	1087.87	165.645	177.938
22.932	1067.5	174.784	161.976
23.023	1056.79	166.953	158.122
23.114	1079.05	160.442	149.56
23.205	1223.63	175.019	164.574
23.296	1220.59	179.22	169.16
23.387	1355.31	204.042	171.11
23.478	1336.2	219.081	169.638
23.569	1378.6	196.46	154.57
23.66	1362.59	170.91	155.404
23.751	1346.59	165.014	163.118
23.842	1231.97	160.68	179.336
23.933	1151.25	148.393	172.532
24.024	1311.94	156.871	175.425
24.115	1477.15	158.053	203.85
24.206	1279.92	165.017	169.834
24.297	1405.8	187.55	164.452
24.388	1380.89	196.081	167.122
24.479	1408.11	208.492	177.428
24.57	1341.75	197.399	175.226
24.661	1417.32	172.217	174.96
24.752	1426.82	161.49	180.469
24.843	1434.41	154.047	195.908
24.934	1421.62	156.714	198.848
25.025	1385.44	157.658	194.385
25.116	1354.4	150.343	195.008
25.207	1353.32	150.545	193.971
25.298	1342.26	155.096	195.269
25.389	1307.66	163.48	193.979
25.48	1247.84	166.765	180.509
25.571	1211.8	157.571	164.731
25.662	1223.15	140.935	155.939
25.753	1225.25	128.783	150.595
25.844	1185.7	126.314	147.255
25.935	1142.7	122.712	152.084
26.026	1173.63	118.125	162.846
26.117	1296.43	114.886	170.305
26.208	1362.4	111.82	173.06
26.299	1321.48	114.879	163.403
26.39	1369.73	123.395	165.952
26.481	1335.35	153.145	175.564
26.572	1235.29	155.024	181.529
26.663	1384.2	130.08	152.668
26.754	1330.52	148.193	163.311
26.845	1348.77	147.788	168.221
26.936	1355.35	143.555	158.956
27.027	1499.06	144.676	158.557
27.118	1484.35	138.128	179.085
27.209	1392.98	133.813	174.079
27.3	1507.99	159.266	171.204
27.391	1541.44	145.254	159.517
27.482	1698.17	154.23	198.555
27.573	1677.67	147.414	165.036
27.664	1670.17	150.009	168.08
27.755	1924.91	148.133	186.137
27.846	1687.1	141.389	162.324
27.937	1684.67	131.008	152.722
28.028	1711.14	138.114	149.19
28.119	1988.6	136.652	175.318
28.21	1894.28	140.902	149.77
28.301	1773.01	150.559	157.065
28.392	1863.91	158.942	166.001
28.483	1621.91	161.191	164.54
28.574	1566.76	159.274	165.005
28.665	1515.76	167.457	170.608
28.756	1566.11	170.573	160.118
28.847	1670.15	157.061	185.186
28.938	1617.38	163.842	179.803
29.029	1512.43	177.145	179.146
29.12	1522.69	153.473	187.51
29.211	1684.95	151.493	179.644
29.302	1536.9	139.083	180.83
29.393	1548.74	139.97	192.356
29.484	1684.35	158.203	198.588
29.575	1681.59	158.124	216.052
29.666	1598.73	167.856	204.852
29.757	1503.39	155.216	159.9
29.848	1406.72	165.335	191.51
29.939	1367.73	160.536	203.495
30.03	1477.18	136.732	170.624
30.121	1495.22	151.29	161.125
30.212	1640.21	152.13	178.197
30.303	1697.56	162.312	182.592
30.394	1643.94	150.543	197.18
30.485	1689.16	146.811	191.629
30.576	1643.17	152.387	200.337
30.667	1686.17	159.25	207.231
30.758	1588.38	133.001	161.212
30.849	1479.29	146.266	165.304
30.94	1326.29	135.531	159.053
31.031	1212.06	121.291	158.711
31.122	1236.18	138.276	164.486
31.213	1215.43	157.891	165.854
31.304	1187.54	176.908	170.754
31.395	1226.4	168.423	174.626
31.486	1280.69	170.11	143.864
31.577	1282.4	156.949	150.301
31.668	1177.75	154.456	124.731
31.759	1327.59	146.049	149.654
31.85	1083.85	163.132	130.244
31.941	1030.66	156.774	132.811
