# Supplementary material for: De novo apical domain formation inside the Drosophila adult midgut epithelium
Source: eLife. 2022 Sep 28;11:e76366. doi: 10.7554/eLife.76366 (PMC9545526; doi:10.7554/eLife.76366)
Supplement: Figure 5—figure supplement 1—source data 1. [file elife-76366-fig5-figsupp1-data1.xlsx]

## Sheet: Sheet1
		GFP+	GFP+PAC+	GFP+full apical
0		0	0	0				GFP+total			GFP+PAC			GFP+Apical				ISC/EB	pre-EC with PAC	EC		ISC/EB	pre-EC with PAC	EC
17hr	4p4	42	0	0				A	P	total	A	P	total	A	P	total		0	0	0
							0hr	0	0	0
	4a1	34	0	0			17hr	72	245	317	0	1	1	3	0	3		98.7382	0.315457	0.946372		99.0595	0.0788644	0.861593
	4a2	38	0	3				121	419	540	0	0	0	0	0	0		100	0	0		1.19783	0.157729	1.17987
	4p1	101	1	0				60	260	320	0	0	0	8	0	8		97.5	0	2.5
	4p2	69	0	0				0	374	374	0	0	0	0	0	0		100	0	0
	4p3	33	0	0			41hr	126	366	492	2	38	40	12	61	73		77.0325	8.13008	14.8374		62.9971	12.3208	24.6821
	3a1	29	0	0				233	442	675	27	66	93	71	77	148		64.2963	13.7778	21.9259		10.4869	3.5122	7.82955
	3a2	92	0	0				105	208	313	6	45	51	55	42	97		52.7157	16.2939	30.9904
	3p1	124	0	0				170	579	749	19	64	83	57	175	232		57.9439	11.0814	30.9746
	3p2	116	0	0			65hr	178	336	514	0	2	2	55	164	219		57.0039	0.389105	42.607		49.462	1.05427	49.4837
	3p3	91	0	0				299	368	667	0	1	1	189	201	390		41.3793	0.149925	58.4708		8.35585	0.914515	8.46499
	3p4	88	0	0				108	350	458	0	8	8	42	150	192		56.3319	1.74672	41.9214
	2a1	21	0	8				152	314	466	0	9	9	107	149	256		43.133	1.93133	54.9356
	2a2	39	0	0
	2p1	101	0	0
	2p2	67	0	0
	2p3	35	0	0
	2p4	57	0	0
	1p1	147	0	0
	1p2	71	0	0
	1p3	75	0	0
	1p4	81	0	0	small cell
41hr	1p1	199	37	46	116
	1p2	72	0	0	72
	1p3	49	1	11	37
	1p4	46	0	4	42
	1a1	65	0	6	59
	1a2	61	2	6	53
	2p1	175	50	37	88
	2p2	84	13	3	68
	2p3	87	2	2	83
	2p4	96	1	35	60
	2a1	69	12	7	50
	2a2	164	15	64	85
	3p1	99	45	6	48
	3p2	34	0	0	34
	3p3	75	0	36	39
	3a1	59	6	17	36
	3a2	46	0	38	8
	4p1	159	24	37	98
	4p2	171	16	58	97
	4p3	137	9	47	81
	4p4	112	15	33	64
	4a1	60	6	14	40
	4a2	110	13	43	54
65hr	1p1	140	2	77	61
	1p2	96	0	53	43
	1p3	51	0	12	39
	1p4	49	0	22	27
	1a1	95	0	24	71
	1a2	37	0	13	24
	1a3	46	0	18	28
	2p1	170	0	99	71
	2p2	85	0	46	39
	2p3	113	1	56	56
	2a1	41	0	7	34
	2a2	170	0	126	44
	2a3	88	0	56	32
	3p1	127	2	62	63
	3p2	83	0	20	63
	3p3	140	6	68	66
	3a1	22	0	4	18
	3a2	86	0	38	48
	4p1	99	2	52	45
	4p2	124	7	52	65
	4p3	91	0	45	46
	4a1	77	0	58	19
	4a2	75	0	49	26
