# Supplementary material for: De novo apical domain formation inside the Drosophila adult midgut epithelium
Source: eLife. 2022 Sep 28;11:e76366. doi: 10.7554/eLife.76366 (PMC9545526; doi:10.7554/eLife.76366)
Supplement: Figure 5—source data 1. [file elife-76366-fig5-data1.xlsx]

## Sheet: EB no actin dome
	Area	Mean	StdDev	mode	Min	Max	Perim	IntDen	RawIntDen
1	9.005	1788.64	383.682	1932	962	2750	11.924	16106.4	1082128		2p2'	3.40753	note: 524.9079 is the average value of Sox21a nuclear intensity in ECs in the same imaging section calculated in EC subsheet
2	9.005	1788.64	383.682	1932	962	2750	11.924	16106.4	1082128			3.40753
3	17.861	2209.27	467.942	1953	1112	3584	15.527	39459.3	2651120			4.20887
4	8.305	2398.28	385.93	2498	1475	3365	10.787	19918.4	1338240			4.56895
5	8.93	1726.32	308.457	1724	948	2501	11.951	15416.7	1035793			3.28881
6	24.157	2167.13	506.699	1871	904	3403	18.152	52350.7	3517248			4.12859
7	17.98	1380.34	298.608	1346	782	2165	15.826	24818.3	1667447			2.62967
8	15.554	2151.98	431.587	1721	1179	3482	14.933	33471.4	2248816			4.09972
9	23.71	2317.29	555.187	2257	982	3707	18.155	54943.4	3691438			4.41465
From here on the measured value will be accompanied by nearby EC value, such as 1,3 is EB and 2,4 is neighbor EC
1	31.05	3062.53	558.772	1960	1642	4095	20.805	95091.6	1056573		3p1
2	32.58	1035.58	239.21	918	567	2014	21.819	33739.3	374881			2.9573
3	30.96	2704.53	523.977	1625	1373	3960	21.586	83732.2	930358
4	42.93	1134.82	348.909	911	541	2213	23.971	48717.8	541309			2.38322
5	34.02	2502.83	322.463	2281	1767	3562	21.454	85146.4	946071
6	48.06	1192.92	243.51	947	728	2309	29.116	57331.6	637018			2.09808
1	44.1	4054.67	118.234	4095	3130	4095	25.045	178811	1986787		3p2
2	66.24	674.674	216.707	422	243	1329	32.507	44690.4	496560			6.00982
3	33.03	3598.16	637.583	4095	1426	4095	26.211	118847	1320525
4	38.34	496.526	77.796	420	319	703	23.705	19036.8	211520			7.24667
5	56.16	4029.08	184.758	4095	2376	4095	27.299	226273	2514147
6	39.6	958.936	178.084	784	522	1477	23.991	37973.9	421932			4.20162
7	69.12	3921.11	283.391	4095	2500	4095	31.682	271027	3011416
8	72	859.096	164.263	766	501	1440	32.14	61854.9	687277			4.56423
9	45	2360.19	450.121	1858	1307	3582	27.027	106209	1180097
10	36.45	831.03	167.822	679	534	1315	22.922	30291	336567			2.84008
11	32.31	3306.86	445.029	3217	2083	4085	22.605	106845	1187164
12	25.83	588.467	141.075	543	330	1348	20.476	15200.1	168890			5.61946
13	29.25	1723.15	434.212	1835	901	2900	21.489	50402.2	560025
14	45.36	417.214	86.488	406	210	842	25.231	18924.8	210276			4.13014
15	28.53	1088.16	228.013	1091	600	1667	22.679	31045.2	344947
16	64.89	464.616	126.449	311	250	939	31.78	30148.9	334988			2.34207
17	21.96	1384.78	279.818	1406	830	2129	19.183	30409.7	337885
18	32.22	642.492	145.649	553	369	1257	20.705	20701.1	230012			2.15532
19	25.83	1549.14	305.06	1369	979	2574	19.009	40014.2	444602
20	54.36	594.25	144.046	490	324	1073	28.063	32303.4	358927			2.60688
1	29.91	2092.87	344.046	2034	1347	3222	21.218	62598.1	571354		3p23
2	44.92	1024.62	268.023	764	320	1692	25.296	46025.7	420092			2.04259
1	59.67	1464.2	284.683	1440	718	2457	32.862	87368.9	970766		3p3
2	44.01	656.759	86.742	696	450	933	25.44	28904	321155			2.22944
3	56.07	1799.67	353.931	1722	782	2674	29.584	100908	1121196
4	64.26	661.597	124.368	589	424	1215	30.435	42514.2	472380			2.7202
5	50.58	2073.85	338.136	1833	1018	3125	28.033	104896	1165506
6	57.24	660.371	127.44	534	364	1078	28.992	37799.6	419996			3.14044
7	67.95	2424.29	569.137	2104	1095	3935	31.721	164730	1830338
8	65.61	1035.11	308.495	906	615	3834	31.219	67913.3	754592			2.34207
1	36.031	1434.2	184.32	1529	1046	2141	24.109	51676	678376		2p22
2	50.124	486.286	93.621	509	246	761	27.611	24374.5	319976			2.94929
3	28.033	3196.78	463.944	2345	1760	4052	19.992	89614.7	1176417
4	75.338	557.203	99.141	518	349	1118	33.856	41978.6	551074			5.7372
5	34.432	2875.7	685.191	4095	1413	4095	21.811	99014.6	1299814
6	63.074	453.104	176.351	354	209	2082	33.834	28579	375170			6.34666
7	39.612	2853.01	561.511	2533	1836	4009	23.516	113012	1483567
8	57.437	468.446	139.69	412	198	968	29.493	26906	353208			6.09038
9	52.561	1885.63	410.635	1658	845	2940	28.232	99111.3	1301083
10	42.963	363.339	79.574	424	177	622	26.561	15610.2	204923			5.18972
11	43.573	2798.81	596.925	4095	1412	4095	25.478	121952	1600921
12	78.309	474.296	136.17	435	201	910	33.509	37141.6	487576			5.90098
1	16.228	1268.67	163.697	1127	856	1698	15.512	20587.9	170002		2p1
2	18.166	497.573	62.555	527	365	674	17.886	9038.72	74636			2.54972
3	22.404	1354.35	197.091	1337	835	1974	17.343	30343.1	250554
4	43.719	556.612	134.04	452	342	1565	24.556	24334.3	200937			2.4332
5	26.522	2107.73	428.67	1661	1226	3405	19.522	55900.6	461592
6	31.85	633.555	120.95	509	400	1145	24.24	20179	166625			3.32682
7	18.408	1720.84	265.575	1526	1193	2475	15.485	31676.9	261568
8	29.065	547.233	93.965	483	359	927	22.039	15905.3	131336			3.14462
9	26.643	1149.69	136.367	1036	856	1852	18.777	30631	252931
10	44.445	511.422	79.349	475	303	755	25.77	22730.3	187692			2.24802
11	23.252	2089.03	681.702	1328	850	4090	17.848	48574.1	401094
12	15.501	677.102	79.696	690	528	879	14.785	10496	86669			3.08525
13	37.663	1323.67	313.175	1133	780	2382	23.421	49853.9	411662
14	20.951	457.595	108.106	383	276	761	17.195	9587.08	79164			2.89267
15	27.854	1494.34	273.7	1289	960	2142	22.09	41623.2	343698
16	39.117	458.687	96.84	375	301	912	24.049	17942.3	148156			3.25786
1	16.693	1770.23	266.303	1421	1085	2233	15.043	29549.8	286777		1p1
2	24.009	459.223	70.249	446	288	697	20.85	11025.3	106999			3.85483
3	18.238	1561.07	179.011	1650	1159	1918	17.013	28471.2	276309
4	32.458	603.34	114.165	561	406	1266	21.666	19583.1	190052			2.58738
5	9.686	2353.54	405.638	1916	1826	3997	13.058	22796.1	221233
6	15.971	527.348	74.74	438	395	725	19.366	8422.47	81739			4.46298
7	12.571	2163.04	352.629	2199	1359	2794	14.776	27191.6	263891
8	17.311	563.137	130.523	493	329	1056	16.234	9748.4	94607			3.84106
9	19.063	1278.22	157.892	1211	901	1549	16.135	24366.1	236470
10	40.495	510.425	67.467	505	345	756	25.639	20669.7	200597			2.50422
11	29.264	1685.71	192.706	1497	1128	2076	20.699	49330	478741
12	24.009	615.871	197.268	488	383	1417	19.205	14786.2	143498			2.73711
13	19.063	1313.08	262.596	1254	935	2517	18.287	25030.6	242919
14	32.458	446.822	65.938	391	331	658	22.567	14502.9	140749			2.9387
15	19.372	1399.56	304.441	1157	684	1959	17.192	27111.9	263118
16	30.294	434.854	66.274	371	325	806	21.298	13173.5	127847			3.21847
17	19.166	1697.92	258.093	1289	1163	2239	16.579	32541.7	315813
18	23.081	273.156	48.909	253	190	502	18.194	6304.77	61187			6.21593
19	14.529	1793.7	197.936	1929	1286	2155	16.29	26060.3	252912
20	23.39	343.899	58.346	308	251	551	18.347	8043.9	78065			5.21578
21	20.505	1264.39	305.279	883	804	1912	18.068	25926.5	251613
22	23.906	273.599	39.796	252	173	378	18.666	6540.53	63475			4.62131
1	24.012	1624.02	221.807	1556	1091	2116	23.237	38996.7	393013		1a1
2	35.622	517.749	114.682	497	265	838	29.078	18443.1	185872			3.1367
3	23.616	908.29	177.338	854	556	1319	19.86	21449.8	216173
4	73.823	300.833	55.532	263	174	508	32.743	22208.5	223820			3.01925

## Sheet: aEB PAC- with actin dome
1	13.083	860.051	144.848	793	472	1319	13.247	11252.1	755985		2p2'	1.63848
2	21.344	949.625	135.944	960	633	1450	16.954	20268.5	1361762			1.80913
3	20.942	1213.1	256.548	1264	498	2125	17.211	25404.4	1706829			2.31107
4	23.963	1254.57	175.505	1130	786	1827	17.916	30063.6	2019859			2.39008
1	13.442	991.487	232.374	1258	490	1699	13.488	13327.8	1081712		2p2	2.57466	note: 385.095 is the average value of Sox21a nuclear intensity in ECs in the same imaging section calculated in EC subsheet
2	14.181	910.489	164.45	869	471	1468	13.755	12912.1	1047973			2.36432
3	28.93	1610.55	393.497	1384	668	2731	19.767	46592.8	3781577			4.18222
From here on the measured value will be accompanied by nearby EC value, such as 1,3 is EB and 2,4 is neighbor EC
1	30.42	3131.58	602.684	3612	1803	4078	20.317	95262.8	1058475		3p1
2	35.01	945.756	193.051	872	482	1520	22.111	33110.9	367899			3.3112
3	77.04	2117.8	481.028	2119	1054	3597	33.161	163155	1812837
4	48.33	1153.57	182.644	990	763	1874	25.943	55752	619467			1.83587
5	27.81	2057.07	292.54	2163	1376	2839	19.722	57207.2	635636
6	62.19	1042.16	239.566	803	512	2222	29.218	64811.7	720130			1.97386
7	64.8	3165.61	594.597	4095	1707	4095	33.725	205132	2279243
8	64.44	1122.86	246.884	975	573	1910	29.17	72357.3	803970			2.81924
9	46.98	2642.97	293.448	2542	1847	3608	25.812	124167	1379629
10	43.2	1219.26	195.594	1258	852	2070	25.838	52672.1	585245			2.16768
11	71.46	2434.52	439.669	2110	1162	3895	30.587	173971	1933008
12	61.02	1345.02	394.025	1002	673	3222	28.894	82072.8	911920			1.81003
13	50.94	2067.31	377.571	1965	1221	3164	27.128	105309	1170098
14	38.07	1082.06	216.155	869	684	1748	23.213	41194	457711			1.91053
1	35.91	1388.27	287.709	1454	775	1925	24.487	49852.7	553919		3p2
2	43.92	470.135	129.852	414	244	1027	24.982	20648.3	229426			2.95291
3	35.82	3234.82	659.743	4095	1538	4095	22.22	115871	1287458
4	37.26	472.316	96.254	372	286	729	24.96	17598.5	195539			6.84884
5	35.82	2512.06	725.159	1192	1105	4068	23.143	89982.1	999801
6	61.83	699.464	211.692	498	329	1737	30.754	43247.9	480532			3.59141
7	40.14	2148.26	421.242	1970	1301	3224	25.456	86231.3	958126
8	63.63	609.095	96.595	548	350	1036	31.548	38756.7	430630			3.52698
1	42.39	1293.93	240.128	1193	829	2007	24.081	54849.6	609440		3p22
2	32.67	701.664	153.604	747	346	1239	22.463	22923.4	254704			1.84408
1	37.799	3686.72	467.702	4095	2050	4095	24.005	139352	1271917		3p23
2	107.589	988.364	239.222	761	419	1890	40.3	106337	970573			3.73012
3	65.627	2343.97	426.865	1878	1096	3753	30.392	153828	1404039
4	50.727	1216.84	238.358	1205	574	1929	25.931	61726.3	563397			1.92628
5	46.673	1756.62	285.342	1304	1054	2553	25.636	81986.9	748322
6	70.886	1178.78	266.694	1144	409	1959	31.414	83558.9	762670			1.49021
7	73.735	3921.95	304.914	4095	2555	4095	33.122	289184	2639476
8	46.454	1090.96	217.606	944	560	1706	28.016	50679.5	462569			3.59494
9	65.298	3730.82	640.419	4095	1124	4095	31.568	243617	2223570
10	73.296	904.722	396.627	700	518	3497	31.704	66312.8	605259			4.12372
11	47.002	2382.28	455.833	2009	1339	3478	26.522	111971	1021996
12	69.243	1323.23	355.289	1082	465	2862	31.677	91624	836283			1.80034
13	74.721	2481.63	669.393	1523	1275	4046	32.081	185429	1692473
14	62.012	1275.47	308.817	956	368	2072	30.208	79094.1	721918			1.94566
15	45.687	1819.17	294.928	1393	1137	2565	29.913	83112.3	758594
16	66.613	1262.28	312.639	1049	489	2035	30.949	84084.5	767467			1.44118
1	51.57	1654.69	313.73	1770	998	2421	26.66	85332.5	948139		3p3
2	72.09	905.131	169.353	848	488	1443	33.153	65250.9	725010			1.82813
1	46.848	2444.74	545.502	2198	1250	3760	26.368	114532	1503512		2p22
2	51.038	520.028	158.931	493	261	1180	29.127	26541.2	348419			4.70116
3	61.017	1190.92	165.035	1146	762	1621	31.157	72666.4	953928
4	59.951	347.108	91.21	309	159	696	30.598	20809.3	273174			3.43098
5	31.004	2467.52	520.932	2890	1444	3729	21.711	76502.2	1004282
6	78.461	625.35	143.725	494	316	1161	33.071	49065.7	644110			3.94583
7	44.563	1337.63	193.85	1303	784	1807	25.264	59608.7	782513
8	46.315	397.245	87.319	343	238	763	26.539	18398.4	241525			3.36726
9	49.819	2428.7	470.558	2781	1313	3724	25.824	120996	1588372
10	56.446	431.623	83.274	467	250	753	29.821	24363.6	319833			5.62691
11	43.725	1046.63	183.072	977	702	1700	25.662	45763.9	600765
12	66.654	301.833	57.989	303	178	613	32.128	20118.4	264104			3.46758
13	40.069	1424.95	307.755	1475	725	2358	24.37	57095.7	749523
14	50.657	606.014	125.407	496	322	1124	28.77	30698.9	402999			2.35135
15	51.343	1832.84	419.329	1681	851	2875	27.984	94102.7	1235333
16	78.918	426.279	73.895	394	269	828	32.838	33641.2	441625			4.29962
17	52.638	1514.7	296.438	1577	890	2385	27.068	79730.3	1046659
18	53.247	645.724	113.825	587	322	1032	27.649	34382.9	451361			2.34574
1	23.373	1261.84	203.458	1016	805	1812	18.436	29493.1	243535		2p1
2	21.193	692	120.495	627	452	1120	17.637	14665.7	121100			1.82347
3	40.691	1944.66	405.698	1587	1004	2926	23.229	79130.2	653407
4	36.937	491.298	66.11	475	362	715	22.878	18147	149846			3.95822
5	31.85	1159.16	226.927	1044	692	1793	23.223	36919.5	304858
6	58.372	474.498	87.307	391	280	796	29.804	27697.5	228708			2.44291
1	29.676	1242.34	175.583	1076	684	1614	19.932	36867.6	357795		1p1
2	23.493	304.947	51.933	310	203	426	18.38	7164.23	69528			4.07397
3	22.978	1394.98	374.272	1696	701	2181	19.071	32054.1	311081
4	35.24	348.886	66.431	312	226	724	22.432	12294.7	119319			3.99839
5	17.723	988.099	169.257	874	677	1379	15.951	17512.1	169953
6	25.966	420.31	128.445	402	281	1317	19.369	10913.9	105918			2.35088
7	27.718	1415.39	368.658	1337	602	2308	20.886	39231.7	380739
8	40.598	330.558	94.539	315	192	948	25.457	13420.1	130240			4.28181
9	17.826	866.289	111.16	806	632	1125	16.287	15442.5	149868
10	44.72	427.636	112.146	354	247	815	26	19123.8	185594			2.02576
11	32.149	1343.92	313.553	1195	700	2054	25.335	43205.4	419303
12	33.9	332.739	62.817	276	201	529	23.991	11280	109471			4.03896
13	38.331	938.048	140.013	869	612	1471	23.674	35956.6	348954
14	28.233	495.277	113.494	446	262	1080	20.167	13983.3	135706			1.89399
15	26.997	945.603	201.288	1107	508	1468	20.03	25528.2	247748
16	25.657	466.61	63.489	467	331	802	20.023	11971.9	116186			2.02654
17	20.093	1346.94	146.806	1263	1024	1707	17.146	27064.1	262654
18	38.125	539.803	65.988	551	399	778	23.725	20580.1	199727			2.49525
19	27.821	1063.16	183.301	887	531	1398	23.539	29578.1	287052
20	15.147	444.429	56.184	421	346	602	16.347	6731.77	65331			2.39218
21	15.662	1942.33	200.994	1594	1445	2459	15.388	30421.2	295234
22	23.699	471.191	115.356	390	303	956	19.345	11167	108374			4.12217
23	17.105	1041.32	160.523	793	658	1413	15.523	17811.6	172859
24	16.384	536.704	142.663	406	361	996	16.471	8793.11	85336			1.94021
25	21.02	866.569	119.458	738	579	1110	17.525	18215.6	176780
26	12.777	408.5	47.34	357	333	546	13.71	5219.44	50654			2.12134
27	18.65	1471.56	213.349	1192	984	1932	16.557	27445.2	266352
28	22.154	466.591	93.115	454	312	769	23.645	10336.8	100317			3.15385
29	25.966	1216.07	178.45	1058	777	1642	20.229	31576.8	306449
30	45.029	565.737	82.871	616	335	857	26.698	25474.5	247227			2.14953
31	27.821	697.519	81.09	622	503	912	20.767	19405.7	188330
32	51.933	650.127	119.313	621	331	1090	27.995	33762.8	327664			1.0729
33	25.863	836.462	93.49	738	632	1129	18.835	21633.7	209952
34	19.99	502.732	95.737	485	357	826	16.648	10049.6	97530			1.66383
35	16.074	1062.88	117.335	953	791	1395	15.535	17085.1	165809
36	32.973	470.378	86.866	402	292	723	21.935	15509.8	150521			2.25963
37	27.203	1122.33	329.36	899	629	2261	19.897	30530.4	296294
38	23.39	572.925	163.829	469	373	1231	20.027	13400.9	130054			1.95894
1	31.157	931.134	145.888	889	547	1405	24.595	29011	292376		1a1
2	38.499	313.075	47.669	327	210	443	25.98	12053.2	121473			2.97416
3	44.949	747.386	200.391	833	335	1464	29.042	33594.2	338566
4	35.82	398.659	78.232	393	227	942	24.635	14280.1	143916			1.87475
5	43.957	835.774	277.434	536	373	2427	25.844	36737.9	370248
6	44.552	409.056	96.191	334	229	799	25.337	18224.3	183666			2.04318
7	27.684	939.896	207.638	744	535	1471	19.528	26019.9	262231
8	84.242	300.664	63.941	337	161	698	42.659	25328.6	255264			3.12607
9	40.98	756.225	139.578	652	420	1188	24.323	30990.1	312321
10	81.166	378.357	107.252	357	165	731	40.403	30709.7	309496			1.99871
11	29.271	1007.77	215.429	727	575	1539	21.837	29498.9	297293
12	70.053	399.581	82.085	353	206	933	38.115	27991.8	282104			2.52207
13	37.904	1052.91	255.915	772	546	1667	23.504	39909.5	402212
14	52.688	361.992	78.24	352	205	574	30.936	19072.8	192218			2.90866
15	33.141	1153.69	241.265	1185	645	1801	23.218	38234.5	385331
16	62.71	317.573	55.939	290	169	486	34.791	19915.1	200706			3.63282
17	26.592	917.66	142.362	771	603	1376	21.313	24402.7	245933
18	60.527	465.723	107.154	361	275	830	38.819	28188.9	284091			1.9704
19	32.05	961.037	191.077	904	564	1450	22.887	30800.9	310415
20	108.453	360.649	77.151	329	170	648	40.954	39113.4	394189			2.66474
21	34.63	913.473	178.939	781	490	1292	25.333	31633.1	318802
22	75.907	483.542	98.623	448	262	788	36.415	36704.3	369910			1.88913
23	20.936	885.659	173.866	822	576	1325	20.32	18542.6	186874
24	39.194	468.405	91.849	428	239	718	24.24	18358.6	185020			1.8908
25	64.099	1113.6	246.823	1212	523	1794	31.284	71380.9	719384
26	61.222	401.434	82.643	348	256	943	36.701	24576.5	247685			2.77405
27	58.047	708.542	163.12	614	339	1147	28.826	41128.5	414497
28	78.289	625.275	137.22	467	322	1000	39.472	48951.9	493342			1.13317
29	50.902	1176.41	274.477	833	586	1830	26.506	59882.4	603501
30	58.543	530.58	100.26	529	274	859	31.415	31061.6	313042			2.21722
31	32.347	1566.07	245.093	1327	1011	2227	21.874	50658.2	510539
32	59.833	601.96	150.286	496	303	998	34.288	36016.9	362982			2.60162
33	74.617	711.872	175.158	503	360	1194	33.283	53117.9	535328
34	72.434	478.621	70.699	449	282	982	32.442	34668.5	349393			1.48734

## Sheet: preEC PAC+
1	15.167	423.708	80.873	429	220	751	16.549	6426.29	431758		2p2'	0.807204	note: 524.9079 is the average value of Sox21a nuclear intensity in ECs in the same imaging section calculated in EC subsheet
2	20.704	812.961	144.307	801	383	1381	16.532	16831.3	1130829			1.54877
3	17.831	859.431	153.974	859	494	1423	16.085	15324.5	1029598			1.6373
1	19.541	693.067	133.721	768	320	1113	16.19	13543.3	1099205		2 p2	1.79973	note: 385.095 is the average value of Sox21a nuclear intensity in ECs in the same imaging section calculated in EC subsheet
2	15.734	454.983	85.799	401	192	721	15.018	7158.66	581013			1.18148
3	22.634	669.632	133.596	660	289	1249	17.844	15156.2	1230114			1.73887
4	18.297	576.622	107.198	522	279	1038	16.776	10550.3	856284			1.49735
From here on the measured value will be accompanied by nearby EC value, such as 1,3 is EB and 2,4 is neighbor EC
1	29.07	1557.17	244.703	1373	947	2301	20.47	45267	502967		3p1
2	46.35	1225.6	206.226	1059	694	1916	25.555	56806.7	631186			1.27054
3	29.25	1388.41	168.737	1277	1002	1946	21.743	40611	451233
4	42.66	1326.12	325.134	1227	736	3187	24.613	56572.4	628582			1.04697
5	22.32	1558.03	208.425	1460	1125	2180	18.235	34775.2	386391
6	35.28	1025.68	202.469	911	658	1946	22.836	36185.8	402065			1.51903
7	47.25	1108.68	221.266	1039	648	1709	26.537	52385.1	582057
8	60.66	1173.83	267.049	1190	642	2018	28.674	71204.7	791163			0.944496
9	33.03	849.755	121.609	699	575	1140	28.72	28067.4	311860
10	50.67	857.828	202.913	809	523	1884	28.137	43466.1	482957			0.990589
11	29.52	1374.52	190.524	1367	900	1872	22.13	40575.8	450842
12	40.14	1102.26	196.477	989	669	1789	25.823	44244.5	491606			1.247
13	31.5	1418.62	232.324	1168	919	2002	21.681	44686.5	496517
14	44.64	1000.02	135.617	996	666	1487	29.351	44640.9	496010			1.41859
15	33.57	1623.22	334.066	1422	1037	3889	21.855	54491.7	605463
16	51.21	1198.21	242.318	1093	610	1897	27.219	61360.6	681784			1.3547
17	31.05	1770.99	244.983	1743	1251	2544	20.754	54989.2	610991
18	33.3	1098.07	181.896	1094	736	1776	23.155	36565.7	406285			1.61282
19	43.38	1619.22	286.039	1444	895	2672	24.967	70241.7	780463
20	33.84	1054.36	283.277	867	492	2892	22.541	35679.4	396438			1.53574
1	36.18	795.632	143.897	748	526	1637	24.405	28786	319844		3p2
2	42.57	656.59	170.781	634	342	1503	26.933	27951	310567			1.21176
3	35.19	777.847	195.114	859	421	1457	23.108	27372.4	304138
4	41.49	443.351	83.058	372	275	860	25.134	18394.7	204385			1.75447
1	40.41	820.898	143.939	654	513	1725	23.192	33172.5	368583		3p22
2	32.94	799.101	117.246	721	540	1111	21.902	26322.4	292471			1.02728
3	39.69	808.791	140.838	732	503	1323	22.933	32100.9	356677
4	84.51	890.014	150.808	843	557	1334	34.84	75215.1	835723			0.90874
5	33.48	790.296	151.956	657	493	1325	21.514	26459.1	293990
6	49.32	572.577	110.39	515	287	911	30.105	28239.5	313772			1.38024
7	41.67	774.134	146.053	726	436	1266	23.584	32258.2	358424
8	52.56	871.51	170.522	850	472	1384	27.623	45806.6	508962			0.888267
9	41.31	773.19	118.963	798	508	1245	24.575	31940.5	354894
10	74.97	614.694	222.962	477	320	2122	35.749	46083.6	512040			1.25785
11	53.28	727.258	160.229	670	455	1468	27.568	38748.3	430537
12	33.3	761.784	139.911	667	451	1163	24.049	25367.4	281860			0.954677
1	49.522	1170.92	248.823	1061	613	2057	27.808	57985.7	529255		3p23
2	73.515	1214.51	240.046	1000	532	1863	32.413	89285.3	814937			0.964107
3	58.286	1398.37	276.899	1220	694	2237	29.114	81505.8	743931
4	65.737	1265.26	344.259	1040	539	2568	32.156	83173.6	759153			1.10521
5	72.639	1450.59	275.672	1254	842	2340	31.581	105369	961741
6	86.334	1267.85	233.154	1010	731	1955	34.871	109458	999062			1.14414
7	50.508	1523.15	319.937	1412	786	2678	27.34	76930.7	702172
8	68.257	1289.96	283.969	1008	663	2344	31.754	88048	803644			1.18077
1	51.84	594.035	97.165	594	395	1011	27.495	30794.8	342164		3p3
2	51.39	544.308	114.657	495	356	968	29.65	27972	310800			1.09136
3	51.75	675.689	124.93	600	393	1169	28.73	34966.9	388521
4	61.29	528.537	85.636	517	320	951	30.194	32394.1	359934			1.27841
5	49.86	843.224	153.218	839	480	1524	26.561	42043.1	467146
6	71.64	629.466	117.341	592	368	1114	31.194	45094.9	501055			1.33959
7	49.95	619.011	86.78	498	418	870	27.686	30919.6	343551
8	62.28	634.198	112.03	517	382	1023	30.819	39497.8	438865			0.976053
9	46.98	610.851	76.092	545	440	884	34.02	28697.8	318864
10	90.09	697.724	131.789	579	387	1129	37.507	62858	698422			0.875491
11	46.08	862.957	124.154	776	612	1328	25.093	39765.1	441834
12	63.99	911.551	200.14	1009	506	1532	31.354	58330.2	648113			0.946691
13	52.29	1000.97	161.818	871	573	1408	32.118	52340.8	581565
14	52.38	643.794	101.012	658	436	986	29.216	33721.9	374688			1.5548
1	46.544	370.532	46.742	381	256	519	26.632	17245.9	226395		2p22
2	52.257	554.332	100.885	462	280	1172	29.524	28967.6	380272			0.66843
3	48.905	653.997	107.289	662	399	1034	25.938	31983.7	419866
4	56.066	658.87	104.979	653	442	1168	32.24	36939.9	484928			0.992604
5	29.175	582.585	97.95	534	351	927	22.453	16997.2	223130
6	58.579	518.726	97.472	444	335	849	30.586	30386.6	398900			1.12311
7	32.07	842.998	114.051	810	578	1185	23.18	27035	354902
8	55.38	712.094	145.766	569	386	1135	32.628	39435.7	517692			1.18383
9	71.301	924.735	157.207	837	554	1528	30.659	65934.3	865552
10	43.039	573.214	96.017	500	365	858	26.541	24670.8	323866			1.61325
11	43.42	712.953	123.335	742	444	1011	25.499	30956.6	406383
12	41.897	524.625	82.76	519	323	772	25.513	21980.1	288544			1.35898
13	48.753	523.15	93.906	459	251	914	29.658	25504.9	334816
14	55.532	651.014	140.548	509	378	1143	30.084	36152.3	474589			0.803593
15	29.023	790.714	116.434	798	512	1194	21.713	22948.9	301262
16	57.97	659.307	145.672	688	305	1015	30.378	38220	501733			1.19931
17	40.526	971.812	161.288	906	551	1487	24.877	39383.3	517004
18	39.688	717.94	133.242	663	416	1326	24.021	28493.4	374047			1.35361
19	54.923	724.953	133.417	625	409	1247	28.937	39816.5	522691
20	71.986	624.433	141.928	544	359	1149	33.543	44950.6	590089			1.16098
21	53.399	688.496	124.025	639	439	1191	26.836	36765.3	482636
22	56.827	710.724	212.441	662	431	2650	27.925	40388.5	530200			0.968725
23	35.269	618.222	131.242	554	376	1025	23.532	21804.4	286237
24	63.988	554.627	146.943	512	304	1105	29.806	35489.4	465887			1.11466
25	30.623	825.664	144.949	963	498	1290	22.44	25284.1	331917
26	50.352	581.195	134.748	554	314	980	25.929	29264.5	384170			1.42063
27	40.297	822.446	228.988	713	491	2807	25.069	33142.2	435074
28	55.761	672.078	137.72	599	423	1196	27.686	37475.6	491961			1.22374
1	31.366	695.212	168.804	497	373	1473	21.374	21806	180060		2p1
2	68.545	355.74	92.658	296	189	771	33.321	24384.2	201349			1.95427
3	40.933	564.621	113.674	519	325	971	24.85	23111.7	190842
4	32.698	585.433	117.82	534	373	1213	22.664	19142.5	158067			0.96445
5	33.182	675.201	180.693	518	338	1592	22.826	22404.8	185005
6	19.498	570.311	121.42	592	321	986	17.042	11119.8	91820			1.18392
7	26.885	537.243	85.702	482	360	766	20.891	14443.8	119268
8	41.296	492.223	66.532	395	320	693	25.427	20327.1	167848			1.09146
9	39.48	1058.16	153.954	919	641	1523	23.065	41776.2	344961
10	21.193	473.32	76.486	445	310	691	18.54	10031.2	82831			2.23562
11	35.12	564.838	149.018	506	349	1549	24.07	19837.2	163803
12	25.19	477.553	87.302	424	292	773	21.343	12029.4	99331			1.18278
13	31.608	475.471	69.332	482	289	709	22.976	15028.8	124098
14	37.906	556.543	110.464	486	354	905	23.431	21096.1	174198			0.854329
15	17.802	828.51	76.48	757	649	1006	15.501	14749.4	121791
16	35.605	535.133	80.145	499	372	829	24.914	19053.2	157329			1.54823
17	38.027	681.924	170.782	520	374	1440	23.207	25931.3	214124
18	51.469	505.565	118.349	368	322	852	28.456	26021	214865			1.34884
19	46.504	725.797	121.039	756	431	1298	28.236	33752.4	278706
20	45.535	611.795	124.393	474	315	1123	25.31	27858.2	230035			1.18634
21	39.48	670.819	101.773	609	386	1112	23.042	26483.9	218687
22	47.231	640.769	100.205	583	456	1094	27.146	30263.9	249900			1.0469
23	31.971	850.879	173.876	753	518	1498	22.54	27203.8	224632
24	30.276	636.788	102.008	549	397	1013	22.602	19279.4	159197			1.3362
1	13.498	601.901	77.939	603	461	953	15.373	8124.68	78849		1p1'
2	21.329	465.435	57.616	501	345	642	17.855	9927.49	96345			1.2932
3	19.372	614.915	128.477	449	440	1166	17.456	11912	115604
4	32.767	510.409	80.733	488	354	794	22.024	16724.6	162310			1.20475
5	28.027	602.923	107.618	481	393	965	20.259	16898.2	163995
6	23.906	588.379	135.44	585	360	1071	21.629	14065.5	136504			1.02472
7	12.88	730.704	93.318	711	484	918	13.604	9411.56	91338
8	19.681	477.209	95.511	472	249	788	17.798	9391.88	91147			1.5312
9	25.657	629.337	151.957	692	429	1379	19.079	16147	156705
10	15.456	606.06	129.494	490	392	1138	15.848	9367.35	90909			1.03841
11	23.184	573.058	169.94	386	353	1309	19.086	13285.9	128938
12	31.118	455.944	84.742	386	281	692	22.715	14188.2	137695			1.25686
13	32.046	679.942	268.151	647	357	2243	21.495	21789.3	211462
14	46.471	507.723	124.955	412	274	1273	25.192	23594.6	228983			1.3392
15	21.226	676.888	137	584	488	1250	18.554	14367.9	139439
16	38.64	572.213	108.976	482	358	898	25.102	22110.5	214580			1.18293
17	19.681	795.277	103.184	668	503	972	16.791	15651.7	151898
18	27.306	525.611	67.618	471	362	730	19.818	14352.3	139287			1.51305
19	15.353	653.906	59.568	655	506	825	15.626	10039.5	97432
20	20.917	477.823	58.15	418	370	642	18.139	9994.77	96998			1.36851
21	32.87	659.386	78.937	614	518	983	22.352	21674.1	210344
22	19.99	640.557	143.247	506	420	1379	17.533	12804.7	124268			1.02939
23	14.529	742.816	97.272	697	499	938	16.408	10792.2	104737
24	24.833	525.004	137.265	459	302	1107	18.744	13037.4	126526			1.41488
25	32.561	846.804	167.55	790	559	1512	22.47	27572.7	267590
26	30.397	415.176	59.187	393	293	611	21.866	12620.2	122477			2.03963
27	23.906	832.647	90.062	745	631	1113	18.384	19904.8	193174
28	21.845	519.16	84.404	485	357	826	19.396	11340.9	110062			1.60384
29	29.573	654.972	91.765	559	442	986	21.304	19369.3	187977
30	24.936	462.074	71.566	444	323	800	21.337	11522.3	111822			1.41746
31	25.245	730.531	122.176	682	546	1295	24.501	18442.3	178980
32	36.064	648.511	109.811	610	433	1076	23.987	23388.1	226979			1.12647
33	14.426	578.029	64.448	544	437	733	17.163	8338.49	80924
34	12.468	646.975	170.546	694	431	1144	14.589	8066.46	78284			0.893433
35	16.59	608.087	113.006	673	348	863	17.402	10087.9	97902
36	37.404	496.807	76.98	437	318	821	23.663	18582.5	180341			1.22399
37	26.378	576.062	142.446	464	386	1379	20.526	15195.7	147472
38	33.385	507.321	78.616	509	340	709	21.7	16937.1	164372			1.1355
39	29.47	947.245	193.275	992	584	1457	20.523	27915	270912
40	46.265	504.806	91.968	473	326	970	26.217	23355.1	226658			1.87645
41	39.671	728.826	115.565	777	471	1056	24.336	28913.1	280598
42	46.678	544.876	137.249	518	326	1088	25.75	25433.5	246829			1.3376
43	26.894	669.513	124.736	633	435	975	20.36	18005.7	174743
44	35.343	486.583	116.509	381	267	900	22.925	17197.3	166898			1.37595
45	24.112	540.816	74.746	565	380	769	18.543	13039.9	126551
46	36.683	501.07	102.365	460	314	865	23.665	18380.6	178381			1.07932
47	15.662	631.322	119.383	508	457	1016	15.88	9887.92	95961
48	20.917	493.778	85.319	398	327	754	16.863	10328.5	100237			1.27855
49	17.311	496.976	94.833	432	345	931	21.919	8603.1	83492
50	31.737	388.091	83.835	320	233	685	21.553	12316.7	119532			1.28057
51	33.9	692.687	162.612	614	426	1147	25.037	23482.4	227894
52	39.671	477.558	114.301	423	250	968	25.25	18945.1	183860			1.45048
53	14.735	498.427	75.307	440	344	729	15.225	7344.25	71275
54	18.857	461.35	70.613	437	337	760	16.822	8699.44	84427			1.08037
55	26.069	823.174	187.083	662	506	1304	21.269	21459.6	208263
56	28.955	423.096	44.919	405	297	547	21.323	12250.5	118890			1.9456
57	26.585	731.19	93.955	651	533	1067	22.708	19438.4	188647
58	32.973	443.669	82.804	374	285	723	24.505	14629.1	141974			1.64805
59	24.421	708.819	238.484	558	397	1405	18.649	17309.9	167990
60	27.821	421.089	82.867	387	274	725	21.039	11715.1	113694			1.6833
61	39.98	395.982	79.36	313	231	613	26.78	15831.3	153641
62	35.858	354.966	59.995	309	234	520	23.25	12728.4	123528			1.11555
1	51.696	619.273	111.394	575	322	954	28.442	32014.1	322641		1a1
2	46.834	450.131	89.477	454	236	794	31.76	21081.5	212462			1.37576
3	40.583	551.166	111.387	461	348	866	26.897	22368	225427
4	60.031	500.412	92.224	395	283	815	34.134	30040.3	302749			1.10142
5	50.307	571.88	116.837	500	338	1045	28.372	28769.6	289943
6	26.592	452.646	80.665	465	300	755	21.887	12036.9	121309			1.26342

## Sheet: EC
1	29.634	511.587	90.179	463	279	963	21.086	15160.4	1018569		2p2'
2	20.912	414.48	81.95	365	182	687	17.932	8667.62	582345
3	30.021	423.117	116.07	371	192	919	20.787	12702.4	853427
4	29.426	739.773	145.386	602	409	1455	19.806	21768.3	1462531
5	20.689	474.776	100.23	462	244	982	16.554	9822.52	659938
6	27.074	586.294	114.234	512	256	1062	20.611	15873.3	1066469
7	20.272	586.05	127.69	619	296	1984	17.57	11880.4	798200
8	23.16	446.976	121.307	419	190	1154	19.01	10351.7	695495
9	25.154	638.171	119.451	640	346	1247	18.772	16052.5	1078509
10	18.531	427.855	107.734	348	151	763	16.915	7928.39	532679
		524.908
1	19.196	360.547	72.724	360	181	624	17.579	6921.11	561733		2p2
2	21.057	354.302	64.605	360	194	568	16.741	7460.39	605502
3	25.147	431.123	113.12	356	180	977	19.254	10841.5	879923
4	19.714	372.918	100.15	370	176	1145	16.74	7351.56	596669
5	20.404	406.585	90.353	359	215	795	17.102	8295.78	673304
		385.095
