# Supplementary material for: De novo apical domain formation inside the Drosophila adult midgut epithelium
Source: eLife. 2022 Sep 28;11:e76366. doi: 10.7554/eLife.76366 (PMC9545526; doi:10.7554/eLife.76366)
Supplement: Figure 8—figure supplement 2—source data 1. [file elife-76366-fig8-figsupp2-data1.xlsx]

## Sheet: wt
0	3.33094		length of the line using to measure the cno intensity (um)
0.454545	6.04042		30.14
0.909091	6.17406		32.743
1.36364	8.24958		28.907
1.81818	9.62416		23.427
2.27273	11.4226		38.497
2.72727	12.2717		40.588
3.18182	9.09016		35.584
3.63636	12.0256		29.319
4.09091	14.911		26.1
4.54545	13.0173		40.194
5	12.9442		40.546
5.45455	15.3101		43.89
5.90909	11.3102		53.086
6.36364	10.4458
6.81818	9.03243
7.27273	12.5502
7.72727	20.2316
8.18182	23.3697
8.63636	20.7932
9.09091	20.5101
9.54545	18.5791
10	18.0341
10.4545	16.6538
10.9091	15.1572
11.3636	19.5365
11.8182	19.5428
12.2727	20.2272
12.7273	18.4918
13.1818	21.0555
13.6364	21.1932
14.0909	20.5905
14.5455	19.2475
15	27.0929
15.4545	27.0026
15.9091	33.3001
16.3636	22.6626
16.8182	20.0304
17.2727	20.1682
17.7273	17.0706
18.1818	21.7766
18.6364	15.2648
19.0909	20.7806
19.5455	19.8206
20	18.0462
20.4545	17.184
20.9091	14.3025
21.3636	12.426
21.8182	13.6343
22.2727	19.6898
22.7273	23.2562
23.1818	24.2728
23.6364	29.081
24.0909	32.7208
24.5455	29.1881
25	27.3869
25.4545	29.0683
25.9091	29.2192
26.3636	23.7865
26.8182	19.8915
27.2727	20.3483
27.7273	16.9416
28.1818	18.9331
28.6364	28.3351
29.0909	25.1016
29.5455	26.2691
30	36.079
30.4545	35.0198
30.9091	32.2345
31.3636	34.8761
31.8182	37.8109
32.2727	45.1925
32.7273	51.7738
33.1818	61.4182
33.6364	55.7491
34.0909	61.8727
34.5455	71.9118
35	63.8794
35.4545	59.0084
35.9091	55.4607
36.3636	49.6375
36.8182	46.4757
37.2727	52.3971
37.7273	49.3668
38.1818	47.3566
38.6364	62.4474
39.0909	61.9368
39.5455	65.208
40	60.7407
40.4545	65.9238
40.9091	64.8085
41.3636	62.3138
41.8182	69.4863
42.2727	57.2645
42.7273	56.2868
43.1818	54.163
43.6364	51.0321
44.0909	48.8061
44.5455	48.2024
45	50.0091
45.4545	53.0548
45.9091	50.3457
46.3636	48.2304
46.8182	46.2623
47.2727	46.786
47.7273	58.8205
48.1818	55.4132
48.6364	57.5327
49.0909	60.5099
49.5455	61.7907
50	62.8158
50.4545	60.2381
50.9091	59.2386
51.3636	57.4982
51.8182	52.0579
52.2727	48.2966
52.7273	39.5694
53.1818	38.8177
53.6364	36.3859
54.0909	29.5656
54.5455	23.7048
55	20.1734
55.4545	20.6788
55.9091	21.6186
56.3636	16.3372
56.8182	12.6163
57.2727	12.7329
57.7273	12.5238
58.1818	10.4133
58.6364	9.74866
59.0909	8.37937
59.5455	6.42105
60	7.13403
60.4545	8.70424
60.9091	10.0588
61.3636	10.9793
61.8182	12.3892
62.2727	14.5309
62.7273	14.9889
63.1818	12.4499
63.6364	9.41987
64.0909	8.02272
64.5455	9.04388
65	10.6146
65.4545	7.0578
65.9091	10.4962
66.3636	11.5806
66.8182	6.47592
67.2727	9.29805
67.7273	8.60571
68.1818	7.88724
68.6364	8.94133
69.0909	8.55089
69.5455	9.11974
70	9.92786
70.4545	11.2749
70.9091	10.889
71.3636	8.82112
71.8182	7.52157
72.2727	8.96666
72.7273	6.70616
73.1818	6.18171
73.6364	8.29822
74.0909	11.233
74.5455	9.51359
75	15.1406
75.4545	12.9583
75.9091	14.9326
76.3636	15.3414
76.8182	14.43
77.2727	13.6095
77.7273	12.8162
78.1818	12.0319
78.6364	9.69936
79.0909	9.59565
79.5455	6.18674
80	7.4422
80.4545	6.35992
80.9091	5.95802
81.3636	6.68465
81.8182	7.47858
82.2727	6.74915
82.7273	6.94638
83.1818	8.29058
83.6364	8.24229
84.0909	8.02845
84.5455	9.25764
85	10.4209
85.4545	14.6712
85.9091	13.9758
86.3636	13.2026
86.8182	13.6237
87.2727	13.0456
87.7273	11.9462
88.1818	10.9875
88.6364	13.0365
89.0909	15.6672
89.5455	19.7253
90	20.6126
90.4545	25.2379
90.9091	25.0746
91.3636	25.4849
91.8182	24.0047
92.2727	25.3042
92.7273	22.2757
93.1818	20.0732
93.6364	20.7294
94.0909	21.1319
94.5455	22.9129
95	22.2796
95.4545	23.1629
95.9091	18.5296
96.3636	14.0015
96.8182	25.1219
97.2727	18.6098
97.7273	18.0394
98.1818	16.0219
98.6364	17.4538
99.0909	19.3448
99.5455	17.5935
100	16.0837
0	5.90669
0.41841	8.0194
0.83682	9.93257
1.25523	5.93755
1.67364	5.21038
2.09205	6.82804
2.51046	6.30381
2.92887	7.71784
3.34728	7.28396
3.76569	4.15848
4.1841	4.22904
4.60251	4.64189
5.02092	5.59065
5.43933	6.03637
5.85774	6.40581
6.27615	8.18959
6.69456	6.20423
7.11297	6.2835
7.53138	7.14985
7.94979	9.17617
8.3682	9.14977
8.78661	8.62139
9.20502	8.16052
9.62343	7.71076
10.0418	11.1301
10.4603	12.0093
10.8787	8.80645
11.2971	10.9155
11.7155	11.2328
12.1339	12.0688
12.5523	11.4119
12.9707	6.69254
13.3891	7.75767
13.8075	9.25691
14.2259	8.61916
14.6444	7.97586
15.0628	6.01916
15.4812	7.57866
15.8996	6.89595
16.318	4.36542
16.7364	3.96488
17.1548	2.93052
17.5732	3.31477
17.9916	4.75336
18.41	3.84913
18.8285	4.25518
19.2469	3.81647
19.6653	5.89979
20.0837	2.40451
20.5021	2.67272
20.9205	2.04288
21.3389	2.21305
21.7573	2.76419
22.1757	2.03419
22.5941	1.95251
23.0126	1.87981
23.431	3.71533
23.8494	3.12139
24.2678	1.82379
24.6862	0.862491
25.1046	2.22847
25.523	2.27645
25.9414	1.35563
26.3598	1.54046
26.7782	1.7795
27.1967	2.24373
27.6151	2.52528
28.0335	1.40649
28.4519	2.96866
28.8703	2.52836
29.2887	2.64401
29.7071	3.66886
30.1255	3.01933
30.5439	1.60719
30.9623	1.33801
31.3808	1.71326
31.7992	3.35158
32.2176	3.06005
32.636	3.53173
33.0544	3.96767
33.4728	5.37875
33.8912	4.77475
34.3096	5.47275
34.728	8.24231
35.1464	7.86891
35.5649	9.8219
35.9833	8.19464
36.4017	12.0929
36.8201	11.3654
37.2385	13.4601
37.6569	14.6613
38.0753	12.0743
38.4937	12.4746
38.9121	14.4473
39.3305	20.9189
39.749	35.7544
40.1674	30.9683
40.5858	40.1075
41.0042	50.8457
41.4226	58.8585
41.841	69.481
42.2594	74.5658
42.6778	77.1752
43.0962	76.6335
43.5146	78.1844
43.9331	74.4942
44.3515	71.3288
44.7699	74.4692
45.1883	73.7352
45.6067	69.9128
46.0251	100
46.4435	68.6664
46.8619	77.7055
47.2803	68.2135
47.6987	74.5523
48.1172	73.1909
48.5356	72.0711
48.954	69.3231
49.3724	62.722
49.7908	59.8754
50.2092	54.3295
50.6276	50.7203
51.046	53.4303
51.4644	61.1075
51.8828	67.1245
52.3013	67.2163
52.7197	65.5139
53.1381	60.3124
53.5565	63.545
53.9749	61.1029
54.3933	56.4841
54.8117	58.9739
55.2301	55.5587
55.6485	57.3497
56.0669	61.2302
56.4854	66.0795
56.9038	55.4148
57.3222	46.6945
57.7406	40.3132
58.159	36.0833
58.5774	38.2748
58.9958	36.4194
59.4142	30.8806
59.8326	32.7332
60.251	29.336
60.6695	26.9723
61.0879	21.433
61.5063	15.1884
61.9247	16.778
62.3431	13.2316
62.7615	10.36
63.1799	10.3055
63.5983	8.99132
64.0167	8.54507
64.4351	9.16592
64.8536	9.11715
65.272	8.86778
65.6904	11.0968
66.1088	9.68575
66.5272	5.70175
66.9456	7.03452
67.364	6.98597
67.7824	6.34237
68.2008	3.99422
68.6192	2.43184
69.0377	3.30282
69.4561	2.21026
69.8745	2.35328
70.2929	2.97675
70.7113	3.10564
71.1297	2.20813
71.5481	2.84304
71.9665	2.99365
72.3849	2.76248
72.8033	3.76363
73.2218	3.5164
73.6402	4.07194
74.0586	2.41676
74.477	4.20714
74.8954	4.24787
75.3138	2.21031
75.7322	1.26674
76.1506	0.277774
76.569	1.93995
76.9874	1.71028
77.4059	1.60775
77.8243	1.12645
78.2427	4.31037
78.6611	1.89058
79.0795	2.31804
79.4979	4.27763
79.9163	3.11147
80.3347	2.50813
80.7531	2.8611
81.1715	3.03931
81.59	2.96154
82.0084	3.15175
82.4268	5.51327
82.8452	6.57367
83.2636	5.67375
83.682	4.26467
84.1004	2.49709
84.5188	1.94887
84.9372	2.75926
85.3556	5.03372
85.7741	6.45904
86.1925	4.93741
86.6109	3.74835
87.0293	2.96411
87.4477	2.50417
87.8661	3.9993
88.2845	4.65979
88.7029	4.55162
89.1213	5.30525
89.5397	6.41767
89.9582	7.05864
90.3766	7.1057
90.795	5.93495
91.2134	6.57901
91.6318	6.04324
92.0502	5.64272
92.4686	4.01485
92.887	4.38122
93.3054	3.45579
93.7238	6.17458
94.1423	4.13539
94.5607	4.07992
94.9791	2.7685
95.3975	5.41447
95.8159	6.42451
96.2343	6.11464
96.6527	6.08284
97.0711	5.91375
97.4895	5.01386
97.9079	1.49662
98.3264	0
98.7448	1.96264
99.1632	6.56102
99.5816	8.1463
100	3.22781
0	5.15623
0.473934	4.8545
0.947867	7.49971
1.4218	10.1402
1.89573	14.9137
2.36967	12.3911
2.8436	13.6626
3.31754	16.3828
3.79147	18.0351
4.2654	16.7077
4.73934	13.5644
5.21327	13.5015
5.6872	13.3905
6.16114	11.276
6.63507	12.1655
7.109	8.85194
7.58294	7.92584
8.05687	6.77309
8.53081	5.50705
9.00474	5.9246
9.47867	5.10102
9.95261	4.80602
10.4265	6.5464
10.9005	6.79531
11.3744	6.71802
11.8483	6.44756
12.3223	6.42809
12.7962	6.54983
13.2701	5.72206
13.7441	5.93284
14.218	6.3409
14.6919	5.50228
15.1659	5.69298
15.6398	6.11873
16.1137	5.66009
16.5877	5.56373
17.0616	5.47985
17.5355	6.96216
18.0095	3.74859
18.4834	4.50807
18.9573	4.1613
19.4313	4.74214
19.9052	5.26159
20.3791	5.07377
20.8531	5.35351
21.327	6.12494
21.8009	7.02739
22.2749	4.5969
22.7488	4.37165
23.2227	4.94849
23.6967	4.11244
24.1706	4.4945
24.6445	3.37985
25.1185	5.42401
25.5924	4.06858
26.0664	5.16533
26.5403	5.14796
27.0142	6.33066
27.4882	5.84626
27.9621	6.3839
28.436	6.24349
28.91	5.20565
29.3839	3.75568
29.8578	2.84011
30.3318	3.11906
30.8057	4.91855
31.2796	4.91425
31.7536	5.9144
32.2275	8.00923
32.7014	8.12512
33.1754	7.49913
33.6493	8.23068
34.1232	10.3409
34.5972	9.91225
35.0711	10.8199
35.545	12.7784
36.019	12.7912
36.4929	12.0034
36.9668	13.9206
37.4408	14.3993
37.9147	13.5974
38.3886	15.6071
38.8626	14.2133
39.3365	19.9806
39.8104	22.3301
40.2844	23.0231
40.7583	29.5324
41.2322	36.6381
41.7062	38.3022
42.1801	40.1262
42.654	59.3027
43.128	55.4377
43.6019	70.6411
44.0758	74.3578
44.5498	64.3841
45.0237	67.9222
45.4976	63.4062
45.9716	60.2201
46.4455	54.5044
46.9194	43.4249
47.3934	40.0503
47.8673	37.5742
48.3412	39.5288
48.8152	50.807
49.2891	59.8174
49.763	60.4546
50.237	63.1549
50.7109	64.8731
51.1848	65.7616
51.6588	67.7967
52.1327	67.3625
52.6066	69.0376
53.0806	68.2796
53.5545	63.5914
54.0284	66.2413
54.5024	62.334
54.9763	61.2836
55.4502	58.3488
55.9242	52.9671
56.3981	49.9447
56.872	43.6132
57.346	46.8506
57.8199	36.5395
58.2938	27.0413
58.7678	25.0496
59.2417	24.184
59.7156	15.549
60.1896	13.8726
60.6635	12.1288
61.1374	11.1912
61.6114	12.779
62.0853	12.6458
62.5592	15.3195
63.0332	11.5657
63.5071	12.7822
63.981	9.59144
64.455	11.2592
64.9289	9.88782
65.4028	13.938
65.8768	13.7629
66.3507	10.082
66.8246	8.68983
67.2986	10.7024
67.7725	8.31927
68.2464	7.00872
68.7204	7.0082
69.1943	7.05215
69.6682	6.55595
70.1422	5.67934
70.6161	6.37689
71.09	5.44263
71.564	5.49771
72.0379	4.50673
72.5118	6.42287
72.9858	6.11088
73.4597	6.92341
73.9336	5.99368
74.4076	7.38503
74.8815	7.33753
75.3555	6.84588
75.8294	7.89275
76.3033	7.12034
76.7773	5.1101
77.2512	4.73196
77.7251	4.77456
78.1991	4.1715
78.673	4.72996
79.1469	5.08739
79.6209	5.60327
80.0948	7.73732
80.5687	5.63644
81.0427	4.25072
81.5166	2.51306
81.9905	4.22147
82.4645	3.83572
82.9384	4.38974
83.4123	5.52976
83.8863	6.81439
84.3602	6.01253
84.8341	3.35407
85.3081	3.86887
85.782	5.66648
86.2559	5.0689
86.7299	4.402
87.2038	4.03014
87.6777	6.05881
88.1517	8.23097
88.6256	11.1025
89.0995	9.14465
89.5735	5.57781
90.0474	5.41817
90.5213	4.56854
90.9953	4.81577
91.4692	7.44933
91.9431	6.74183
92.4171	5.74904
92.891	6.06078
93.3649	5.62117
93.8389	6.1399
94.3128	9.11738
94.7867	10.8441
95.2607	10.8833
95.7346	11.4419
96.2085	15.184
96.6825	16.5577
97.1564	15.5389
97.6303	13.0964
98.1043	10.9947
98.5782	9.32924
99.0521	6.06176
99.5261	4.61309
100	5.02316
0	6.44297
0.584795	7.72151
1.16959	8.08237
1.75439	8.18496
2.33918	5.65461
2.92398	5.863
3.50877	6.47658
4.09357	5.33905
4.67836	4.40826
5.26316	4.62033
5.84795	5.01672
6.43275	5.76986
7.01754	6.3936
7.60234	5.04023
8.18713	4.66864
8.77193	5.16699
9.35673	3.57469
9.94152	6.33552
10.5263	5.15661
11.1111	4.58298
11.6959	3.14659
12.2807	3.00173
12.8655	2.23421
13.4503	3.52565
14.0351	3.55833
14.6199	2.96641
15.2047	3.15968
15.7895	3.59152
16.3743	2.86593
16.9591	4.91757
17.5439	4.38405
18.1287	3.25841
18.7135	2.59009
19.2982	3.47664
19.883	2.81126
20.4678	1.63612
21.0526	1.05782
21.6374	2.39387
22.2222	2.45709
22.807	3.17069
23.3918	2.68361
23.9766	2.24565
24.5614	4.0275
25.1462	4.75077
25.731	7.35632
26.3158	3.81897
26.9006	3.51866
27.4854	3.51703
28.0702	2.83438
28.655	2.00058
29.2398	2.68884
29.8246	3.46484
30.4094	2.62644
30.9942	0.682164
31.5789	0.505673
32.1637	0.376753
32.7485	0.907908
33.3333	1.32547
33.9181	3.18831
34.5029	2.33206
35.0877	3.04956
35.6725	3.33026
36.2573	4.22286
36.8421	4.21681
37.4269	3.6781
38.0117	3.73151
38.5965	2.90705
39.1813	2.67574
39.7661	3.39554
40.3509	6.32015
40.9357	7.64515
41.5205	5.90995
42.1053	7.16031
42.6901	11.0083
43.2749	15.0969
43.8596	16.8035
44.4444	18.5498
45.0292	21.2941
45.614	23.743
46.1988	27.6776
46.7836	29.144
47.3684	34.2449
47.9532	43.6954
48.538	49.5564
49.1228	53.5322
49.7076	57.1129
50.2924	57.3033
50.8772	62.9534
51.462	64.797
52.0468	66.0488
52.6316	70.1751
53.2164	74.5832
53.8012	73.2916
54.386	67.3877
54.9708	66.795
55.5556	69.9944
56.1404	70.009
56.7251	72.3187
57.3099	66.6759
57.8947	68.3163
58.4795	72.1183
59.0643	80.8354
59.6491	61.1075
60.2339	60.6263
60.8187	50.4683
61.4035	47.0895
61.9883	38.7174
62.5731	35.6233
63.1579	31.3435
63.7427	22.3988
64.3275	23.1017
64.9123	21.4793
65.4971	17.9591
66.0819	17.0345
66.6667	12.8837
67.2515	9.97441
67.8363	6.1329
68.4211	7.07972
69.0058	8.13008
69.5906	6.08307
70.1754	4.99575
70.7602	6.09481
71.345	4.85041
71.9298	5.09583
72.5146	4.49623
73.0994	2.96013
73.6842	2.70635
74.269	2.28715
74.8538	1.09056
75.4386	2.2552
76.0234	1.46598
76.6082	2.38882
77.193	2.21659
77.7778	1.76866
78.3626	2.49029
78.9474	1.78162
79.5322	1.28936
80.117	1.56589
80.7018	1.08629
81.2865	1.0122
81.8713	0.838163
82.4561	1.48431
83.0409	0.307096
83.6257	1.35485
84.2105	1.50344
84.7953	1.83403
85.3801	1.40296
85.9649	1.85342
86.5497	0.577596
87.1345	1.23027
87.7193	1.3552
88.3041	2.96433
88.8889	3.22684
89.4737	3.5628
90.0585	3.84213
90.6433	2.91039
91.2281	3.28311
91.8129	3.38221
92.3977	2.95219
92.9825	2.97258
93.5673	4.36207
94.152	5.24938
94.7368	7.91514
95.3216	8.48604
95.9064	7.92774
96.4912	7.72828
97.076	8.72014
97.6608	8.5711
98.2456	8.32916
98.8304	9.29195
99.4152	11.5992
100	3.13243
0	10.3588
0.355872	9.47848
0.711744	10.4213
1.06762	11.1725
1.42349	9.56106
1.77936	7.98067
2.13523	9.50368
2.4911	9.04683
2.84698	10.4613
3.20285	7.54609
3.55872	4.76015
3.91459	4.36001
4.27046	6.65608
4.62633	8.52173
4.98221	9.73267
5.33808	10.5557
5.69395	6.12379
6.04982	5.88033
6.40569	7.60716
6.76157	9.17904
7.11744	6.43455
7.47331	7.50279
7.82918	10.3997
8.18505	7.19582
8.54093	6.76946
8.8968	5.10271
9.25267	4.71575
9.60854	10.1396
9.96441	12.0556
10.3203	12.9455
10.6762	9.35394
11.032	8.87592
11.3879	7.14317
11.7438	5.9548
12.0996	5.36914
12.4555	5.22691
12.8114	5.82808
13.1673	6.98469
13.5231	6.72874
13.879	5.46915
14.2349	6.36266
14.5907	6.03027
14.9466	6.54992
15.3025	9.20295
15.6584	7.8037
16.0142	5.26645
16.3701	5.92015
16.726	5.90676
17.0819	4.80617
17.4377	10.8082
17.7936	9.60169
18.1495	12.8245
18.5053	13.1083
18.8612	11.0193
19.2171	8.67231
19.573	8.39289
19.9288	8.48436
20.2847	6.56698
20.6406	12.2756
20.9964	16.845
21.3523	12.0555
21.7082	7.03133
22.0641	6.4456
22.4199	7.09693
22.7758	6.37186
23.1317	8.64304
23.4875	10.6509
23.8434	10.8354
24.1993	13.2098
24.5552	14.8921
24.911	15.0446
25.2669	15.678
25.6228	14.613
25.9786	13.0857
26.3345	13.9018
26.6904	15.1664
27.0463	15.371
27.4021	15.0441
27.758	14.4375
28.1139	13.2546
28.4698	12.0189
28.8256	11.1038
29.1815	11.0492
29.5374	9.69256
29.8932	14.3363
30.2491	13.9825
30.605	11.9547
30.9609	11.6636
31.3167	13.9091
31.6726	15.664
32.0285	13.6336
32.3843	11.0778
32.7402	10.7541
33.0961	10.1694
33.452	11.3893
33.8078	12.2016
34.1637	12.5469
34.5196	12.8706
34.8754	12.855
35.2313	14.4398
35.5872	14.981
35.9431	15.8801
36.2989	18.7211
36.6548	15.2425
37.0107	19.2357
37.3665	28.3332
37.7224	30.9665
38.0783	32.8927
38.4342	32.3964
38.79	27.8628
39.1459	23.0602
39.5018	17.033
39.8577	17.4661
40.2135	18.0818
40.5694	20.5497
40.9253	20.8846
41.2811	17.9625
41.637	16.3252
41.9929	16.6752
42.3488	17.8565
42.7046	21.2744
43.0605	19.7697
43.4164	18.4724
43.7722	18.2637
44.1281	21.353
44.484	22.4618
44.8399	22.2949
45.1957	23.8012
45.5516	26.7052
45.9075	41.8301
46.2633	34.4359
46.6192	51.5928
46.9751	37.3027
47.331	57.3502
47.6868	55.1009
48.0427	56.5584
48.3986	52.4998
48.7544	55.5995
49.1103	66.2525
49.4662	55.8104
49.8221	53.5455
50.1779	54.618
50.5338	53.8932
50.8897	54.8119
51.2456	45.3449
51.6014	46.4665
51.9573	46.601
52.3132	46.9979
52.669	58.3038
53.0249	55.7495
53.3808	68.2295
53.7367	64.3407
54.0925	73.9011
54.4484	65.4394
54.8043	73.2811
55.1601	89.857
55.516	74.4557
55.8719	72.1889
56.2278	72.5741
56.5836	71.8959
56.9395	73.2597
57.2954	50.9574
57.6512	61.7907
58.0071	56.8073
58.363	58.3093
58.7189	56.216
59.0747	58.1329
59.4306	51.9855
59.7865	46.6323
60.1423	40.3267
60.4982	37.6117
60.8541	37.8287
61.21	39.3577
61.5658	34.5109
61.9217	23.7761
62.2776	24.2451
62.6335	32.5249
62.9893	31.8052
63.3452	27.3597
63.7011	26.1335
64.0569	29.4262
64.4128	29.9801
64.7687	26.4841
65.1246	28.5994
65.4804	28.6138
65.8363	27.0947
66.1922	24.611
66.548	26.102
66.9039	23.6375
67.2598	24.1557
67.6157	25.651
67.9715	24.0946
68.3274	27.9684
68.6833	30.6064
69.0391	25.7104
69.395	27.2238
69.7509	23.2422
70.1068	23.5051
70.4626	27.7374
70.8185	24.2715
71.1744	25.4714
71.5302	16.8877
71.8861	13.2789
72.242	10.2115
72.5979	10.6088
72.9537	9.2539
73.3096	9.80572
73.6655	9.99208
74.0214	7.9008
74.3772	6.88376
74.7331	7.76066
75.089	5.77644
75.4448	6.43193
75.8007	6.95802
76.1566	7.54174
76.5125	6.33428
76.8683	6.15722
77.2242	6.15473
77.5801	5.64171
77.9359	5.5803
78.2918	6.52168
78.6477	8.60177
79.0036	8.51479
79.3594	8.92587
79.7153	8.41832
80.0712	8.01559
80.427	7.26566
80.7829	5.00517
81.1388	4.76588
81.4947	4.17041
81.8505	4.90301
82.2064	6.96956
82.5623	9.18871
82.9181	9.10469
83.274	9.34022
83.6299	8.07764
83.9858	7.8758
84.3416	8.70609
84.6975	6.97305
85.0534	6.90314
85.4093	7.60474
85.7651	9.34435
86.121	6.08087
86.4769	7.28943
86.8327	6.98961
87.1886	6.30428
87.5445	5.37529
87.9004	5.95655
88.2562	7.94709
88.6121	7.57643
88.968	4.59832
89.3238	5.9464
89.6797	5.65793
90.0356	2.98398
90.3915	3.6718
90.7473	7.15595
91.1032	5.91313
91.4591	5.43229
91.8149	3.84202
92.1708	4.85564
92.5267	4.8674
92.8826	5.1552
93.2384	6.87168
93.5943	7.40231
93.9502	7.96652
94.306	8.13833
94.6619	6.07376
95.0178	5.11076
95.3737	7.98277
95.7295	5.91762
96.0854	6.49681
96.4413	7.01019
96.7972	7.87967
97.153	7.00695
97.5089	4.60652
97.8648	5.56063
98.2206	5.15867
98.5765	6.24465
98.9324	6.29863
99.2883	3.91593
99.6441	2.63066
100	5.35711
0	12.7921
0.390625	14.4051
0.78125	17.6814
1.17187	18.7017
1.5625	22.6515
1.95312	29.0746
2.34375	33.5013
2.73437	28.7276
3.125	26.301
3.51562	21.2829
3.90625	24.6009
4.29687	23.0418
4.6875	26.1493
5.07812	25.029
5.46875	22.8093
5.85937	20.7327
6.25	18.2805
6.64062	16.5196
7.03125	18.989
7.42188	20.2385
7.8125	20.2648
8.20312	14.6321
8.59375	17.3129
8.98437	19.799
9.375	19.5424
9.76562	17.7489
10.1562	17.5928
10.5469	16.1999
10.9375	18.6822
11.3281	17.2883
11.7187	17.417
12.1094	17.4505
12.5	16.9589
12.8906	20.0694
13.2812	19.8107
13.6719	21.2353
14.0625	24.6962
14.4531	30.6306
14.8438	28.091
15.2344	26.3665
15.625	25.4736
16.0156	26.2835
16.4062	29.0062
16.7969	27.137
17.1875	27.1546
17.5781	29.5532
17.9687	24.7622
18.3594	22.9273
18.75	18.9924
19.1406	23.7301
19.5312	26.8779
19.9219	24.2184
20.3125	22.0096
20.7031	22.7649
21.0938	19.7202
21.4844	22.0311
21.875	19.0394
22.2656	16.3698
22.6562	16.8253
23.0469	21.5054
23.4375	43.7978
23.8281	47.3298
24.2188	81.2339
24.6094	93.016
25	55.2048
25.3906	34.8553
25.7812	22.0518
26.1719	27.5581
26.5625	20.8811
26.9531	22.7609
27.3437	17.515
27.7344	13.089
28.125	16.4328
28.5156	14.5882
28.9062	14.936
29.2969	14.7948
29.6875	17.7028
30.0781	18.8733
30.4688	13.727
30.8594	13.2921
31.25	14.1847
31.6406	16.203
32.0312	14.5094
32.4219	20.1581
32.8125	19.2816
33.2031	18.9087
33.5938	15.1291
33.9844	19.1624
34.375	18.4761
34.7656	16.6468
35.1562	18.3438
35.5469	17.4357
35.9375	15.8718
36.3281	16.3792
36.7188	15.1193
37.1094	15.1672
37.5	15.1581
37.8906	14.7823
38.2812	15.9666
38.6719	18.5641
39.0625	16.6409
39.4531	14.3012
39.8438	18.0634
40.2344	20.1429
40.625	20.305
41.0156	24.5159
41.4062	25.9945
41.7969	26.8084
42.1875	28.5396
42.5781	27.7966
42.9687	27.6818
43.3594	25.6234
43.75	23.7974
44.1406	23.5749
44.5312	25.9615
44.9219	27.5596
45.3125	34.6852
45.7031	40.719
46.0938	37.0425
46.4844	37.4006
46.875	34.474
47.2656	35.461
47.6562	31.98
48.0469	33.4842
48.4375	35.0469
48.8281	39.1266
49.2187	43.0152
49.6094	49.2809
50	47.3097
50.3906	52.5848
50.7812	62.1201
51.1719	58.6121
51.5625	63.3879
51.9531	59.7558
52.3438	64.5759
52.7344	65.7158
53.125	75.7252
53.5156	75.3321
53.9062	70.5128
54.2969	77.14
54.6875	94.9555
55.0781	96.5274
55.4687	100
55.8594	85.264
56.25	74.9315
56.6406	65.7887
57.0312	48.6464
57.4219	51.5363
57.8125	41.0208
58.2031	36.1699
58.5937	35.2789
58.9844	34.7207
59.375	37.0841
59.7656	34.0196
60.1562	35.3141
60.5469	33.6715
60.9375	30.7849
61.3281	30.7058
61.7187	37.4008
62.1094	31.9865
62.5	33.7229
62.8906	45.0435
63.2812	34.3613
63.6719	31.968
64.0625	31.3443
64.4531	33.3827
64.8438	30.5769
65.2344	29.0115
65.625	29.4764
66.0156	25.2091
66.4062	27.6176
66.7969	29.105
67.1875	35.4109
67.5781	40.2333
67.9687	35.9001
68.3594	34.0443
68.75	32.787
69.1406	23.824
69.5312	19.1319
69.9219	15.3929
70.3125	22.2336
70.7031	23.6254
71.0937	24.9221
71.4844	20.2082
71.875	18.6452
72.2656	14.697
72.6562	13.12
73.0469	13.0586
73.4375	14.0057
73.8281	13.1403
74.2188	15.2986
74.6094	16.5079
75	13.9077
75.3906	11.7069
75.7812	10.5016
76.1719	14.3853
76.5625	19.9137
76.9531	25.3246
77.3437	30.4909
77.7344	27.8971
78.125	21.508
78.5156	16.9314
78.9062	18.092
79.2969	15.3604
79.6875	12.3727
80.0781	12.9296
80.4688	12.9857
80.8594	11.234
81.25	8.69545
81.6406	10.3603
82.0312	10.775
82.4219	9.4253
82.8125	8.48025
83.2031	11.575
83.5937	12.5987
83.9844	12.4943
84.375	12.7554
84.7656	11.5729
85.1562	13.2946
85.5469	15.5086
85.9375	14.8482
86.3281	13.9404
86.7188	11.7473
87.1094	10.9921
87.5	10.5708
87.8906	10.7116
88.2812	13.6611
88.6719	9.8108
89.0625	10.8515
89.4531	11.7944
89.8437	13.0132
90.2344	12.4786
90.625	11.0679
91.0156	9.75665
91.4062	11.9614
91.7969	12.6112
92.1875	12.0151
92.5781	11.2069
92.9688	19.8465
93.3594	23.4735
93.75	26.8259
94.1406	22.3595
94.5312	30.4622
94.9219	27.8905
95.3125	30.304
95.7031	24.0973
96.0938	28.5254
96.4844	29.5678
96.875	22.2445
97.2656	20.3856
97.6562	13.8702
98.0469	7.94235
98.4375	5.97507
98.8281	3.08739
99.2187	1.39544
99.6094	0
100	0.571488
0	12.8013
0.342466	13.5166
0.684932	16.6
1.0274	12.6412
1.36986	19.5398
1.71233	16.7463
2.05479	14.0187
2.39726	18.9308
2.73973	18.3488
3.08219	21.5781
3.42466	22.8084
3.76712	18.7624
4.10959	16.9543
4.45205	17.3558
4.79452	19.0994
5.13699	16.4496
5.47945	16.911
5.82192	13.8061
6.16438	10.4648
6.50685	11.8889
6.84932	14.6485
7.19178	17.8283
7.53425	17.9676
7.87671	15.6933
8.21918	14.0512
8.56164	16.5178
8.90411	14.198
9.24658	16.3623
9.58904	12.7917
9.93151	14.3488
10.274	18.393
10.6164	18.7864
10.9589	15.5068
11.3014	13.4536
11.6438	11.6621
11.9863	9.54009
12.3288	7.34991
12.6712	8.01469
13.0137	8.71211
13.3562	8.52113
13.6986	11.3404
14.0411	11.9618
14.3836	11.4317
14.726	9.83598
15.0685	9.38148
15.411	11.5576
15.7534	13.6931
16.0959	16.2575
16.4384	12.7763
16.7808	15.5666
17.1233	13.7828
17.4658	15.2946
17.8082	14.1547
18.1507	20.2562
18.4932	18.9135
18.8356	17.1112
19.1781	21.0536
19.5205	15.697
19.863	15.1319
20.2055	19.1171
20.5479	14.5688
20.8904	9.61338
21.2329	10.2116
21.5753	9.63595
21.9178	10.086
22.2603	11.8399
22.6027	14.2966
22.9452	15.9963
23.2877	17.3135
23.6301	14.777
23.9726	11.1122
24.3151	7.68392
24.6575	9.46123
25	9.59931
25.3425	9.84525
25.6849	11.6186
26.0274	10.5372
26.3699	13.0366
26.7123	15.1842
27.0548	15.5291
27.3973	19.9776
27.7397	26.1907
28.0822	30.2694
28.4247	32.6336
28.7671	35.2789
29.1096	31.4007
29.4521	29.8961
29.7945	34.1257
30.137	40.057
30.4795	33.8703
30.8219	37.9043
31.1644	43.1074
31.5068	40.2486
31.8493	41.5279
32.1918	42.4835
32.5342	34.3103
32.8767	33.4981
33.2192	30.9742
33.5616	39.9317
33.9041	27.6272
34.2466	28.911
34.589	33.4206
34.9315	28.5146
35.274	24.888
35.6164	27.8848
35.9589	33.4654
36.3014	36.215
36.6438	44.6459
36.9863	45.283
37.3288	46.9666
37.6712	48.2439
38.0137	44.1348
38.3562	44.1451
38.6986	37.1422
39.0411	39.3999
39.3836	33.0275
39.726	28.037
40.0685	26.5433
40.411	29.1595
40.7534	34.3677
41.0959	32.276
41.4384	37.4223
41.7808	45.5728
42.1233	47.135
42.4658	44.9216
42.8082	43.6161
43.1507	41.7246
43.4932	40.4561
43.8356	39.576
44.1781	38.3169
44.5205	35.2451
44.863	42.3704
45.2055	38.0734
45.5479	31.7723
45.8904	32.6805
46.2329	34.8937
46.5753	33.993
46.9178	33.4305
47.2603	30.4993
47.6027	29.0207
47.9452	33.4578
48.2877	33.4441
48.6301	32.1498
48.9726	31.9037
49.3151	28.8795
49.6575	29.6104
50	32.5316
50.3425	33.4509
50.6849	34.3954
51.0274	32.2143
51.3699	32.8501
51.7123	28.4234
52.0548	30.7952
52.3973	31.5159
52.7397	28.0334
53.0822	32.0823
53.4247	26.8253
53.7671	24.1672
54.1096	23.4919
54.4521	24.1827
54.7945	22.2386
55.137	23.7197
55.4795	22.5638
55.8219	23.4912
56.1644	17.6293
56.5068	15.1988
56.8493	14.7153
57.1918	13.5375
57.5342	15.72
57.8767	17.1799
58.2192	17.6416
58.5616	13.3608
58.9041	19.4766
59.2466	27.0758
59.589	30.2456
59.9315	32.8169
60.274	25.2781
60.6164	20.8746
60.9589	19.6597
61.3014	17.8739
61.6438	21.2165
61.9863	25.373
62.3288	22.5386
62.6712	24.7244
63.0137	23.8735
63.3562	28.2428
63.6986	28.5071
64.0411	25.9224
64.3836	24.9715
64.726	32.0997
65.0685	24.2497
65.411	27.5881
65.7534	22.7485
66.0959	28.0601
66.4384	33.8688
66.7808	38.5746
67.1233	39.2455
67.4658	37.8178
67.8082	36.2324
68.1507	37.3032
68.4932	35.5605
68.8356	35.2657
69.1781	38.0375
69.5205	38.8752
69.863	38.396
70.2055	36.3651
70.5479	33.4618
70.8904	33.5283
71.2329	40.6125
71.5753	49.7095
71.9178	50.9855
72.2603	48.0522
72.6027	43.885
72.9452	48.928
73.2877	49.8171
73.6301	54.7203
73.9726	61.1086
74.3151	62.3635
74.6575	58.6451
75	52.5582
75.3425	58.4669
75.6849	47.8486
76.0274	46.0647
76.3699	47.8315
76.7123	66.4044
77.0548	51.8055
77.3973	58.185
77.7397	62.7869
78.0822	73.7795
78.4247	60.2053
78.7671	64.3357
79.1096	62.1938
79.4521	57.2433
79.7945	61.0485
80.137	58.5033
80.4795	59.6198
80.8219	61.4479
81.1644	52.6937
81.5068	50.976
81.8493	55.597
82.1918	53.7086
82.5342	49.8543
82.8767	49.4946
83.2192	53.6046
83.5616	62.6927
83.9041	68.0912
84.2466	64.6605
84.589	65.2137
84.9315	58.9026
85.274	53.9027
85.6164	43.7578
85.9589	45.0434
86.3014	49.9223
86.6438	49.5476
86.9863	39.9855
87.3288	33.2659
87.6712	28.7696
88.0137	27.0085
88.3562	28.6797
88.6986	31.2442
89.0411	24.4087
89.3836	25.0216
89.726	26.047
90.0685	29.9243
90.411	30.8445
90.7534	26.1741
91.0959	22.5317
91.4384	17.5537
91.7808	15.9143
92.1233	17.1515
92.4658	14.7904
92.8082	18.0581
93.1507	19.4859
93.4932	19.1145
93.8356	19.3922
94.1781	21.9444
94.5205	24.2521
94.863	27.1975
95.2055	25.2153
95.5479	25.4475
95.8904	34.5032
96.2329	37.9122
96.5753	31.5156
96.9178	35.3683
97.2603	32.2285
97.6027	31.6304
97.9452	29.2089
98.2877	27.8
98.6301	23.1972
98.9726	21.408
99.3151	15.7953
99.6575	11.5028
100	6.4966
0	7.95109
0.296736	6.49969
0.593472	3.68763
0.890208	3.15034
1.18694	2.79008
1.48368	2.79448
1.78042	4.35167
2.07715	4.96585
2.37389	6.82806
2.67062	8.49204
2.96736	9.84114
3.26409	9.18508
3.56083	6.91933
3.85757	7.6122
4.1543	4.51147
4.45104	2.9695
4.74777	2.80705
5.04451	1.76884
5.34125	1.64579
5.63798	1.91022
5.93472	2.07799
6.23145	2.23581
6.52819	2.18374
6.82493	2.41306
7.12166	2.31275
7.4184	2.49828
7.71513	1.7439
8.01187	2.54319
8.30861	1.67493
8.60534	1.48879
8.90208	1.34448
9.19881	1.25115
9.49555	2.61188
9.79228	2.8676
10.089	3.38585
10.3858	3.27536
10.6825	3.50052
10.9792	3.35009
11.276	3.78227
11.5727	2.33144
11.8694	1.93766
12.1662	1.76774
12.4629	2.79466
12.7596	2.519
13.0564	2.61727
13.3531	2.45723
13.6499	2.83136
13.9466	2.06572
14.2433	2.3965
14.5401	1.08556
14.8368	1.1639
15.1335	0.861095
15.4303	1.93377
15.727	1.55561
16.0237	2.18849
16.3205	1.54549
16.6172	1.69099
16.9139	2.20915
17.2107	2.33261
17.5074	2.89812
17.8042	4.1808
18.1009	4.8844
18.3976	5.12728
18.6944	5.05717
18.9911	4.1727
19.2878	2.81235
19.5846	2.96721
19.8813	3.94707
20.178	4.08168
20.4748	4.42353
20.7715	4.68428
21.0682	4.95944
21.365	5.79021
21.6617	6.69094
21.9585	6.18457
22.2552	6.94814
22.5519	6.55458
22.8487	4.4618
23.1454	7.0279
23.4421	5.83399
23.7389	6.43233
24.0356	6.40682
24.3323	6.5945
24.6291	7.32281
24.9258	7.1253
25.2226	7.65821
25.5193	7.10586
25.816	7.06984
26.1128	7.76588
26.4095	7.95151
26.7062	6.9312
27.003	7.64595
27.2997	6.3778
27.5964	7.69669
27.8932	8.2635
28.1899	8.8005
28.4866	8.55449
28.7834	9.15534
29.0801	9.53538
29.3769	9.22276
29.6736	11.4649
29.9703	10.0866
30.2671	10.6595
30.5638	10.165
30.8605	9.5197
31.1573	10.7355
31.454	11.6986
31.7507	11.1778
32.0475	12.154
32.3442	13.1566
32.6409	13.2607
32.9377	12.1454
33.2344	14.9964
33.5312	12.5936
33.8279	13.6689
34.1246	13.2153
34.4214	13.3007
34.7181	13.8155
35.0148	14.4466
35.3116	14.3397
35.6083	14.6687
35.905	15.1719
36.2018	16.0811
36.4985	16.5522
36.7953	20.1476
37.092	21.7009
37.3887	25.4059
37.6855	23.856
37.9822	31.9778
38.2789	35.5805
38.5757	35.1187
38.8724	38.9386
39.1691	45.5635
39.4659	54.6857
39.7626	57.1941
40.0593	61.8862
40.3561	60.3798
40.6528	64.1882
40.9496	59.5611
41.2463	58.8885
41.543	61.461
41.8398	61.0623
42.1365	61.0551
42.4332	53.411
42.73	62.3619
43.0267	63.4646
43.3234	62.7878
43.6202	66.5657
43.9169	66.6645
44.2136	69.5212
44.5104	78.348
44.8071	82.9339
45.1039	70.1131
45.4006	71.552
45.6973	72.8091
45.9941	74.7021
46.2908	76.5117
46.5875	78.8733
46.8843	85.2791
47.181	88.2626
47.4777	80.6019
47.7745	84.6981
48.0712	90.0338
48.368	78.1863
48.6647	84.787
48.9614	95.3422
49.2582	80.9021
49.5549	84.2399
49.8516	86.5214
50.1484	82.8911
50.4451	79.4392
50.7418	94.1936
51.0386	80.3154
51.3353	78.78
51.632	82.5659
51.9288	85.8476
52.2255	85.5053
52.5223	83.253
52.819	84.2629
53.1157	86.9064
53.4125	85.7223
53.7092	76.6803
54.0059	85.3688
54.3027	100
54.5994	88.6513
54.8961	88.6629
55.1929	88.6079
55.4896	97.298
55.7864	84.4162
56.0831	91.9326
56.3798	92.9815
56.6766	91.9599
56.9733	86.6802
57.27	82.4086
57.5668	86.8783
57.8635	91.2544
58.1602	87.9659
58.457	69.1409
58.7537	66.9461
59.0504	70.3113
59.3472	59.5071
59.6439	56.2698
59.9407	56.8456
60.2374	55.0141
60.5341	35.5166
60.8309	44.0205
61.1276	32.7925
61.4243	36.4759
61.7211	37.2649
62.0178	30.1828
62.3145	35.0165
62.6113	26.0227
62.908	30.5528
63.2047	23.1902
63.5015	24.8794
63.7982	19.3234
64.095	23.6025
64.3917	7.82481
64.6884	19.3894
64.9852	7.66098
65.2819	15.2521
65.5786	15.1127
65.8754	7.05934
66.1721	5.83627
66.4688	7.88204
66.7656	8.33007
67.0623	8.84144
67.3591	8.51989
67.6558	7.52455
67.9525	7.40391
68.2493	7.73554
68.546	6.82145
68.8427	7.27796
69.1395	7.27345
69.4362	5.77362
69.7329	4.91113
70.0297	4.58553
70.3264	4.95662
70.6231	4.80767
70.9199	5.557
71.2166	4.6892
71.5134	5.03951
71.8101	5.98122
72.1068	5.21487
72.4036	5.10759
72.7003	7.75466
72.997	3.70899
73.2938	3.82529
73.5905	4.12943
73.8872	4.67516
74.184	4.29334
74.4807	4.58113
74.7774	3.65478
75.0742	3.95733
75.3709	4.41821
75.6677	4.93051
75.9644	5.04016
76.2611	5.60437
76.5579	5.5273
76.8546	6.45147
77.1513	5.79782
77.4481	6.31773
77.7448	6.78958
78.0415	7.21985
78.3383	7.13251
78.635	5.32943
78.9318	4.37129
79.2285	3.59149
79.5252	3.76278
79.822	3.2919
80.1187	4.56071
80.4154	3.06518
80.7122	2.41389
81.0089	3.41526
81.3056	4.32104
81.6024	4.59845
81.8991	3.46513
82.1958	4.8586
82.4926	4.68477
82.7893	5.06106
83.0861	6.06937
83.3828	6.24979
83.6795	5.55148
83.9763	5.33343
84.273	5.4051
84.5697	6.48769
84.8665	8.27663
85.1632	7.84271
85.4599	6.07885
85.7567	5.38825
86.0534	5.65006
86.3501	6.3816
86.6469	6.7137
86.9436	6.30986
87.2404	5.4958
87.5371	4.77639
87.8338	4.16804
88.1306	3.44155
88.4273	3.1489
88.724	2.88206
89.0208	2.74656
89.3175	3.33875
89.6142	4.0169
89.911	4.88644
90.2077	5.59092
90.5045	6.26088
90.8012	7.23606
91.0979	7.70009
91.3947	7.4136
91.6914	6.69908
91.9881	6.05983
92.2849	5.50008
92.5816	6.41495
92.8783	9.67434
93.1751	13.1899
93.4718	14.7187
93.7685	13.3667
94.0653	11.1581
94.362	11.0422
94.6588	11.9411
94.9555	11.23
95.2522	8.81974
95.549	7.12052
[truncated: 1,440 more rows]

## Sheet: mutant
0	4.2804		length of the line using to measure the cno intensity
0.37594	4.64672		37.264
0.75188	4.41336		36.442
1.12782	5.19822		35.346
1.50376	5.81648		21.92
1.8797	6.78403		24.523
2.25564	6.12751		25.345
2.63158	7.37909		78.257
3.00752	9.63206		77.84
3.38346	9.79507		71.585
3.7594	9.85945		35.322
4.13534	11.0301		41.934
4.51128	12.0392		46.607
4.88722	14.2623		45.353
5.26316	16.2362		57.475
5.6391	17.4115
6.01504	18.0594
6.39098	19.2957
6.76692	20.5835
7.14286	22.8503
7.5188	18.9751
7.89474	22.5284
8.27068	21.8778
8.64662	25.9272
9.02256	23.1973
9.3985	23.6138
9.77444	25.0186
10.1504	20.8942
10.5263	19.9863
10.9023	22.6762
11.2782	25.2813
11.6541	19.8914
12.0301	18.335
12.406	18.9542
12.782	19.6754
13.1579	21.7024
13.5338	22.6231
13.9098	21.3914
14.2857	21.6895
14.6617	20.9888
15.0376	20.7496
15.4135	22.6166
15.7895	21.1521
16.1654	20.2346
16.5414	20.1057
16.9173	17.1129
17.2932	18.0543
17.6692	16.1881
18.0451	15.7854
18.4211	17.2946
18.797	16.3608
19.1729	14.9596
19.5489	14.1109
19.9248	14.5663
20.3008	13.7593
20.6767	13.3581
21.0526	13.6887
21.4286	14.9645
21.8045	14.3667
22.1805	13.8834
22.5564	13.9056
22.9323	13.9754
23.3083	13.9498
23.6842	14.4437
24.0602	15.4603
24.4361	13.4887
24.812	13.7813
25.188	11.3434
25.5639	13.1147
25.9398	11.0236
26.3158	10.9548
26.6917	13.196
27.0677	13.8972
27.4436	15.5157
27.8195	17.0981
28.1955	18.8031
28.5714	16.3066
28.9474	16.041
29.3233	16.0999
29.6992	17.1067
30.0752	16.9945
30.4511	16.3502
30.8271	16.9857
31.203	19.4451
31.5789	19.7103
31.9549	21.8008
32.3308	21.9533
32.7068	23.6051
33.0827	19.3045
33.4586	19.7789
33.8346	22.402
34.2105	21.2263
34.5865	20.9287
34.9624	22.2222
35.3383	21.7568
35.7143	23.0035
36.0902	21.9806
36.4662	20.2434
36.8421	22.3688
37.218	22.7789
37.594	23.0238
37.9699	23.8271
38.3459	24.2047
38.7218	25.553
39.0977	25.1814
39.4737	27.8706
39.8496	26.5487
40.2256	28.0432
40.6015	27.9309
40.9774	24.2161
41.3534	21.6219
41.7293	19.734
42.1053	18.4544
42.4812	20.8328
42.8571	18.8886
43.2331	19.2877
43.609	16.719
43.985	18.2122
44.3609	16.3629
44.7368	16.6489
45.1128	17.8808
45.4887	16.6929
45.8647	17.9203
46.2406	18.4943
46.6165	18.2837
46.9925	17.3339
47.3684	14.2391
47.7444	15.6319
48.1203	15.995
48.4962	16.1758
48.8722	15.5796
49.2481	16.2102
49.6241	14.2298
50	16.4806
50.3759	17.5262
50.7519	15.6113
51.1278	17.5954
51.5038	18.4116
51.8797	16.9737
52.2556	17.8669
52.6316	19.1005
53.0075	19.0752
53.3835	18.5615
53.7594	16.4844
54.1353	12.5861
54.5113	11.681
54.8872	15.659
55.2632	12.1149
55.6391	12.9089
56.015	12.3448
56.391	12.9112
56.7669	13.6397
57.1429	13.571
57.5188	12.3715
57.8947	14.6823
58.2707	17.0899
58.6466	13.9846
59.0226	15.1259
59.3985	13.842
59.7744	12.8236
60.1504	12.3489
60.5263	11.7382
60.9023	11.319
61.2782	10.6085
61.6541	10.2728
62.0301	9.38067
62.406	7.88185
62.782	7.76418
63.1579	7.58047
63.5338	6.82306
63.9098	7.96054
64.2857	7.43897
64.6617	6.54605
65.0376	8.19294
65.4135	7.28925
65.7895	6.58728
66.1654	6.34296
66.5414	8.17787
66.9173	7.09841
67.2932	8.31081
67.6692	8.6761
68.0451	9.87364
68.4211	10.814
68.797	9.43305
69.1729	12.9573
69.5489	11.8531
69.9248	12.7855
70.3008	13.1509
70.6767	12.5686
71.0526	11.4325
71.4286	12.3737
71.8045	12.5233
72.1805	15.2503
72.5564	14.682
72.9323	16.6857
73.3083	18.6985
73.6842	20.0723
74.0602	19.9624
74.4361	21.0138
74.812	20.1864
75.188	16.8445
75.5639	15.9305
75.9398	15.852
76.3158	16.0679
76.6917	17.4033
77.0677	16.768
77.4436	18.353
77.8195	17.3979
78.1955	14.6628
78.5714	14.3385
78.9474	13.6344
79.3233	11.9735
79.6992	10.3665
80.0752	9.79166
80.4511	11.129
80.8271	16.2343
81.203	13.2921
81.5789	13.6681
81.9549	15.383
82.3308	16.6669
82.7068	17.7443
83.0827	18.4197
83.4586	13.5566
83.8346	14.8217
84.2105	15.1549
84.5865	14.8912
84.9624	14.2541
85.3383	15.1658
85.7143	15.8031
86.0902	13.5149
86.4662	13.0915
86.8421	12.0841
87.218	11.7138
87.594	12.2292
87.9699	11.2464
88.3459	8.36025
88.7218	11.6003
89.0977	9.33074
89.4737	9.45648
89.8496	9.19232
90.2256	10.3513
90.6015	11.4674
90.9774	8.26949
91.3534	8.82554
91.7293	7.01263
92.1053	8.75408
92.4812	9.67269
92.8571	9.69905
93.2331	9.44795
93.609	8.27501
93.985	7.40928
94.3609	6.15113
94.7368	6.23415
95.1128	6.90338
95.4887	7.16469
95.8647	8.52409
96.2406	7.64053
96.6165	7.5378
96.9925	7.82248
97.3684	9.37008
97.7444	8.48691
98.1203	8.57537
98.4962	6.7761
98.8722	6.04385
99.2481	5.69867
99.6241	3.92182
100	3.52059
0	3.26267
0.625	1.31112
1.25	1.4518
1.875	2.27065
2.5	1.94287
3.125	1.9779
3.75	3.55195
4.375	4.12193
5	6.29747
5.625	8.01774
6.25	8.41243
6.875	8.0689
7.5	8.21325
8.125	7.06594
8.75	6.25394
9.375	6.72535
10	6.34797
10.625	7.03454
11.25	6.53489
11.875	6.51049
12.5	5.73322
13.125	4.17435
13.75	5.04887
14.375	4.67343
15	7.02852
15.625	4.90739
16.25	6.42334
16.875	5.12317
17.5	5.65553
18.125	5.97498
18.75	5.80363
19.375	8.10787
20	7.74155
20.625	6.75198
21.25	6.19418
21.875	6.8524
22.5	8.36331
23.125	8.15894
23.75	8.87066
24.375	10.2347
25	10.4116
25.625	11.7408
26.25	8.8762
26.875	9.46128
27.5	10.373
28.125	10.7938
28.75	9.59443
29.375	10.0078
30	7.99698
30.625	9.35449
31.25	8.41246
31.875	10.1471
32.5	11.1763
33.125	7.3775
33.75	7.51743
34.375	8.09248
35	7.91428
35.625	7.6938
36.25	9.0782
36.875	6.92499
37.5	6.84459
38.125	6.82433
38.75	6.07308
39.375	6.34346
40	5.81091
40.625	5.41999
41.25	5.81834
41.875	6.83962
42.5	6.687
43.125	7.04886
43.75	6.34723
44.375	7.21631
45	6.76198
45.625	6.32548
46.25	8.1474
46.875	8.68008
47.5	7.75316
48.125	8.87536
48.75	9.75814
49.375	9.68092
50	11.3128
50.625	11.1934
51.25	10.6405
51.875	11.3815
52.5	14.5114
53.125	16.0452
53.75	16.712
54.375	16.0795
55	14.7441
55.625	15.8112
56.25	16.6212
56.875	17.9114
57.5	13.6528
58.125	12.8497
58.75	9.98608
59.375	10.3147
60	9.30564
60.625	7.5574
61.25	6.44737
61.875	5.92844
62.5	6.05815
63.125	5.65287
63.75	6.43682
64.375	7.70317
65	8.31475
65.625	8.44165
66.25	5.96095
66.875	5.92658
67.5	8.22812
68.125	7.24398
68.75	5.38392
69.375	4.86997
70	4.20186
70.625	4.54749
71.25	3.70133
71.875	4.20399
72.5	4.17619
73.125	3.47849
73.75	3.52621
74.375	5.76145
75	5.8916
75.625	6.38139
76.25	6.33942
76.875	4.49348
77.5	6.08436
78.125	5.16915
78.75	4.87946
79.375	5.47131
80	6.45642
80.625	5.3378
81.25	5.58777
81.875	5.90141
82.5	4.64324
83.125	4.50702
83.75	4.92099
84.375	4.99873
85	4.58923
85.625	3.97348
86.25	3.96454
86.875	4.54786
87.5	4.12973
88.125	3.27423
88.75	3.92096
89.375	4.59879
90	4.64207
90.625	4.31995
91.25	5.18844
91.875	6.57225
92.5	6.75017
93.125	6.62564
93.75	6.6127
94.375	7.62007
95	6.20611
95.625	5.26295
96.25	5.03684
96.875	5.29251
97.5	5.5301
98.125	4.24711
98.75	3.88776
99.375	3.65889
100	3.69416
0	1.9707
0.387597	0.713675
0.775194	1.61423
1.16279	1.57224
1.55039	1.41702
1.93798	0.269411
2.32558	1.14476
2.71318	2.24816
3.10078	1.94759
3.48837	1.37047
3.87597	1.97633
4.26357	1.51728
4.65116	1.54191
5.03876	1.89367
5.42636	1.40733
5.81395	1.7209
6.20155	3.64952
6.58915	1.88525
6.97674	2.92283
7.36434	3.07538
7.75194	4.24884
8.13953	4.82663
8.52713	4.52458
8.91473	3.55569
9.30233	3.59311
9.68992	3.35404
10.0775	3.39937
10.4651	3.52453
10.8527	3.64807
11.2403	3.95573
11.6279	3.10539
12.0155	3.41913
12.4031	4.30768
12.7907	3.08491
13.1783	3.4818
13.5659	2.61416
13.9535	4.20733
14.3411	4.36933
14.7287	3.87457
15.1163	2.91898
15.5039	4.22282
15.8915	4.25022
16.2791	4.1449
16.6667	4.32792
17.0543	4.23629
17.4419	3.83103
17.8295	4.61492
18.2171	4.75274
18.6047	6.10673
18.9922	7.17041
19.3798	8.29062
19.7674	9.90421
20.155	10.7679
20.5426	11.7355
20.9302	12.0415
21.3178	11.4631
21.7054	11.2627
22.093	9.85612
22.4806	9.26644
22.8682	9.13999
23.2558	8.98264
23.6434	6.4879
24.031	7.29883
24.4186	7.92654
24.8062	8.22587
25.1938	9.10864
25.5814	7.86515
25.969	6.24812
26.3566	6.44405
26.7442	7.31471
27.1318	6.94543
27.5194	5.90081
27.907	6.43989
28.2946	7.26549
28.6822	8.62904
29.0698	10.1711
29.4574	10.5043
29.845	11.3755
30.2326	12.6596
30.6202	11.4849
31.0078	13.232
31.3953	11.4077
31.7829	11.4271
32.1705	12.7443
32.5581	13.472
32.9457	10.3411
33.3333	10.4235
33.7209	11.2975
34.1085	10.9996
34.4961	8.37942
34.8837	10.3743
35.2713	12.0347
35.6589	10.3603
36.0465	10.8098
36.4341	10.4513
36.8217	11.1775
37.2093	11.5715
37.5969	10.4838
37.9845	10.1699
38.3721	9.10484
38.7597	8.8919
39.1473	8.37217
39.5349	11.7633
39.9225	11.5819
40.3101	10.6861
40.6977	10.9654
41.0853	9.87239
41.4729	9.68998
41.8605	10.7117
42.2481	9.88716
42.6357	9.45232
43.0233	9.78246
43.4109	8.01589
43.7984	8.83118
44.186	8.99292
44.5736	10.0616
44.9612	11.7632
45.3488	12.7597
45.7364	13.0714
46.124	10.0786
46.5116	9.68502
46.8992	9.43267
47.2868	9.23123
47.6744	8.52563
48.062	9.36164
48.4496	9.84132
48.8372	9.66712
49.2248	8.7664
49.6124	8.88396
50	7.8179
50.3876	7.39106
50.7752	7.54489
51.1628	8.12682
51.5504	7.80494
51.938	7.8456
52.3256	7.34727
52.7132	6.56955
53.1008	6.52922
53.4884	7.15723
53.876	6.78662
54.2636	7.77473
54.6512	6.95122
55.0388	5.89996
55.4264	6.02712
55.814	5.9384
56.2016	6.08711
56.5891	6.02304
56.9767	5.95608
57.3643	6.06524
57.7519	5.28575
58.1395	6.25658
58.5271	5.82195
58.9147	5.14172
59.3023	4.94513
59.6899	3.83462
60.0775	4.78217
60.4651	6.0499
60.8527	7.13289
61.2403	7.1002
61.6279	7.71114
62.0155	8.25546
62.4031	8.03678
62.7907	9.84087
63.1783	9.81032
63.5659	10.5884
63.9535	9.34456
64.3411	10.0976
64.7287	9.96416
65.1163	10.9185
65.5039	9.77996
65.8915	9.33523
66.2791	8.79572
66.6667	9.77672
67.0543	10.2372
67.4419	10.1105
67.8295	10.1743
68.2171	9.23682
68.6047	9.85294
68.9922	8.55958
69.3798	8.99711
69.7674	7.67853
70.155	7.57142
70.5426	7.73061
70.9302	7.86944
71.3178	8.17075
71.7054	9.83763
72.093	11.1246
72.4806	11.7094
72.8682	11.2241
73.2558	12.0925
73.6434	9.99765
74.031	10.6
74.4186	12.1141
74.8062	11.0876
75.1938	12.9059
75.5814	10.931
75.969	12.0925
76.3566	12.8622
76.7442	14.3427
77.1318	12.1688
77.5194	12.2761
77.907	12.8838
78.2946	13.2177
78.6822	12.5828
79.0698	13.2846
79.4574	10.6252
79.845	10.9309
80.2326	11.2205
80.6202	14.0208
81.0078	11.804
81.3953	11.2346
81.7829	12.3252
82.1705	13.1582
82.5581	12.9296
82.9457	11.9334
83.3333	12.9341
83.7209	13.5328
84.1085	16.2924
84.4961	16.8199
84.8837	16.9051
85.2713	13.0055
85.6589	15.916
86.0465	13.1042
86.4341	10.4239
86.8217	9.77861
87.2093	8.80333
87.5969	7.78796
87.9845	8.11482
88.3721	2.93652
88.7597	2.08576
89.1473	3.01613
89.5349	3.0489
89.9225	2.43186
90.3101	2.58286
90.6977	3.23695
91.0853	1.18961
91.4729	1.18328
91.8605	1.76796
92.2481	1.85815
92.6357	1.76556
93.0233	0.80191
93.4109	1.44107
93.7984	1.31253
94.186	1.67647
94.5736	1.32056
94.9612	0.92244
95.3488	0.980416
95.7364	1.75852
96.124	1.24555
96.5116	1.35475
96.8992	1.27833
97.2868	1.14486
97.6744	1.41026
98.062	1.04455
98.4496	0.392516
98.8372	0
99.2248	0.0177653
99.6124	0.403488
100	0.339782
0	1.18989
0.367647	1.53493
0.735294	2.55295
1.10294	2.58624
1.47059	2.53135
1.83824	2.68841
2.20588	2.33007
2.57353	3.3434
2.94118	3.64994
3.30882	5.50796
3.67647	6.0199
4.04412	6.53609
4.41176	6.43225
4.77941	7.32577
5.14706	9.56086
5.51471	10.9492
5.88235	13.5592
6.25	14.9852
6.61765	15.5835
6.98529	16.5766
7.35294	17.3984
7.72059	17.14
8.08824	20.2695
8.45588	24.4936
8.82353	24.6962
9.19118	21.4809
9.55882	21.57
9.92647	22.813
10.2941	23.8846
10.6618	25.6704
11.0294	25.4229
11.3971	28.3044
11.7647	24.2642
12.1324	26.8964
12.5	21.1027
12.8676	19.9593
13.2353	23.8756
13.6029	24.0371
13.9706	22.2037
14.3382	23.1273
14.7059	22.2932
15.0735	22.8354
15.4412	22.0462
15.8088	23.2325
16.1765	26.0639
16.5441	22.3623
16.9118	22.8818
17.2794	20.2145
17.6471	21.9009
18.0147	19.5618
18.3824	18.5245
18.75	21.4776
19.1176	20.7068
19.4853	19.4897
19.8529	19.8955
20.2206	18.1255
20.5882	16.817
20.9559	17.238
21.3235	15.5899
21.6912	16.2838
22.0588	20.5166
22.4265	16.552
22.7941	17.8649
23.1618	17.2293
23.5294	16.8648
23.8971	17.4977
24.2647	18.2588
24.6324	20.8427
25	20.9309
25.3676	16.9624
25.7353	17.8145
26.1029	15.4496
26.4706	18.8025
26.8382	19.3602
27.2059	12.7059
27.5735	13.6336
27.9412	11.9663
28.3088	14.3467
28.6765	14.7856
29.0441	17.1482
29.4118	17.442
29.7794	16.2852
30.1471	16.0807
30.5147	17.6077
30.8824	14.858
31.25	15.8013
31.6176	18.5799
31.9853	20.4039
32.3529	21.7502
32.7206	21.8084
33.0882	22.0413
33.4559	25.5098
33.8235	25.3011
34.1912	22.4416
34.5588	21.4665
34.9265	20.3856
35.2941	21.9969
35.6618	22.7598
36.0294	21.1651
36.3971	24.554
36.7647	26.1842
37.1324	26.7194
37.5	25.6258
37.8676	22.7792
38.2353	21.0341
38.6029	24.6295
38.9706	22.2378
39.3382	24.7957
39.7059	26.739
40.0735	25.4967
40.4412	28.8569
40.8088	30.1965
41.1765	32.5312
41.5441	24.8935
41.9118	26.3748
42.2794	24.4844
42.6471	24.788
43.0147	21.9127
43.3824	20.098
43.75	22.5476
44.1176	21.645
44.4853	22.7787
44.8529	22.75
45.2206	17.3965
45.5882	15.7188
45.9559	16.6874
46.3235	16.4307
46.6912	17.1097
47.0588	18.1326
47.4265	15.5697
47.7941	14.7331
48.1618	15.2022
48.5294	15.7802
48.8971	16.6886
49.2647	17.4656
49.6324	16.4156
50	16.1323
50.3676	13.9283
50.7353	13.3054
51.1029	14.2992
51.4706	14.9426
51.8382	14.7962
52.2059	14.9741
52.5735	16.5749
52.9412	16.9394
53.3088	20.9832
53.6765	17.9977
54.0441	23.4155
54.4118	20.2291
54.7794	21.3009
55.1471	20.8286
55.5147	21.8446
55.8824	18.2435
56.25	21.8993
56.6176	18.9039
56.9853	21.5652
57.3529	20.2382
57.7206	20.058
58.0882	21.5432
58.4559	21.169
58.8235	24.2848
59.1912	21.4048
59.5588	22.1783
59.9265	19.0083
60.2941	18.6402
60.6618	20.8415
61.0294	19.0899
61.3971	21.1718
61.7647	15.965
62.1324	15.5984
62.5	16.9992
62.8676	17.3123
63.2353	14.5762
63.6029	13.7408
63.9706	13.7205
64.3382	13.7107
64.7059	12.1638
65.0735	11.6653
65.4412	11.1295
65.8088	10.8297
66.1765	9.18497
66.5441	9.88028
66.9118	11.6742
67.2794	10.4107
67.6471	14.2276
68.0147	10.3909
68.3824	11.3363
68.75	12.0771
69.1176	12.5303
69.4853	12.3644
69.8529	13.8025
70.2206	11.9227
70.5882	12.3946
70.9559	14.989
71.3235	12.0449
71.6912	13.1173
72.0588	14.7826
72.4265	14.0988
72.7941	15.4823
73.1618	16.0588
73.5294	19.0218
73.8971	21.1755
74.2647	21.4698
74.6324	21.9809
75	23.789
75.3676	22.7999
75.7353	20.4452
76.1029	20.1593
76.4706	19.5684
76.8382	18.6402
77.2059	18.9036
77.5735	19.4119
77.9412	19.7429
78.3088	22.1747
78.6765	16.6641
79.0441	15.6839
79.4118	12.9659
79.7794	11.0507
80.1471	11.8339
80.5147	11.3728
80.8824	12.2579
81.25	12.591
81.6176	13.8274
81.9853	15.3354
82.3529	15.9308
82.7206	15.9033
83.0882	14.2795
83.4559	14.7688
83.8235	11.8127
84.1912	11.9543
84.5588	12.9416
84.9265	13.0391
85.2941	14.2205
85.6618	13.1574
86.0294	11.6475
86.3971	11.4167
86.7647	12.9073
87.1324	12.9289
87.5	9.42832
87.8676	12.5306
88.2353	12.335
88.6029	11.2531
88.9706	11.65
89.3382	10.7728
89.7059	10.4351
90.0735	11.3434
90.4412	11.4807
90.8088	10.3571
91.1765	11.9345
91.5441	11.9678
91.9118	11.9281
92.2794	12.9678
92.6471	11.6046
93.0147	11.1129
93.3824	7.00102
93.75	6.94426
94.1176	6.95377
94.4853	7.05313
94.8529	7.87002
95.2206	8.21505
95.5882	7.00419
95.9559	8.43293
96.3235	8.47656
96.6912	8.58006
97.0588	7.94969
97.4265	6.95264
97.7941	6.6211
98.1618	5.58802
98.5294	4.27507
98.8971	4.33048
99.2647	3.00166
99.6324	4.17762
100	4.51752
0	5.13877
0.558659	6.52033
1.11732	6.35787
1.67598	7.58147
2.23464	9.82706
2.7933	9.43784
3.35196	7.30287
3.91061	7.81083
4.46927	8.16218
5.02793	8.64221
5.58659	7.18111
6.14525	7.91107
6.70391	7.62411
7.26257	8.3911
7.82123	8.64217
8.37989	9.39908
8.93855	9.4652
9.49721	10.799
10.0559	8.54282
10.6145	8.30223
11.1732	9.31078
11.7318	8.37131
12.2905	10.5482
12.8492	9.72542
13.4078	10.0838
13.9665	9.50336
14.5251	10.9602
15.0838	10.2973
15.6425	9.08086
16.2011	10.8297
16.7598	11.553
17.3184	11.7619
17.8771	12.2122
18.4358	12.2836
18.9944	12.0335
19.5531	12.8623
20.1117	12.3692
20.6704	14.7257
21.2291	15.8093
21.7877	20.6365
22.3464	17.0292
22.905	20.4227
23.4637	22.1668
24.0223	23.2914
24.581	26.941
25.1397	23.806
25.6983	21.088
26.257	22.3767
26.8156	21.0079
27.3743	22.3226
27.933	25.2948
28.4916	27.1862
29.0503	33.0496
29.6089	28.5063
30.1676	28.0603
30.7263	32.7773
31.2849	26.5771
31.8436	25.3013
32.4022	24.7775
32.9609	20.8475
33.5196	18.639
34.0782	15.845
34.6369	13.7177
35.1955	14.3225
35.7542	12.9996
36.3128	9.90276
36.8715	9.44832
37.4302	7.08787
37.9888	5.29021
38.5475	6.59293
39.1061	5.99357
39.6648	6.75406
40.2235	5.39793
40.7821	6.08906
41.3408	5.76215
41.8994	6.43981
42.4581	8.41445
43.0168	9.06901
43.5754	10.3069
44.1341	10.3626
44.6927	8.47685
45.2514	10.1891
45.8101	9.81433
46.3687	11.648
46.9274	12.3721
47.486	13.4057
48.0447	13.4076
48.6034	15.9368
49.162	13.5952
49.7207	14.4207
50.2793	16.7506
50.838	21.6226
51.3966	18.9437
51.9553	16.7016
52.514	13.5027
53.0726	14.0567
53.6313	16.3231
54.1899	16.1428
54.7486	12.0742
55.3073	9.78182
55.8659	11.6317
56.4246	14.5276
56.9832	13.8202
57.5419	9.07364
58.1006	8.52114
58.6592	10.8342
59.2179	12.0703
59.7765	12.7474
60.3352	15.9932
60.8939	24.0456
61.4525	29.7777
62.0112	31.4639
62.5698	24.3811
63.1285	18.9951
63.6872	16.1999
64.2458	17.3708
64.8045	21.5639
65.3631	27.0061
65.9218	27.8251
66.4804	29.5257
67.0391	25.857
67.5978	23.5896
68.1564	29.4369
68.7151	29.8776
69.2737	32.5154
69.8324	26.4963
70.3911	35.3744
70.9497	27.54
71.5084	29.3601
72.067	25.9612
72.6257	27.783
73.1844	28.8909
73.743	25.1951
74.3017	24.6191
74.8603	21.4724
75.419	22.1623
75.9777	20.1006
76.5363	18.6007
77.095	14.0798
77.6536	17.2902
78.2123	15.8678
78.7709	17.4673
79.3296	14.5083
79.8883	17.0224
80.4469	18.6968
81.0056	19.8762
81.5642	24.1739
82.1229	29.0835
82.6816	32.4886
83.2402	41.0751
83.7989	43.0441
84.3575	31.4711
84.9162	45.7352
85.4749	39.667
86.0335	29.8434
86.5922	27.8094
87.1508	21.3888
87.7095	20.4533
88.2682	19.7845
88.8268	19.7867
89.3855	21.3668
89.9441	20.0956
90.5028	24.1598
91.0615	17.4449
91.6201	20.4248
92.1788	19.2698
92.7374	17.6279
93.2961	17.3619
93.8547	18.666
94.4134	18.2272
94.9721	18.7799
95.5307	13.8119
96.0894	13.687
96.648	13.4955
97.2067	16.5831
97.7654	12.5629
98.324	12.6452
98.8827	8.60576
99.4413	6.88955
100	5.38911
0	4.47017
0.540541	8.7648
1.08108	11.52
1.62162	11.4914
2.16216	13.0802
2.7027	15.5288
3.24324	13.9475
3.78378	15.2383
4.32432	14.7074
4.86486	13.9242
5.40541	12.96
5.94595	13.7387
6.48649	13.6291
7.02703	13.5463
7.56757	13.4406
8.10811	14.1125
8.64865	16.0805
9.18919	16.8
9.72973	17.3347
10.2703	18.8885
10.8108	23.2127
11.3514	27.1487
11.8919	30.4329
12.4324	31.1704
12.973	33.4988
13.5135	37.2864
14.0541	41.7306
14.5946	45.2774
15.1351	50.9526
15.6757	60.1239
16.2162	62.6036
16.7568	46.4405
17.2973	38.9532
17.8378	40.2988
18.3784	38.9354
18.9189	36.8475
19.4595	32.8305
20	31.9784
20.5405	30.4524
21.0811	25.6255
21.6216	27.0463
22.1622	26.5985
22.7027	19.1447
23.2432	18.9065
23.7838	17.5239
24.3243	17.5604
24.8649	16.0364
25.4054	15.449
25.9459	13.8804
26.4865	17.158
27.027	19.5036
27.5676	19.1729
28.1081	22.707
28.6486	21.1892
29.1892	22.2517
29.7297	22.1129
30.2703	20.8304
30.8108	27.4226
31.3514	20.0802
31.8919	25.472
32.4324	22.4111
32.973	20.6373
33.5135	22.2911
34.0541	22.8423
34.5946	23.1566
35.1351	25.0719
35.6757	27.2435
36.2162	25.6804
36.7568	35.1809
37.2973	26.8813
37.8378	22.014
38.3784	23.0521
38.9189	20.7593
39.4595	19.6527
40	22.2458
40.5405	27.1626
41.0811	22.54
41.6216	23.9719
42.1622	25.5489
42.7027	27.4052
43.2432	25.4368
43.7838	26.2477
44.3243	24.4471
44.8649	24.8263
45.4054	25.9466
45.9459	26.1497
46.4865	25.3427
47.027	26.5733
47.5676	26.2937
48.1081	25.1137
48.6486	23.9429
49.1892	25.0053
49.7297	26.6014
50.2703	27.0434
50.8108	28.2458
51.3514	28.0094
51.8919	25.9957
52.4324	24.9426
52.973	24.0356
53.5135	24.6985
54.0541	26.1149
54.5946	22.9755
55.1351	21.4615
55.6757	20.5486
56.2162	21.0821
56.7568	20.9701
57.2973	21.0071
57.8378	21.3071
58.3784	18.8286
58.9189	19.3139
59.4595	19.3579
60	18.4661
60.5405	16.4387
61.0811	15.5198
61.6216	15.4703
62.1622	13.5181
62.7027	11.841
63.2432	10.2565
63.7838	12.9621
64.3243	9.62612
64.8649	12.452
65.4054	9.92191
65.9459	12.391
66.4865	12.0906
67.027	11.5231
67.5676	10.8892
68.1081	14.4999
68.6486	11.6181
69.1892	13.1315
69.7297	15.4597
70.2703	13.4915
70.8108	12.4382
71.3514	13.5276
71.8919	14.8981
72.4324	15.081
72.973	13.9521
73.5135	15.793
74.0541	13.4018
74.5946	17.2325
75.1351	15.114
75.6757	15.9275
76.2162	17.8735
76.7568	21.3713
77.2973	12.3143
77.8378	14.1854
78.3784	11.5571
78.9189	12.1221
79.4595	6.31105
80	7.465
80.5405	9.80521
81.0811	9.03309
81.6216	6.71198
82.1622	6.97048
82.7027	6.84479
83.2432	6.67891
83.7838	4.94993
84.3243	4.53391
84.8649	4.43513
85.4054	7.85741
85.9459	13.936
86.4865	16.3717
87.027	13.2034
87.5676	13.411
88.1081	11.76
88.6486	19.7236
89.1892	15.3611
89.7297	18.9729
90.2703	15.3367
90.8108	16.4119
91.3514	19.0302
91.8919	14.9426
92.4324	14.6013
92.973	12.1979
93.5135	14.5968
94.0541	11.1735
94.5946	11.925
95.1351	8.40987
95.6757	7.0284
96.2162	8.47328
96.7568	7.16303
97.2973	7.45108
97.8378	7.5394
98.3784	4.45531
98.9189	4.96141
99.4595	2.74383
100	3.71359
0	49.4386
0.194175	49.453
0.38835	50.8063
0.582524	68.0428
0.776699	52.8664
0.970874	58.5229
1.16505	72.983
1.35922	70.0563
1.5534	59.6966
1.74757	55.4451
1.94175	53.8033
2.13592	47.9749
2.3301	54.5658
2.52427	54.8729
2.71845	61.7081
2.91262	47.1779
3.1068	62.4214
3.30097	53.0376
3.49515	64.4171
3.68932	62.6103
3.8835	58.8627
4.07767	59.6117
4.27184	60.7862
4.46602	59.0157
4.66019	77.0864
4.85437	82.5343
5.04854	68.6314
5.24272	84.2311
5.43689	61.8775
5.63107	71.6197
5.82524	76.7829
6.01942	47.3749
6.21359	65.7825
6.40777	46.2965
6.60194	45.2676
6.79612	46.2942
6.99029	44.8432
7.18447	46.6025
7.37864	46.6124
7.57282	47.0142
7.76699	39.1518
7.96117	39.4461
8.15534	42.2469
8.34951	45.1987
8.54369	50.2753
8.73786	38.9436
8.93204	41.0108
9.12621	39.2547
9.32039	36.631
9.51456	30.8408
9.70874	29.9382
9.90291	30.5361
10.0971	36.2103
10.2913	29.3501
10.4854	30.5401
10.6796	42.7635
10.8738	38.0762
11.068	38.8159
11.2621	55.4901
11.4563	35.2335
11.6505	32.8109
11.8447	42.4905
12.0388	50.8114
12.233	41.9487
12.4272	33.6863
12.6214	26.5621
12.8155	31.071
13.0097	37.2293
13.2039	40.1583
13.3981	52.534
13.5922	49.3368
13.7864	47.048
13.9806	22.4331
14.1748	28.1786
14.3689	34.0684
14.5631	31.9236
14.7573	32.7816
14.9515	42.6701
15.1456	52.5829
15.3398	57.2664
15.534	27.0366
15.7282	32.5052
15.9223	31.1499
16.1165	29.3233
16.3107	27.0072
16.5049	20.6861
16.699	18.1833
16.8932	21.5336
17.0874	21.9887
17.2816	30.09
17.4757	33.7724
17.6699	30.0837
17.8641	31.7914
18.0583	26.72
18.2524	21.9507
18.4466	20.8102
18.6408	17.8356
18.835	14.2951
19.0291	18.1909
19.2233	18.8271
19.4175	22.7781
19.6117	20.033
19.8058	18.2359
20	17.4698
20.1942	20.1125
20.3883	20.7408
20.5825	25.2926
20.7767	25.8075
20.9709	26.2057
21.165	36.0289
21.3592	56.0662
21.5534	53.6509
21.7476	43.1374
21.9417	56.7304
22.1359	41.8543
22.3301	21.1597
22.5243	20.2273
22.7184	26.5336
22.9126	29.9164
23.1068	24.8613
23.301	24.4807
23.4951	25.2222
23.6893	28.6418
23.8835	36.113
24.0777	30.3878
24.2718	36.966
24.466	44.0512
24.6602	43.4271
24.8544	49.414
25.0485	43.478
25.2427	50.0579
25.4369	50.9258
25.6311	53.7116
25.8252	50.8011
26.0194	65.4834
26.2136	44.16
26.4078	60.5799
26.6019	38.7194
26.7961	39.982
26.9903	34.5525
27.1845	40.6206
27.3786	49.0604
27.5728	43.7622
27.767	40.4387
27.9612	37.0572
28.1553	38.4736
28.3495	42.3206
28.5437	38.244
28.7379	36.0582
28.932	42.0504
29.1262	60.4865
29.3204	77.4848
29.5146	67.689
29.7087	58.0324
29.9029	52.8413
30.0971	45.5659
30.2913	37.242
30.4854	32.4982
30.6796	28.5633
30.8738	31.8389
31.068	31.6278
31.2621	32.8764
31.4563	41.9113
31.6505	41.058
31.8447	33.0522
32.0388	31.5457
32.233	31.9936
32.4272	45.9393
32.6214	43.2489
32.8155	44.5613
33.0097	40.5841
33.2039	44.3216
33.3981	41.5942
33.5922	44.4087
33.7864	36.256
33.9806	42.1147
34.1748	40.3402
34.3689	38.6449
34.5631	37.1591
34.7573	43.5996
34.9515	36.5379
35.1456	20.5523
35.3398	21.4566
35.534	17.9695
35.7282	23.5739
35.9223	21.0119
36.1165	28.7541
36.3107	27.3853
36.5049	29.0396
36.699	29.1554
36.8932	52.0737
37.0874	57.9675
37.2816	56.6213
37.4757	51.6082
37.6699	42.8809
37.8641	37.0612
38.0583	18.7175
38.2524	17.0188
38.4466	15.7421
38.6408	15.4151
38.835	16.1957
39.0291	15.5454
39.2233	14.9102
39.4175	17.7121
39.6117	14.4253
39.8058	17.7959
40	22.897
40.1942	23.752
40.3883	24.665
40.5825	27.8899
40.7767	24.3139
40.9709	31.909
41.165	32.77
41.3592	27.6193
41.5534	27.0411
41.7476	30.9512
41.9417	23.51
42.1359	23.0374
42.3301	22.6947
42.5243	18.4479
42.7184	21.9754
42.9126	18.7888
43.1068	14.6269
43.301	16.4451
43.4951	12.9328
43.6893	19.1481
43.8835	21.0616
44.0777	16.3284
44.2718	17.106
44.466	15.575
44.6602	12.9015
44.8544	13.4569
45.0485	19.2797
45.2427	21.3079
45.4369	14.8825
45.6311	16.8639
45.8252	15.7777
46.0194	20.1477
46.2136	11.2308
46.4078	11.7489
46.6019	15.7335
46.7961	12.771
46.9903	13.181
47.1845	14.6177
47.3786	16.4377
47.5728	14.5195
47.767	13.4335
47.9612	15.1622
48.1553	15.1616
48.3495	16.9419
48.5437	18.5328
48.7379	21.6287
48.932	19.9024
49.1262	16.7074
49.3204	17.6844
49.5146	21.9771
49.7087	22.0978
49.9029	23.887
50.0971	21.9911
50.2913	15.5925
50.4854	11.9806
50.6796	18.1873
50.8738	7.7523
51.068	13.6796
51.2621	10.8761
51.4563	17.2494
51.6505	13.6458
51.8447	16.2271
52.0388	15.2814
52.233	14.4066
52.4272	13.5779
52.6214	19.1838
52.8155	15.8214
53.0097	14.2236
53.2039	14.0761
53.3981	14.9371
53.5922	13.6784
53.7864	15.5206
53.9806	12.0211
54.1748	11.395
54.3689	13.0604
54.5631	11.4872
54.7573	10.4735
54.9515	15.4437
55.1456	16.0862
55.3398	12.3646
55.534	9.00628
55.7282	12.4233
55.9223	10.4536
56.1165	9.99252
56.3107	12.233
56.5049	12.5607
56.699	14.3439
56.8932	15.2572
57.0874	13.8718
57.2816	9.90006
57.4757	8.24282
57.6699	13.2851
57.8641	13.606
58.0583	6.75888
58.2524	10.6221
58.4466	12.4974
58.6408	8.58169
58.835	9.40366
59.0291	16.5573
59.2233	14.2647
59.4175	16.37
59.6117	10.717
59.8058	10.5597
60	12.9079
60.1942	13.7562
60.3883	15.0483
60.5825	13.7645
60.7767	11.0087
60.9709	13.0802
61.165	12.4741
61.3592	15.0776
61.5534	19.8751
61.7476	11.8674
61.9417	22.4749
62.1359	25.3463
62.3301	20.0412
62.5243	18.1834
62.7184	18.7956
62.9126	20.6497
63.1068	18.079
63.301	23.3658
63.4951	21.581
63.6893	26.4173
63.8835	28.0891
64.0777	33.3815
64.2718	34.8275
64.466	29.9619
64.6602	38.0725
64.8544	31.3306
65.0485	22.553
65.2427	24.5107
65.4369	23.3789
65.6311	22.2136
65.8252	21.7061
66.0194	13.9457
66.2136	13.861
66.4078	15.8395
66.6019	18.44
66.7961	21.7548
66.9903	22.5859
67.1845	23.5558
67.3786	18.0705
67.5728	16.9061
67.767	19.5021
67.9612	18.7354
68.1553	20.832
68.3495	19.5829
68.5437	16.2498
68.7379	18.8268
68.932	21.4684
69.1262	21.8105
69.3204	26.0517
69.5146	28.8422
69.7087	31.5955
69.9029	32.2078
70.0971	37.0982
70.2913	40.8461
70.4854	38.9793
70.6796	35.9969
70.8738	36.0397
71.068	34.0634
71.2621	38.882
71.4563	40.8341
71.6505	38.1979
71.8447	41.5346
72.0388	43.0962
72.233	48.0439
72.4272	47.2336
72.6214	41.8258
72.8155	42.039
73.0097	41.191
73.2039	36.928
73.3981	36.0239
73.5922	35.8045
73.7864	44.3983
73.9806	47.6049
74.1748	43.2109
74.3689	48.4418
74.5631	63.0778
74.7573	62.6903
74.9515	63.8016
75.1456	54.619
75.3398	55.6601
75.534	69.6822
75.7282	73.3168
75.9223	71.9475
76.1165	63.9127
76.3107	61.0882
76.5049	66.4753
76.699	63.5716
76.8932	54.8438
77.0874	49.6631
77.2816	49.9346
77.4757	53.999
77.6699	54.9242
77.8641	56.4833
78.0583	53.281
78.2524	46.9136
78.4466	33.8302
78.6408	34.0639
78.835	30.5217
79.0291	39.3152
79.2233	32.0356
79.4175	26.7808
79.6117	32.3881
79.8058	31.219
80	32.7159
80.1942	30.2727
80.3883	28.9281
80.5825	29.9997
80.7767	32.7457
80.9709	34.929
81.165	28.6287
81.3592	30.5204
81.5534	30.7453
81.7476	37.5049
81.9417	47.0703
82.1359	54.3851
82.3301	57.1938
82.5243	59.8478
82.7184	49.7972
82.9126	50.2409
83.1068	49.9341
83.301	54.6151
83.4951	54.8376
83.6893	57.5621
83.8835	59.2874
84.0777	62.1551
84.2718	67.3807
84.466	84.4083
84.6602	86.5218
84.8544	73.2155
85.0485	68.639
85.2427	57.6289
85.4369	63.126
85.6311	69.8318
85.8252	61.723
86.0194	57.5785
86.2136	60.4366
86.4078	55.599
86.6019	56.6285
86.7961	50.8068
86.9903	61.0713
87.1845	67.7302
87.3786	83.8464
87.5728	100
87.767	94.3186
87.9612	85.8232
88.1553	72.2143
88.3495	65.467
88.5437	61.1353
88.7379	63.1359
88.932	64.8757
89.1262	69.8869
89.3204	75.2451
89.5146	66.712
89.7087	76.7866
89.9029	84.5251
90.0971	75.6543
90.2913	63.8522
90.4854	64.3422
90.6796	64.8699
90.8738	77.3334
91.068	85.0193
91.2621	77.9752
91.4563	70.4463
91.6505	88.4259
91.8447	87.8401
92.0388	81.8044
92.233	74.9728
92.4272	85.4947
92.6214	90.1945
92.8155	92.8536
93.0097	75.3088
93.2039	69.9024
93.3981	67.7145
93.5922	55.9015
93.7864	58.164
93.9806	54.4888
94.1748	50.1425
94.3689	55.7386
94.5631	55.0402
94.7573	40.8342
94.9515	43.9211
95.1456	49.8976
95.3398	45.8121
95.534	56.2551
95.7282	65.49
95.9223	58.2534
96.1165	58.6807
96.3107	62.7544
96.5049	51.0874
96.699	64.8866
96.8932	61.5086
97.0874	36.2665
97.2816	42.4446
97.4757	44.4079
97.6699	48.2588
97.8641	45.4843
98.0583	48.0272
98.2524	47.6811
98.4466	45.0698
98.6408	53.9615
98.835	46.7237
99.0291	43.8108
99.2233	49.0518
99.4175	48.8314
99.6117	46.0257
99.8058	42.1511
100	42.0961
0	28.9038
0.17762	32.8228
0.35524	29.2182
0.53286	44.5791
0.71048	60.5868
0.888099	56.1806
1.06572	37.9702
1.24334	34.9691
1.42096	41.8814
1.59858	40.4552
1.7762	41.0703
1.95382	33.6647
2.13144	37.7405
2.30906	44.8782
2.48668	52.8489
2.6643	50.6225
2.84192	41.3043
3.01954	46.3684
3.19716	47.6739
3.37478	27.8908
3.5524	23.2919
3.73002	27.1126
3.90764	27.4085
4.08526	32.1403
4.26288	39.7112
4.4405	33.1522
4.61812	32.6049
4.79574	16.7877
4.97336	19.6493
5.15098	29.4837
5.3286	23.1491
5.50622	26.9401
5.68384	30.3179
5.86146	40.92
6.03908	43.0263
6.2167	33.6659
6.39432	35.5989
6.57194	37.3669
6.74956	37.3056
6.92718	33.2686
7.1048	43.3837
7.28242	28.0101
7.46004	26.7364
7.63766	37.3168
7.81528	40.3528
7.9929	44.8775
8.17052	40.0106
8.34813	52.0185
8.52575	43.9284
8.70337	47.4716
8.88099	41.3811
9.05861	51.0459
9.23623	57.705
9.41385	42.223
9.59147	47.0961
9.76909	42.7382
9.94671	37.3454
10.1243	47.1992
10.302	54.85
10.4796	55.5381
10.6572	47.2203
10.8348	66.8195
11.0124	55.2225
11.1901	58.8847
11.3677	53.8825
11.5453	61.2891
11.7229	44.1471
11.9005	42.6347
12.0782	37.6809
12.2558	32.0026
12.4334	30.2326
12.611	32.849
12.7886	31.0626
12.9663	29.0807
13.1439	24.6325
13.3215	29.2846
13.4991	39.1732
13.6767	40.7388
13.8544	43.684
14.032	40.4946
14.2096	60.1482
14.3872	38.2694
14.5648	100
14.7425	74.9498
14.9201	88.9858
15.0977	97.6269
15.2753	68.0309
15.4529	23.4687
15.6306	22.6734
15.8082	18.85
15.9858	21.0953
16.1634	25.6672
16.341	26.5269
16.5187	29.2835
16.6963	34.3533
16.8739	29.2376
17.0515	31.6461
17.2291	27.5095
17.4067	26.8799
17.5844	18.1725
17.762	26.4426
17.9396	24.971
18.1172	19.9292
18.2948	23.4161
18.4725	31.1327
18.6501	31.5509
18.8277	26.6451
19.0053	19.8073
19.1829	22.7658
19.3606	20.8261
19.5382	17.0324
19.7158	26.7424
19.8934	26.6959
20.071	29.6203
20.2487	26.695
20.4263	16.4221
20.6039	22.0023
20.7815	28.4005
20.9591	16.156
21.1368	20.5946
21.3144	17.2362
21.492	15.7429
21.6696	22.9588
21.8472	35.3475
22.0249	44.9147
22.2025	33.7624
22.3801	31.7171
22.5577	30.9288
22.7353	31.1135
22.913	22.5831
23.0906	23.3982
23.2682	25.3131
23.4458	28.2514
23.6234	29.836
23.8011	33.9955
23.9787	36.1487
24.1563	34.8158
24.3339	41.6331
24.5115	33.3759
24.6892	28.3116
24.8668	23.3926
25.0444	21.4308
25.222	27.0198
25.3996	40.8358
25.5773	54.8702
25.7549	46.1268
25.9325	41.8266
26.1101	45.4246
26.2877	47.7586
26.4654	27.955
26.643	33.9397
26.8206	44.2162
26.9982	42.2668
27.1758	51.7284
27.3535	60.8929
27.5311	51.7979
27.7087	60.4922
27.8863	53.3098
[truncated: 3,232 more rows]
