# Supplementary material for: De novo apical domain formation inside the Drosophila adult midgut epithelium
Source: eLife. 2022 Sep 28;11:e76366. doi: 10.7554/eLife.76366 (PMC9545526; doi:10.7554/eLife.76366)
Supplement: Figure 8—source data 1. [file elife-76366-fig8-data1.xlsx]

## Sheet: mutant
	with internal PAC	polarised	unpolarised
1841mesh	21	6	20
	8	7	44
	27	10	26
1782	13	3	50
	0	3	37
	6	8	78
	12	8	158
	4	2	71
	6	5	49
	1	2	33
	7	0	54
	3	5	56
	2	0	29
	1	0	32
	22	4	94
	3	7	47
sum	136	70	878	1084
	12.5461	6.45756	80.9963
1010TSP2A	0	1	73
	0	19	90
	0	3	27
	0	0	47
	0	20	86
	0	14	49
1866tsp2a	0	10	77
	0	0	20
	0	5	14
	0	1	16
	2	12	111
	0	1	26
	0	1	28
	2	6	47
	1	3	61
sum	5	96	772	873
	0.572738	10.9966	88.4307
	ssk			progenitor cells	apical domain	clones with PAC
2009 ssk[1]	0	2	19	4
	0	2	28	1
	1	5	77	13	16
	1	33	99	18	3	5
	0	40	80	26	8	6
	0	7	42	14	1	1
	1	54	106	16	0	2
	0	15	72	9	0	0
	2	21	155	15	1	0
	1	5	58	6	0	0
	6	184	736	122	29	14
				858
				1091
	0.549954	16.8653	67.461	11.1824	2.65811	1.28323
				78.6434

## Sheet: ctrl
	clones with fully formed apical actin domain	unpolarised
GAF82BX82B 1895 1-a2	71	13
	152	22
	86	8
	115	27
	43	3
	84	6
	10	2
	121	20
	92	7
	774	108	882
	87.7551	12.2449
